# Supplementary material for: An interrupted Heyns rearrangement approach for the regioselective synthesis of acylindoles
Source: Royal Society of Chemistry journal article supplement (doi:10.1039/d3cc04144a), 2023-01-01
Supplement: d3cc04144a1.pdf [file d3cc04144a1.pdf]

## Supporting information

### An interrupted Heyns rearrangement approach to regioselective synthesis of acylindoles

*Minakshi Altia and Pazhamalai Anbarasan\**

Department of Chemistry, Indian Institute of Technology Madras, Chennai-600036, India.

#### Contents

|                                                                                |    |
|--------------------------------------------------------------------------------|----|
| 1. General Comments:.....                                                      | 2  |
| 3. Synthesis of $\alpha$ -hydroxy dimethoxy acetal: .....                      | 3  |
| 3.1: Properties of synthesized compounds <b>1</b> : .....                      | 4  |
| 4: Properties of synthesized compounds <b>2</b> : .....                        | 6  |
| Optimization: Synthesis of <b>3a</b> from <b>1a</b> and <b>2a</b> .....        | 7  |
| 5. General procedure for synthesis of 2-acyl indole derivatives <b>3</b> ..... | 8  |
| 5.1. Synthesis of compound <b>3c</b> .....                                     | 8  |
| 5.2. Properties of synthesized 2-acyl indoles <b>3</b> : .....                 | 9  |
| 6. Optimization: Synthesis of 3-Acylindole <b>6a</b> .....                     | 17 |
| 6.1. Properties of synthesized 3-acyl indoles <b>6</b> : .....                 | 18 |
| 7. Synthetic application:.....                                                 | 22 |
| 8. References.....                                                             | 25 |
| 9. Spectral data: .....                                                        | 26 |
| 10. XRD data of <b>3g</b> , <b>6i</b> , and <b>6j</b> .....                    | 77 |

**1. General Comments:**

All reactions were carried out under atmospheric pressure using reaction tubes. Column chromatography was performed using Rankem Silica gel (100-200 mesh) and the solvent system used unless otherwise specified, was ethyl acetate-hexane with various percentage of polarity depending on the nature of the substrate. All chemicals and acids were purchased from either AVRA chemicals or Spectrochem and used as received.  $\alpha$ -Amino carbonyl derivatives **2** were synthesized employing the literature procedure.<sup>1</sup>

NMR data were recorded on a Bruker (400 MHz and 500 MHz) spectrometer. <sup>1</sup>H and <sup>13</sup>C NMR spectra were referenced to signals of deuterio solvents and residual protiated solvents, respectively. Infrared spectra were recorded on a Thermo Nicolet iS10 FT and Jasco ATR-IR spectrometer. HRMS were recorded by electrospray ionization (ESI) method on a Q-TOF Micro with lock spray source. The crystal data was collected and integrated using a Bruker Axs kappa apex2 CCD diffractometer, with graphite monochromated Mo-K $\alpha$  radiation.

### 3. Synthesis of $\alpha$ -hydroxy dimethoxy acetal:

#### Approach 1:

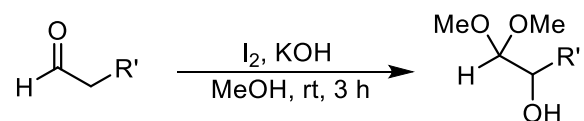

A solution of KOH (2.0 g, 35.82 mmol, 2.4 equiv) in 15 mL of MeOH was cooled to 0-5 °C. Then, the corresponding ketone (14.92 mmol, 1 equiv) was added dropwise. The reaction mixture was stirred for 10 minutes, then I<sub>2</sub> (4.1 g, 16.41 mmol, 1.1 equiv) in MeOH (10 mL) was slowly added to the reaction mixture and stirred for 3 h at the same temperature. After completion of the reaction, it was quenched with saturated solution of Na<sub>2</sub>S<sub>2</sub>O<sub>3</sub> and extracted with EtOAc. The combined organic layer was dried over anhydrous Na<sub>2</sub>SO<sub>4</sub> and the solvent was evaporated under reduced pressure. The crude product was suitable for further use or can be purified by column chromatography. Below derivatives were synthesized using this approach in one step from aliphatic aldehydes.  $\alpha$ -Hydroxy dimethoxy acetal derivatives **1** were also synthesized from the corresponding phenyl acetaldehydes in one step.<sup>3</sup>

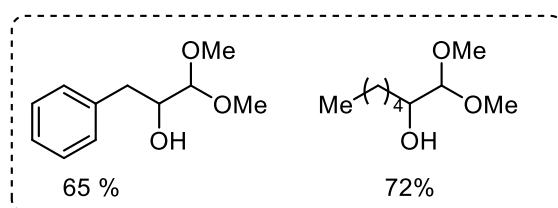

#### Approach 2:<sup>4-6</sup>

Few of the  $\alpha$ -hydroxy dimethoxy acetal derivatives were synthesized by following this alternative approach from acetophenone derivatives.

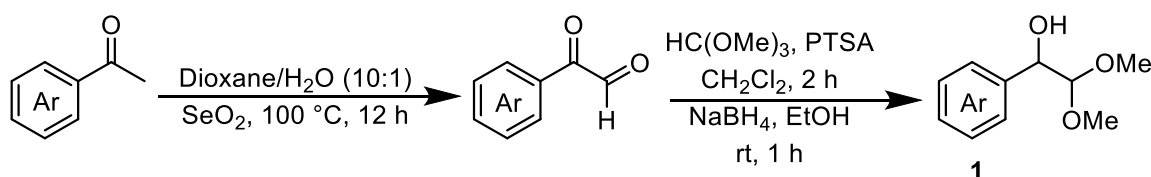

In an oven-dried 50 mL round bottom flask equipped with a reflux condenser, SeO<sub>2</sub> (2 g, 18.33 mmol, 1.1 equiv) was added followed by 10 mL of Dioxane/H<sub>2</sub>O (10:1) was introduced. After refluxing the reaction mixture for 15 min at 100 °C, the reaction mixture was cooled down to 50 °C then the corresponding acetophenone derivative (16.66 mmol, 1 equiv) was added dropwise. Subsequently, the temperature was increased to 100 °C and the stirring was continued at the same temperature for 12 h. Then the reaction mixture was cooled down to

room temperature and filtered through a silica-gel bed. The filtrate was dried over Na<sub>2</sub>SO<sub>4</sub> and concentrated under reduced pressure. The crude product was used for subsequent step without any further purification.

The resultant aryl glyoxal monohydrate (16.64 mmol, 1 equiv) was taken in a 100 mL round bottom flask and dissolved in 30 mL of DCM followed by PTSA (950 mg, 4.99 mmol, 0.3 equiv) and trimethylorthoformate (5.3 g, 49.92 mmol, 3 equiv) were added to the solution dropwise at room temperature. The stirring was continued at the same temperature for 2 h. After the reaction was complete, as indicated by TLC, stirring was stopped and was washed with water. The organic layer was then concentrated under reduced pressure to give  $\alpha,\alpha$ -dimethoxy methyl aryl ketone. The crude product was then subjected to the next step without further purification.

$\alpha,\alpha$ -dimethoxymethyl aryl ketone (16.50 mmol, 1 equiv) was taken in a 100 mL round bottom flask and 30 mL of EtOH was added. The solution was cooled to 0 °C and NaBH<sub>4</sub> (1.25 g, 33 mmol, 2 equiv) was added portion wise. The reaction was then allowed to warm to room temperature and stirring was continued for 1 h. After the completion of reaction, as indicated by TLC (KMnO<sub>4</sub> was used for product confirmation), it was quenched with the addition of saturated solution of NH<sub>4</sub>Cl. The reaction mixture was extracted with DCM and then the organic layer was collected and dried over Na<sub>2</sub>SO<sub>4</sub>. The solvent was removed under reduced pressure and the crude residue was then further purified by column chromatography over silica-gel to afford the expected products in good over three steps.

### 3.1: Properties of synthesized compounds 1:

#### 2,2-Dimethoxy-1-phenylethan-1-ol (1a)

Yield: 64% (1.94 g); viscous liquid;  $R_f=0.3$  in 20% EtOAc; IR ( $\nu_{\max}$ , cm<sup>-1</sup>): 3445, 2899, 2831,

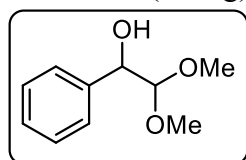

1452, 1194, 1061, 972, 755, 699. <sup>1</sup>H NMR (400 MHz, CDCl<sub>3</sub>, 24 °C):  $\delta$  7.40 (d,  $J = 8.0$  Hz, 2H), 7.34 (t,  $J = 7.6$  Hz, 2H), 7.29 (d,  $J = 7.2$  Hz, 1H), 4.60 (d,  $J = 6.4$  Hz, 1H), 4.28 (d,  $J = 6.4$  Hz, 1H), 3.45 (s, 3H), 3.40 (s, 1H), 3.24 (s, 3H). <sup>13</sup>C {<sup>1</sup>H} NMR (100 MHz, CDCl<sub>3</sub>, 24 °C):  $\delta$  139.5, 128.2, 127.9, 127.1, 107.6, 74.0, 55.9, 54.9.; HRMS (ESI/Q-TOF)  $m/z$ : [M + Na]<sup>+</sup> Calcd for C<sub>10</sub>H<sub>14</sub>O<sub>3</sub>+Na: 205.0841; found: 205.0831.

### 2,2-Dimethoxy-1-(4-methoxyphenyl)ethan-1-ol (1b)

Yield: 66% (2.33 g); viscous liquid;  $R_f=0.2$  in 20% EtOAc; IR ( $\nu_{\max}$ ,  $\text{cm}^{-1}$ ): 3461, 2943, 2832,

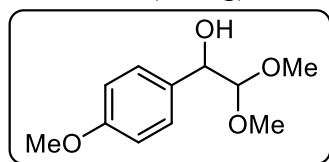

1609, 1510, 1245, 1028, 830, 755.  $^1\text{H}$  NMR (400 MHz,  $\text{CDCl}_3$ , 24  $^\circ\text{C}$ ):  $\delta$  7.32 (d,  $J = 8.6$  Hz, 2H), 6.88 (d,  $J = 8.6$  Hz, 2H), 4.55 (d,  $J = 6.4$  Hz, 1H), 4.26 (d,  $J = 6.6$  Hz, 1H), 3.79 (s, 3H), 3.46 (s, 3H), 3.25 (s, 3H), 2.74 (s, 1H).  $^{13}\text{C}\{^1\text{H}\}$  NMR (100 MHz,  $\text{CDCl}_3$ , 24  $^\circ\text{C}$ ):  $\delta$  159.3, 131.6, 128.3, 113.7, 107.8, 73.6, 55.9, 55.2, 54.9.; HRMS (ESI/Q-TOF)  $m/z$ :  $[\text{M} + \text{Na}]^+$  Calcd for  $\text{C}_{11}\text{H}_{16}\text{O}_4 + \text{Na}$ : 235.0946; found: 235.0938.

### 2,2-Dimethoxy-1-(4-nitrophenyl)ethan-1-ol (1c)

Yield: 50% (1.89 g); Solid; m.p. 65- 67  $^\circ\text{C}$ ;  $R_f=0.2$  in 20% EtOAc;

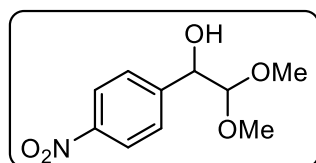

IR ( $\nu_{\max}$ ,  $\text{cm}^{-1}$ ): 3422, 2943, 1602, 1518, 1343, 1073, 856, 754, 711.  $^1\text{H}$  NMR (400 MHz,  $\text{CDCl}_3$ , 24  $^\circ\text{C}$ ):  $\delta$  8.21 (d,  $J = 8.0$  Hz, 2H), 7.61 (d,  $J = 8.0$  Hz, 2H), 4.73 (d,  $J = 6.3$  Hz, 1H), 4.25 (d,  $J = 6.3$  Hz, 1H), 3.49 (s, 3H), 3.32 (s, 3H), 2.84 (s, 1H).  $^{13}\text{C}\{^1\text{H}\}$  NMR (100 MHz,  $\text{CDCl}_3$ , 24  $^\circ\text{C}$ ):  $\delta$  147.7, 146.8, 128.0, 123.4, 107.2, 73.2, 56.5, 55.1.; HRMS (ESI/Q-TOF)  $m/z$ :  $[\text{M} + \text{Na}]^+$  Calcd for  $\text{C}_{10}\text{H}_{13}\text{NO}_5 + \text{Na}$ : 250.0691; found: 239.0684.

### 2,2-Dimethoxy-1-(2-methoxyphenyl)ethan-1-ol (1d)

Yield: 75% (2.64 g); viscous liquid;  $R_f=0.2$  in 20% EtOAc; IR ( $\nu_{\max}$ ,  $\text{cm}^{-1}$ ): 3475, 2941, 1240,

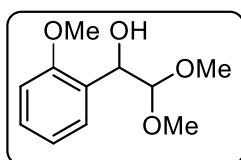

1057, 974, 754.  $^1\text{H}$  NMR (400 MHz,  $\text{CDCl}_3$ , 24  $^\circ\text{C}$ ):  $\delta$  7.39 (d,  $J = 7.4$  Hz, 1H), 7.28- 7.24 (m, 1H), 6.97 (t,  $J = 7.4$  Hz, 1H), 6.88 (d,  $J = 8.2$  Hz, 1H), 5.00 (s, 1H), 4.52 (d,  $J = 5.2$  Hz, 1H), 3.84 (s, 3H), 3.40 (s, 3H), 3.32 (s, 3H), 2.94 (s, 1H).  $^{13}\text{C}\{^1\text{H}\}$  NMR (100 MHz,  $\text{CDCl}_3$ , 24  $^\circ\text{C}$ ):  $\delta$  156.9, 128.9, 128.3, 127.9, 120.8, 110.6, 105.9, 70.0, 55.5, 55.2, 55.0.; HRMS (ESI/Q-TOF)  $m/z$ :  $[\text{M} + \text{Na}]^+$  Calcd for  $\text{C}_{11}\text{H}_{16}\text{O}_4 + \text{Na}$ : 235.0946; found: 235.0947.

### 1-(Furan-2-yl)-2,2-dimethoxyethan-1-ol (1e):

Yield: 62% (1.77 g); viscous liquid;  $R_f=0.3$  in 20% EtOAc; IR ( $\nu_{\max}$ ,  $\text{cm}^{-1}$ ):

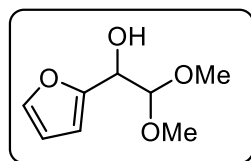

3441, 2940, 2833, 1126, 1064, 970, 745.  $^1\text{H}$  NMR (500 MHz,  $\text{CDCl}_3$ , 24  $^\circ\text{C}$ ):  $\delta$  7.39 (d,  $J = 0.9$  Hz, 1H), 6.35-6.34 (m, 2H), 4.65 (d,  $J = 6.3$  Hz, 1H), 4.56 (dd,  $J = 6.3, 1.5$  Hz, 1H), 3.47 (d,  $J = 1.8$  Hz, 3H), 3.33 (d,  $J = 1.8$  Hz, 3H), 2.74 (d,  $J = 1.2$  Hz, 1H).  $^{13}\text{C}\{^1\text{H}\}$  NMR (125 MHz,  $\text{CDCl}_3$ , 24  $^\circ\text{C}$ ):  $\delta$

152.5, 142.4, 110.4, 108.3, 105.2, 68.0, 55.5, 55.1.; HRMS (ESI/Q-TOF)  $m/z$ :  $[M + Na]^+$  Calcd for  $C_8H_{12}O_4+Na$ : 195.0633; found: 195.0629.

#### 1-(4-Fluorophenyl)-2,2-dimethoxyethan-1-ol(1f):

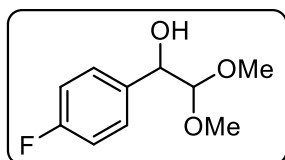

Yield: 52% (1.73 g); viscous liquid;  $R_f=0.3$  in 20% EtOAc; IR ( $\nu_{max}$ ,  $cm^{-1}$ ): 3453, 2941, 1509, 1221, 1065, 973, 835, 754.  $^1H$  NMR (400 MHz,  $CDCl_3$ , 24 °C):  $\delta$  7.39- 7.35 (m, 2H), 7.02 (t,  $J = 8.7$  Hz, 2H), 4.57 (d,  $J = 6.3$  Hz, 1H), 4.22 (d,  $J = 6.5$  Hz, 1H), 3.45 (s, 3H), 3.25 (s, 3H), 2.86 (s, 1H).  $^{13}C\{^1H\}$  NMR (100 MHz,  $CDCl_3$ , 24 °C):  $\delta$  163.7, 161.3, 135.3, 135.2, 128.8, 128.7, 115.2, 115.0, 107.7, 73.4, 56.1, 55.0.; HRMS (ESI/Q-TOF)  $m/z$ :  $[M + Na]^+$  Calcd for  $C_{10}H_{13}FO_3+Na$ : 223.0746; found: 223.0739.

#### 2,2-Dimethoxy-1-(4-(trifluoromethyl)phenyl)ethan-1-ol (1g):

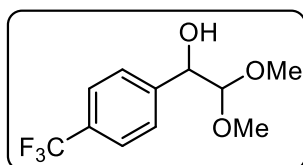

Yield: 65% (2.70 g); viscous liquid;  $R_f=0.3$  in 20% EtOAc; IR ( $\nu_{max}$ ,  $cm^{-1}$ ): 3452, 2944, 1322, 1117, 1059, 974, 839, 756.  $^1H$  NMR (400 MHz,  $CDCl_3$ , 24 °C):  $\delta$  7.60 (d,  $J = 8.2$  Hz, 2H), 7.54 (d,  $J = 8.0$  Hz, 2H), 4.67 (d,  $J = 6.2$  Hz, 1H), 4.25 (d,  $J = 6.3$  Hz, 1H), 3.47 (s, 3H), 3.29 (s, 3H), 2.91 (s, 1H).  $^{13}C\{^1H\}$  NMR (100 MHz,  $CDCl_3$ , 24 °C):  $\delta$  143.5, 127.5, 125.22, 125.18, 125.14, 125.11, 107.4, 73.4, 56.3, 55.0.; HRMS (ESI/Q-TOF)  $m/z$ :  $[M + Na]^+$  Calcd for  $C_{11}H_{13}F_3O_3+Na$ : 273.0714; found: 273.0704.

#### 4: Properties of synthesized compounds 2:

##### 1-(2-Aminophenyl)-2-methylpropan-1-one (2b):

Yield: 85% (0.35 g); viscous liquid;  $R_f=0.5$  in 5% EtOAc; IR ( $\nu_{max}$ ,  $cm^{-1}$ ): 3463, 3341, 2971, 1640, 1578, 1217, 1153, 970, 748.  $^1H$  NMR (400 MHz,  $CDCl_3$ , 24 °C):  $\delta$  7.76 (d,  $J = 8.1$  Hz, 1H), 7.26-7.23 (m, 1H), 6.66- 6.63 (m, 2H), 6.27 (s, 1.6 H), 3.59 (m, 1H), 1.20 (d,  $J = 6.7$  Hz, 6H).  $^{13}C\{^1H\}$  NMR (100 MHz,  $CDCl_3$ , 24 °C):  $\delta$  207.1, 151.0, 134.1, 131.1, 117.6, 117.0, 115.8, 35.3, 19.7.; HRMS (ESI/Q-TOF)  $m/z$ :  $[M + Na]^+$  Calcd for  $C_{10}H_{13}NO+Na$ : 186.0895; found: 186.0884.

**(2-Aminophenyl)(cyclopentyl)methanone(2d):**

Yield: 14% (68 mg); viscous liquid;  $R_f = 0.5$  in 5% EtOAc; IR ( $\nu_{\max}$ ,  $\text{cm}^{-1}$ ): 3465, 3341, 2949,

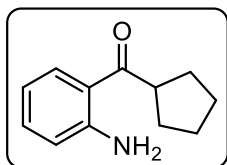

1639, 1571, 1213, 1156, 748.  $^1\text{H NMR}$  (400 MHz,  $\text{CDCl}_3$ , 24 °C):  $\delta$  7.77 (d,  $J = 8.1$  Hz, 1H), 7.23 (t,  $J = 7.5$  Hz, 1H), 6.65- 6.62 (m, 2H), 6.27 (s, 2H), 3.74-3.66 (m, 1H), 1.92- 1.87 (m, 4H), 1.75- 1.60 (m, 4H).  $^{13}\text{C}\{^1\text{H}\}$  NMR (100 MHz,  $\text{CDCl}_3$ , 24 °C):  $\delta$  205.5, 150.7, 133.9, 131.4, 117.8, 117.4,

115.7, 46.7, 30.4, 26.3.; HRMS (ESI/Q-TOF)  $m/z$ :  $[\text{M} + \text{Na}]^+$  Calcd for  $\text{C}_{12}\text{H}_{15}\text{NO} + \text{Na}$ : 212.1051; found: 212.1045.

**Optimization: Synthesis of 3a from 1a and 2a**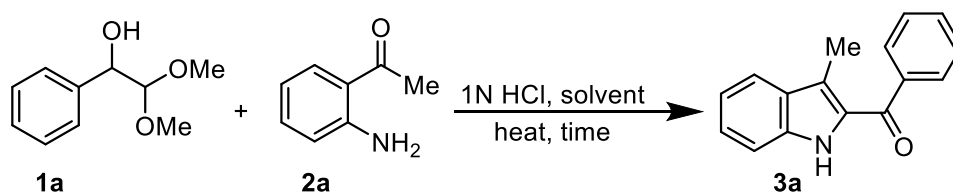

| Entry           | Acids (equiv)     | Temp (°C)  | Solvent                | Yield (%) |
|-----------------|-------------------|------------|------------------------|-----------|
| 1               | -                 | rt         | EtOH                   | -         |
| 2               | AcOH (1)          | rt         | EtOH                   | -         |
| 3               | PTSA (1)          | rt         | EtOH                   | -         |
| 4               | 1N HCl (2)        | rt         | EtOH                   | 34        |
| 5               | 1N HCl (2)        | 60         | EtOH                   | 50        |
| 6               | 1N HCl (2)        | 80         | EtOH                   | 83        |
| 7               | 1N HCl (2)        | 90         | EtOH                   | 84        |
| 8               | 1N HCl (2)        | 90         | Dioxane                | 90        |
| 9               | 1N HCl (2)        | 90         | $\text{CH}_3\text{CN}$ | 87        |
| 10              | <b>1N HCl (2)</b> | <b>100</b> | <b>Dioxane</b>         | <b>94</b> |
| 11              | 1N HCl (2)        | 120        | Dioxane                | 93        |
| 12              | Conc. HCl (2)     | 120        | Toluene                | 65        |
| 13 <sup>a</sup> | Conc. HCl (2)     | 120        | Toluene                | 76        |
| 14 <sup>b</sup> | Conc. HCl (2)     | 120        | Toluene                | 79        |
| 15 <sup>c</sup> | Conc. HCl (2)     | 120        | Toluene                | 74        |
| 16              | Conc. HCl (2)     | 90         | Toluene                | 29        |

|    |                                    |     |                  |    |
|----|------------------------------------|-----|------------------|----|
| 17 | Conc. HCl (2)                      | 130 | DMF              | 57 |
| 18 | H <sub>2</sub> SO <sub>4</sub> (2) | 80  | EtOH             | 35 |
| 19 | PTSA (1)                           | 80  | EtOH             | 60 |
| 20 | Conc. HCl (2)                      | 70  | MeOH             | 36 |
| 21 | 1N HCl (2)                         | 90  | H <sub>2</sub> O | 66 |

Reaction conditions: **1a** (0.23 mmol, 1 equiv), **2a** (0.23 mmol, 1 equiv), acid (equiv), solvent (3 mL for 0.23 mmol), temp, 18 h. Additive: <sup>a</sup> BF<sub>3</sub>.Et<sub>2</sub>O (0.5 equiv), <sup>b</sup> FeCl<sub>3</sub> (0.5 equiv), <sup>c</sup> ZnCl<sub>2</sub> (0.5 equiv).

## 5. General procedure for synthesis of 2-acyl indole derivatives **3**

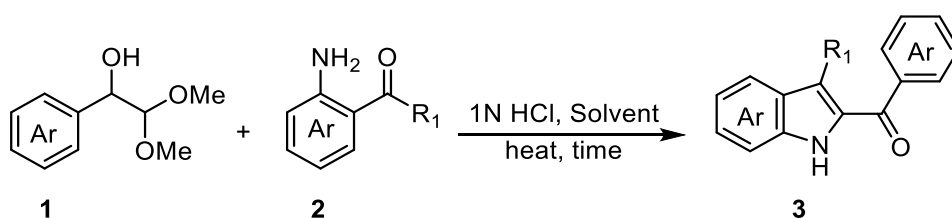

In an oven dried 20 mL reaction tube, compound **1** (0.23 mmol, 1 equiv), and  $\alpha$ -aminocarbonyl derivative **2** (0.23 mmol, 1 equiv) were taken in dioxane solvent (3 mL) and 0.5 mL of 1N HCl (2 equiv) was added. The reaction tube was sealed and kept in a pre-heated oil bath at 100 °C and stirred at the same temperature for 18 h. After consumption of starting material as indicated by TLC, reaction mixture was cooled down to room temperature and extracted with DCM. The organic layer was dried over Na<sub>2</sub>SO<sub>4</sub> and evaporated in rotary evaporator. The crude product was then further purified by column chromatography using ethyl acetate: hexane (1:9) as an eluting solvent to afford the 2-acylindole **3** in good to excellent yields.

### 5.1. Synthesis of compound **3c**

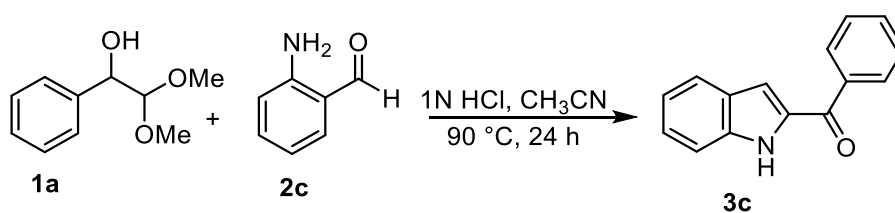



In an oven dried reaction tube, compound **2c** (50 mg, 0.41 mmol, 1 equiv) was taken in 3 mL of acetonitrile and **1a** (76 mg, 0.41 mmol, 1 equiv) was added. To the reaction mixture, 0.5 mL of 1N HCl (2 equiv) was added and the reaction tube was sealed and kept in a pre-heated oil bath at 90 °C and was stirred for 24 h at the same temperature. After the reaction was completed, as indicated by TLC, it was cooled down to room temperature and extracted with DCM. The organic layer was then dried over Na<sub>2</sub>SO<sub>4</sub> and evaporated under reduced pressure. The crude residue was then purified by column chromatography to afford the product **3c** in 72% (65 mg) yield.

## 5.2. Properties of synthesized 2-acyl indoles:

### (3-Methyl-1H-indol-2-yl)(phenyl)methanone (**3a**):

Yield: 87% (47 mg); White solid; m.p. 105-107 °C; *R<sub>f</sub>*=0.5 in 15% EtOAc; IR (*v*<sub>max</sub>, cm<sup>-1</sup>):

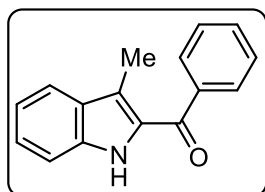

3311, 3054, 1607, 1435, 1266, 945, 742, 690. <sup>1</sup>H NMR (400 MHz, CDCl<sub>3</sub>, 24 °C): δ 8.84 (s, 1H), 7.77 (d, *J* = 7.1 Hz, 2H), 7.68 (d, *J* = 8.2 Hz, 1H), 7.59 (t, *J* = 7.1 Hz, 1H), 7.51 (t, *J* = 7.6 Hz, 2H), 7.41-7.35 (m, 2H), 7.16 (t, *J* = 7.2 Hz, 1H), 2.27 (s, 3H). <sup>13</sup>C{<sup>1</sup>H} NMR (100

MHz, CDCl<sub>3</sub>, 24 °C): δ 189.5, 139.5, 136.7, 132.0, 131.7, 129.0, 128.9, 128.5, 126.6, 121.3, 120.6, 120.2, 112.0, 11.3.; HRMS (ESI/Q-TOF) *m/z*: [M + Na]<sup>+</sup> Calcd for C<sub>16</sub>H<sub>13</sub>NO+Na: 258.0895; found: 258.0877.

### (3-Isopropyl-1H-indol-2-yl)(phenyl)methanone (**3b**):

Yield: 84% (51 mg); Solid; m.p. 75-77 °C; *R<sub>f</sub>* = 0.5 in 15% EtOAc; IR (*v*<sub>max</sub>, cm<sup>-1</sup>): 3335, 2969,

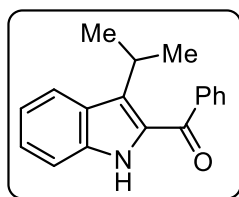

1618, 1524, 1322, 1256, 734, 702. <sup>1</sup>H NMR (400 MHz, CDCl<sub>3</sub>, 24 °C): δ 8.91 (s, 1H), 7.92 (d, *J* = 8.8 Hz, 1H), 7.81 (d, *J* = 7.1 Hz, 2H), 7.60 (t, *J* = 7.1 Hz, 1H), 7.51 (t, *J* = 7.2 Hz, 2H), 7.41 (d, *J* = 8.2 Hz, 1H), 7.33 (t, *J* = 7.7 Hz, 1H), 7.13 (t, *J* = 8.0 Hz, 1H), 3.27 (m, 1H), 1.41 (d, *J* = 7.1 Hz,

6H). <sup>13</sup>C{<sup>1</sup>H} NMR (100 MHz, CDCl<sub>3</sub>, 24 °C): δ 189.9, 139.7, 137.3, 132.3, 131.0, 130.3, 128.9, 128.4, 126.5, 125.8, 123.5, 119.8, 112.4, 26.3, 23.0.; HRMS (ESI/Q-TOF) *m/z*: [M + Na]<sup>+</sup> Calcd for C<sub>18</sub>H<sub>17</sub>NO+Na: 286.1208; found: 286.1193

**(1H-Indol-2-yl)(phenyl)methanone (3c):**

Yield: 72% (65 mg); White Solid; m.p. 130-132 °C;  $R_f=0.5$  in 15% EtOAc; IR ( $\nu_{\max}$ ,  $\text{cm}^{-1}$ ):

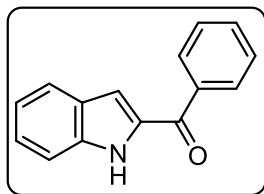

3313, 2920, 1619, 1516, 1261, 735, 684.  $^1\text{H}$  NMR (400 MHz,  $\text{CDCl}_3$ , 24 °C):  $\delta$  9.47 (s, 1H), 8.00 (d,  $J = 7.8$  Hz, 2H), 7.72 (d,  $J = 8.0$  Hz, 1H), 7.63 (t,  $J = 7.5$  Hz, 1H), 7.56- 7.48 (m, 3H), 7.38 (t,  $J = 7.8$  Hz, 1H), 7.19-7.15 (m, 2H).  $^{13}\text{C}\{^1\text{H}\}$  NMR (100 MHz,  $\text{CDCl}_3$ , 24 °C):  $\delta$  187.3, 138.1, 137.6, 134.4, 132.4, 129.3, 128.6, 127.8, 126.6, 123.3, 121.1, 112.9, 112.3.; HRMS (ESI/Q-TOF)  $m/z$ :  $[\text{M} + \text{Na}]^+$  Calcd for  $\text{C}_{15}\text{H}_{11}\text{NO}+\text{Na}$ : 244.0738; found: 244.0725.

**(3-Cyclopentyl-1H-indol-2-yl)(phenyl)methanone (3d):**

Yield: 86% (57 mg); Solid; Melting point; 105-107 °C;  $R_f = 0.5$  in 15% EtOAc; IR ( $\nu_{\max}$ ,  $\text{cm}^{-1}$ ):

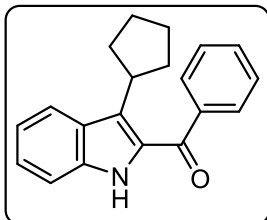

$^1$ ): 3330, 2950, 2868, 1613, 1523, 1324, 1252, 733, 695.  $^1\text{H}$  NMR (400 MHz,  $\text{CDCl}_3$ , 24 °C):  $\delta$  8.72 (s, 1H), 7.80 (d,  $J = 7.8$  Hz, 3H), 7.59 (t,  $J = 7.2$  Hz, 1H), 7.50 (t,  $J = 7.7$  Hz, 2H), 7.41 (d,  $J = 8.1$  Hz, 1 H), 7.33 (t,  $J = 8.1$  Hz, 1H), 7.10 (t,  $J = 7.9$  Hz, 1H), 3.24-3.15 (m, 1 H), 2.08-1.99 (m, 2H), 1.91- 1.89 (m, 4H), 1.56-1.54 (m, 2H).  $^{13}\text{C}\{^1\text{H}\}$  NMR (100 MHz,  $\text{CDCl}_3$ , 24 °C):  $\delta$  189.9, 139.7, 137.3, 132.3, 131.4, 129.1, 128.8, 128.4, 126.4, 125.9, 123.0, 119.8, 112.4, 37.5, 33.7, 26.8.; HRMS (ESI/Q-TOF)  $m/z$ :  $[\text{M} + \text{Na}]^+$  Calcd for  $\text{C}_{20}\text{H}_{19}\text{NO}+\text{Na}$ : 312.1364; found: 312.1352.

**(E)-Phenyl(3-styryl-1H-indol-2-yl)methanone (3e):**

Yield: 71% (52 mg); Solid; m.p. 150-152 °C;  $R_f=0.45$  in 15% EtOAc; IR ( $\nu_{\max}$ ,  $\text{cm}^{-1}$ ): 3313,

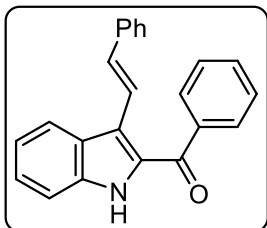

3056, 1611, 1501, 1330, 1252, 736, 695.  $^1\text{H}$  NMR (400 MHz,  $\text{CDCl}_3$ , 24 °C):  $\delta$  9.22 (s, 1H), 8.11 (d,  $J = 8.3$  Hz, 1H), 7.83 (d,  $J = 7.0$  Hz, 2H), 7.60 (t,  $J = 7.5$  Hz, 1H), 7.51- 7.38 (m, 4H), 7.28-7.24 (m, 3H), 7.22-7.08 (m, 5H).  $^{13}\text{C}\{^1\text{H}\}$  NMR (100 MHz,  $\text{CDCl}_3$ , 24 °C):  $\delta$  188.9, 139.3, 137.7, 137.2, 132.3, 132.0, 131.2, 129.5, 128.7, 128.6, 127.6, 126.8, 126.2, 123.0, 121.9, 121.5, 112.4.; HRMS (ESI/Q-TOF)  $m/z$ :  $[\text{M} + \text{Na}]^+$  Calcd for  $\text{C}_{23}\text{H}_{17}\text{NO}+\text{Na}$ : 346.1208; found: 346.1188.

### Phenyl(3-phenyl-1H-indol-2-yl)methanone (3f):

Yield: 96% (65 mg); Solid; m.p. 170-172 °C;  $R_f=0.5$  in 15% EtOAc; IR ( $\nu_{\max}$ ,  $\text{cm}^{-1}$ ): 3312,

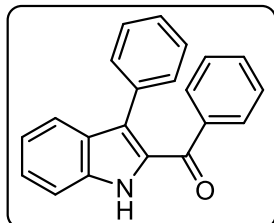

3057, 1610, 1333, 1262, 743, 685.  $^1\text{H}$  NMR (400 MHz,  $\text{CDCl}_3$ , 24 °C):  $\delta$  9.33 (s, 1H), 7.65 (d,  $J = 8.3$  Hz, 1H), 7.46 – 7.42 (m, 3H), 7.33 (t,  $J = 7.7$  Hz, 1H), 7.20-7.16 (m, 1H), 7.12- 7.09 (m, 3H), 7.05- 7.04 (m, 3H), 6.99 (t,  $J = 7.5$  Hz, 2H).  $^{13}\text{C}\{^1\text{H}\}$  NMR (100 MHz,  $\text{CDCl}_3$ , 24 °C):

$\delta$  189.6, 137.5, 136.4, 133.7, 131.7, 130.8, 129.5, 127.9, 127.6, 127.5, 126.8, 126.6, 125.3, 122.1, 121.1, 112.0.; HRMS (ESI/Q-TOF)  $m/z$ :  $[\text{M} + \text{Na}]^+$  Calcd for  $\text{C}_{21}\text{H}_{15}\text{NO}+\text{Na}$ : 320.1051; found: 320.1032

### (3-(4-Bromophenyl)-1H-indol-2-yl)(phenyl)methanone (3g):

Yield: 96% (83 mg); Solid; m.p. 150-152 °C;  $R_f=0.5$  in 15% EtOAc; IR ( $\nu_{\max}$ ,  $\text{cm}^{-1}$ ): 3335,

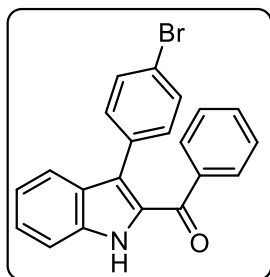

2927, 1630, 805, 729, 696.  $^1\text{H}$  NMR (400 MHz,  $\text{CDCl}_3$ , 24 °C):  $\delta$  9.39 (s, 1H), 7.68 (d,  $J = 8.0$  Hz, 1H), 7.52 (d,  $J = 6.8$  Hz, 3H), 7.43 (t,  $J = 7.2$  Hz, 1H), 7.35 (t,  $J = 7.6$  Hz, 1H), 7.27 (d,  $J = 2.9$  Hz, 1H), 7.21 (t,  $J = 7.2$  Hz, 1H), 7.13 (t,  $J = 7.8$  Hz, 2H). 7.06 (d,  $J = 8.2$  Hz, 2H).  $^{13}\text{C}\{^1\text{H}\}$  NMR (100 MHz,  $\text{CDCl}_3$ , 24 °C):  $\delta$  189.4, 137.5, 136.4, 132.8,

132.4, 132.0, 131.2, 131.0, 129.5, 127.8, 127.5, 126.8, 123.9, 121.8, 121.5, 121.1, 112.2.; HRMS (ESI/Q-TOF)  $m/z$ :  $[\text{M} + \text{H}]^+$  Calcd for  $\text{C}_{21}\text{H}_{14}\text{BrNO}+\text{H}$ : 376.0337; found: 376.0309

### Phenyl(3-(thiophen-2-yl)-1H-indol-2-yl)methanone (3h):

Yield: 81% (57 mg); Solid; m.p. 135- 137 °C;  $R_f = 0.5$  in 15% EtOAc; IR ( $\nu_{\max}$ ,  $\text{cm}^{-1}$ ): 3293,

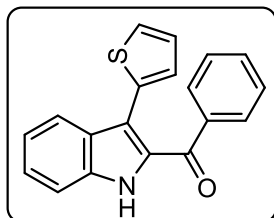

3054, 1617, 1323, 1250, 1000, 730, 655.  $^1\text{H}$  NMR (500 MHz,  $\text{CDCl}_3$ , 24 °C):  $\delta$  9.57 (s, 1H), 7.93 (d,  $J = 8.0$  Hz, 1H), 7.73-7.71 (m, 2H), 7.57 (dd,  $J = 8.3, 0.8$  Hz, 1H), 7.48 (td,  $J = 8.2, 0.9$  Hz, 1H), 7.44-7.40 (m, 1H), 7.32-7.24 (m, 4H), 6.87-6.85 (m, 1H), 6.83 (dd,  $J = 3.4, 1.1$  Hz,

1H).  $^{13}\text{C}\{^1\text{H}\}$  NMR (125 MHz,  $\text{CDCl}_3$ , 24 °C):  $\delta$  189.4, 137.7, 136.3, 134.6, 132.0, 131.6, 129.3, 128.9, 128.0, 127.8, 127.1, 126.8, 126.5, 122.3, 121.5, 117.2, 112.1; HRMS (ESI/Q-TOF)  $m/z$ :  $[\text{M} + \text{Na}]^+$  Calcd for  $\text{C}_{19}\text{H}_{13}\text{NOS}+\text{Na}$ : 326.0616; found: 326.0598.

**(6-Methyl-3-phenyl-1H-indol-2-yl)(phenyl)methanone (3i):**

Yield: 84% (60 mg); Solid; m.p. 160-162 °C;  $R_f=0.5$  in 15% EtOAc; IR ( $\nu_{\max}$ ,  $\text{cm}^{-1}$ ): 3308,

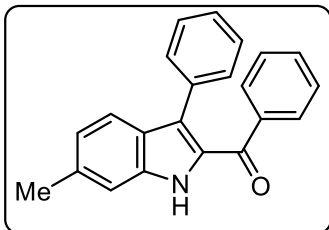

2923, 1607, 1258, 734, 688.  $^1\text{H}$  NMR (500 MHz,  $\text{CDCl}_3$ , 24 °C):  $\delta$  9.37 (s, 1H), 7.60 (d,  $J = 8.2$  Hz, 1H), 7.52 (dd,  $J = 8.1, 1.1$  Hz, 2H), 7.28 (s, 1H), 7.26-7.23 (m, 1H), 7.19-7.17 (m, 2H), 7.13-7.11 (m, 3H), 7.06 (t,  $J = 8.0$  Hz, 2H), 7.02 (d,  $J = 8.0$  Hz, 1H), 2.51 (s, 3H).  $^{13}\text{C}\{^1\text{H}\}$  NMR (125 MHz,  $\text{CDCl}_3$ , 24 °C):  $\delta$  189.5, 137.8,

137.1, 137.0, 134.0, 131.6, 130.9, 130.6, 129.5, 127.9, 127.6, 126.8, 125.8, 125.7, 123.4, 121.9, 111.6, 22.1.; HRMS (ESI/Q-TOF)  $m/z$ :  $[\text{M} + \text{H}]^+$  Calcd for  $\text{C}_{22}\text{H}_{17}\text{NO} + \text{H}$ : 312.1388; found 312.1374.

**(5-Chloro-3-phenyl-1H-indol-2-yl)(phenyl)methanone (3j):**

Yield: 93% (71 mg); Solid; m.p. 150-152 °C;  $R_f=0.5$  in 15% EtOAc; IR ( $\nu_{\max}$ ,  $\text{cm}^{-1}$ ): 3305,

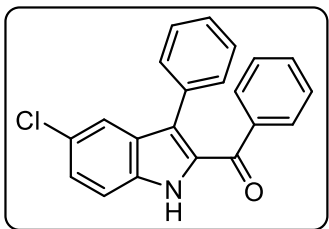

2922, 1625, 1255, 798, 732, 692.  $^1\text{H}$  NMR (400 MHz,  $\text{CDCl}_3$ , 24 °C):  $\delta$  9.47 (s, 1H), 7.68 (s, 1H), 7.51 (d,  $J = 7.6$  Hz, 2H), 7.44 (d,  $J = 8.8$  Hz, 1H), 7.35 (dd,  $J = 8.8, 1.9$  Hz, 1H), 7.27 (d,  $J = 7.7$  Hz, 1H), 7.16-7.12 (m, 5H), 7.07 (t,  $J = 7.5$  Hz, 2H).  $^{13}\text{C}\{^1\text{H}\}$  NMR (100 MHz,  $\text{CDCl}_3$ , 24 °C):  $\delta$  189.5, 137.2, 134.7, 133.2, 132.0,

131.9, 130.8, 129.6, 128.7, 128.2, 127.7, 127.2, 127.1, 127.0, 124.7, 121.4, 113.3.; HRMS (ESI/Q-TOF)  $m/z$ :  $[\text{M} + \text{H}]^+$  Calcd for  $\text{C}_{21}\text{H}_{14}\text{ClNO} + \text{H}$ : 332.0842; found 332.0822.

**(3,5-Diphenyl-1H-indol-2-yl)(phenyl)methanone (3k):**

Yield: 85% (73 mg); Solid; m.p. 180-182 °C;  $R_f=0.5$  in 15% EtOAc; IR ( $\nu_{\max}$ ,  $\text{cm}^{-1}$ ): 3308,

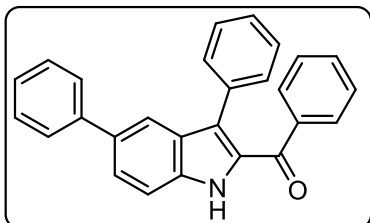

3017, 1709, 1357, 1223, 743, 695.  $^1\text{H}$  NMR (400 MHz,  $\text{CDCl}_3$ , 24 °C):  $\delta$  9.56 (s, 1H), 7.91 (s, 1H), 7.68 (d,  $J = 8.6$  Hz, 1H), 7.62-7.54 (m, 5H), 7.43 (t,  $J = 7.4$  Hz, 2H), 7.34-7.27 (m, 2H), 7.26-7.22 (m, 2H), 7.15-7.14 (m, 3H), 7.08 (t,  $J = 7.4$  Hz, 2H).

$^{13}\text{C}\{^1\text{H}\}$  NMR (100 MHz,  $\text{CDCl}_3$ , 24 °C):  $\delta$  189.6, 141.9, 137.6, 136.0, 134.9, 133.7, 131.8, 131.6, 131.0, 129.6, 128.8, 128.2, 128.1, 127.6, 127.4, 127.0, 126.8, 126.7, 125.7, 120.3, 112.4.; HRMS (ESI/Q-TOF)  $m/z$ :  $[\text{M} + \text{H}]^+$  Calcd for  $\text{C}_{27}\text{H}_{19}\text{NO} + \text{H}$ : 374.1545; found 374.1525.

**Phenyl(3-phenyl-5-(pyren-1-yl)-1H-indol-2-yl)methanone (3l):**

Yield: 96% (110 mg); Solid; m.p. 235- 237 °C;  $R_f=0.5$  in 15% EtOAc; IR ( $\nu_{\max}$ ,  $\text{cm}^{-1}$ ): 3318,

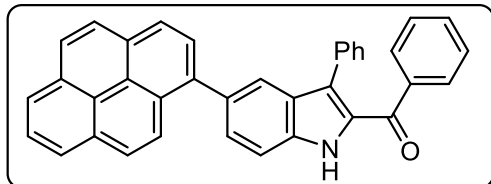

3046, 1617, 1265, 753, 697.  $^1\text{H}$  NMR (400 MHz,  $\text{CDCl}_3$ , 24 °C):  $\delta$  9.46 (s, 1H), 8.19- 8.14 (m, 4H), 8.08 (s, 2H), 8.01 (d,  $J = 8.1$  Hz, 3H), 7.96 (s, 1H), 7.69 (s, 2H), 7.57 (d,  $J = 7.2$  Hz, 2H), 7.29- 7.23 (m, 3H), 7.10-

7.07 (m, 5H).  $^{13}\text{C}\{^1\text{H}\}$  NMR (100 MHz,  $\text{CDCl}_3$ , 24 °C):  $\delta$  189.6, 138.3, 137.5, 135.8, 134.5, 133.6, 131.9, 131.6, 131.1, 131.0, 130.5, 129.8, 129.6, 128.8, 128.1, 127.7, 127.5, 127.4, 127.0, 126.1, 125.6, 125.5, 125.2, 125.1, 125.0, 124.8, 124.6, 123.7, 111.8.; HRMS (ESI/Q-TOF)  $m/z$ :  $[\text{M} + \text{Na}]^+$  Calcd for  $\text{C}_{37}\text{H}_{23}\text{NO}+\text{Na}$ :520.1677; found 520.1643.

**Phenyl(3-phenyl-5-(pyridin-3-yl)-1H-indol-2-yl)methanone (3m):**

Yield: 80% (69 mg); Solid; m.p. 210- 212 °C;  $R_f=0.2$  in 15% EtOAc; IR ( $\nu_{\max}$ ,  $\text{cm}^{-1}$ ): 3056,

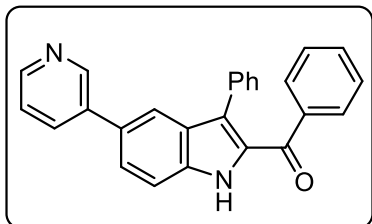

2926, 1700, 1628, 1267, 744, 701.  $^1\text{H}$  NMR (400 MHz,  $\text{CDCl}_3$ , 24 °C):  $\delta$  9.69 (s, 1H), 8.87 (s, 1H), 8.56 (s, 1H), 7.89 (d,  $J = 7.7$  Hz, 2H), 7.63 (s, 2H), 7.54 (d,  $J = 7.7$  Hz, 2H), 7.35 (d,  $J = 3.8$  Hz, 1H), 7.25-7.21 (m, 3H), 7.15 (s, 3H), 7.08 (t,  $J = 6.5$  Hz,

2H).  $^{13}\text{C}\{^1\text{H}\}$  NMR (100 MHz,  $\text{CDCl}_3$ , 24 °C):  $\delta$  189.6, 148.4, 147.9, 137.4, 136.2, 134.6, 133.5, 131.9, 131.8, 131.2, 130.9, 129.6, 128.4, 128.3, 128.2, 127.7, 127.1, 126.2, 125.5, 123.6, 120.7, 112.9.; HRMS (ESI/Q-TOF)  $m/z$ :  $[\text{M} + \text{H}]^+$  Calcd for  $\text{C}_{26}\text{H}_{18}\text{N}_2\text{O}+\text{H}$ :375.1497; found 375.1491.

**(1-Methyl-3-phenyl-1H-indol-2-yl)(phenyl)methanone(3n):**

Yield: 87% (63 mg); viscous liquid;  $R_f=0.7$  in 15% EtOAc; IR ( $\nu_{\max}$ ,  $\text{cm}^{-1}$ ): 3056, 2941, 1634,

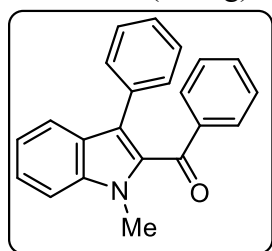

1251, 950, 730, 694.  $^1\text{H}$  NMR (400 MHz,  $\text{CDCl}_3$ , 24 °C):  $\delta$  7.78 (d,  $J = 8.1$  Hz, 1H), 7.70-7.67 (m, 2H), 7.50-7.42 (m, 2H), 7.31-7.20 (m, 4H), 7.14 (t,  $J = 7.3$  Hz, 4H), 7.08-7.05 (m, 1H), 3.97 (s, 3H).  $^{13}\text{C}\{^1\text{H}\}$  NMR (100 MHz,  $\text{CDCl}_3$ , 24 °C):  $\delta$  190.7, 138.7, 138.2, 134.0, 133.0, 132.6, 130.5, 130.2, 128.1, 127.9, 126.6, 125.9, 125.3, 123.6, 121.5,

121.0, 110.3, 31.7; HRMS (ESI/Q-TOF)  $m/z$ :  $[M + H]^+$  Calcd for  $C_{22}H_{17}NO+H$ : 312.1388; found 312.1371.

**(1-Allyl-3-phenyl-1H-indol-2-yl)(phenyl)methanone (3o):**

Yield: 51% (40 mg); viscous liquid;  $R_f=0.7$  in 15% EtOAc; IR ( $\nu_{max}$ ,  $cm^{-1}$ ): 3058, 2924, 1635,

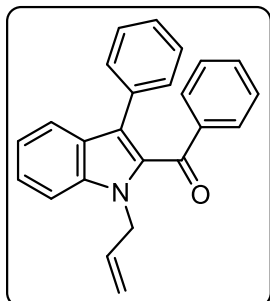

1259, 934, 730, 699.  $^1H$  NMR (400 MHz,  $CDCl_3$ , 24 °C):  $\delta$  7.78 (d,  $J$  = 8.1 Hz, 1H), 7.65 (d,  $J$  = 7.3 Hz, 2H), 7.48 (d,  $J$  = 8.4 Hz, 1H), 7.41 (t,  $J$  = 7.0 Hz, 1H), 7.29-7.20 (m, 4H), 7.14-7.09 (m, 4H), 7.05 (t,  $J$  = 7.2 Hz, 1H). 6.06-5.97 (m, 1H), 5.12-5.02 (m, 4H).  $^{13}C\{^1H\}$  NMR (100 MHz,  $CDCl_3$ , 24 °C):  $\delta$  190.8, 138.2, 138.1, 134.0, 133.9, 132.6, 130.5, 130.2, 128.1, 127.8, 126.6, 126.1, 125.4, 124.2, 121.6, 121.2,

116.8, 110.7, 46.9; HRMS (ESI/Q-TOF)  $m/z$ :  $[M + H]^+$  Calcd for  $C_{24}H_{19}NO+H$ : 338.1545; found 338.1522.

**(4-Methoxyphenyl)(3-phenyl-1H-indol-2-yl)methanone (3p):**

Yield: 97% (73 mg); Solid; m.p. 130-132 °C;  $R_f=0.3$  in 15% EtOAc; IR ( $\nu_{max}$ ,  $cm^{-1}$ ): 3308,

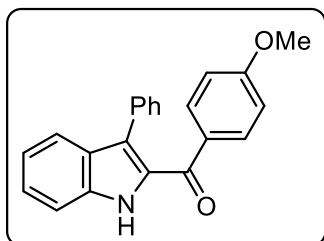

3056, 1596, 1250, 1161, 734, 703.  $^1H$  NMR (400 MHz,  $CDCl_3$ , 24 °C):  $\delta$  9.40 (s, 1H), 7.75 (d,  $J$  = 8.1 Hz, 1H), 7.56 (d,  $J$  = 8.8 Hz, 2H), 7.51 (d,  $J$  = 8.6 Hz, 1H), 7.39 (t,  $J$  = 7.9 Hz, 1H), 7.24 (d,  $J$  = 7.9, 2H), 7.20-7.14 (m, 4H), 6.57 (d,  $J$  = 8.7 Hz, 2H), 3.73 (s, 3H).  $^{13}C\{^1H\}$  NMR (100 MHz,  $CDCl_3$ , 24 °C):  $\delta$  188.3, 162.7,

136.3, 134.1, 132.1, 131.2, 131.0, 130.1, 128.1, 127.7, 126.8, 126.2, 124.4, 122.0, 121.1, 113.0, 112.0, 55.4.; HRMS (ESI/Q-TOF)  $m/z$ :  $[M + H]^+$  Calcd for  $C_{22}H_{17}NO_2+H$ : 328.1338; found 328.1324.

**(2-Methoxyphenyl)(3-phenyl-1H-indol-2-yl)methanone (3q):**

Yield: 88% (66 mg); Solid; m.p. 125-127 °C;  $R_f=0.3$  in 15% EtOAc; IR ( $\nu_{max}$ ,  $cm^{-1}$ ): 3319,

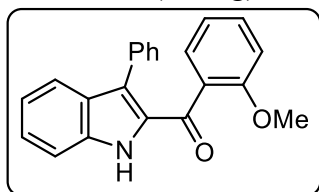

3058, 1610, 1250, 1025, 744, 701.  $^1H$  NMR (400 MHz,  $CDCl_3$ , 24 °C):  $\delta$  9.30 (s, 1H), 7.59 (d,  $J$  = 8.2 Hz, 1H), 7.47 (d,  $J$  = 8.2 Hz, 1H), 7.38 (t,  $J$  = 7.7 Hz, 1H), 7.21 (d,  $J$  = 7.8 Hz, 1H), 7.14-7.07 (m, 7H), 6.73 (t,  $J$  = 7.5 Hz, 1H), 6.43 (d,  $J$  = 8.5 Hz, 1H), 3.51 (s,

3H).  $^{13}C\{^1H\}$  NMR (100 MHz,  $CDCl_3$ , 24 °C):  $\delta$  188.4, 156.9, 136.3, 133.2, 131.9, 131.8,

130.5, 129.6, 128.9, 128.3, 127.3, 126.8, 126.7, 126.0, 122.4, 120.9, 120.0, 112.0, 110.3, 55.2.; HRMS (ESI/Q-TOF) m/z: [M + H]<sup>+</sup> Calcd for C<sub>22</sub>H<sub>17</sub>NO<sub>2</sub>+H:328.1338 found 328.1324.

**(4-Fluorophenyl)(3-phenyl-1H-indol-2-yl)methanone (3r):**

Yield: 96% (70 mg); Solid; m.p. 140-142 °C; *R<sub>f</sub>*=0.5 in 15% EtOAc; IR (ν<sub>max</sub>, cm<sup>-1</sup>): 3320,

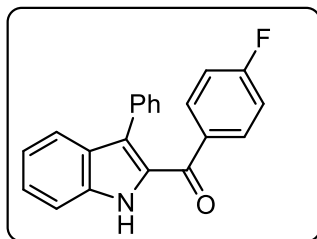

2925, 1598, 1230, 1152, 841, 741, 704. <sup>1</sup>H NMR (400 MHz, CDCl<sub>3</sub>, 24 °C): δ 9.75 (s, 1H), 7.74 (d, *J* = 8.1 Hz, 1H), 7.58- 7.52 (m, 3H), 7.42 (t, *J* = 7.8 Hz, 1H), 7.21-7.18 (m, 6H), 6.75 (t, *J* = 8.4 Hz, 2H). <sup>13</sup>C {<sup>1</sup>H} NMR (100 MHz, CDCl<sub>3</sub>, 24 °C): δ 188.3, 166.1, 163.6, 136.6, 133.8, 133.7, 132.2, 132.1, 131.0, 130.8,

128.1, 127.6, 127.1, 126.7, 125.5, 122.2, 121.3, 114.8, 114.6, 112.2.; HRMS (ESI/Q-TOF) m/z: [M + H]<sup>+</sup> Calcd for C<sub>21</sub>H<sub>14</sub>FNO+H: 316.1138 found 316.1121.

**(3-Phenyl-1H-indol-2-yl)(4-(trifluoromethyl)phenyl)methanone (3s):**

Yield: 84% (71 mg); Solid; m.p. 190-192 °C; *R<sub>f</sub>*=0.5 in 15% EtOAc; IR (ν<sub>max</sub>, cm<sup>-1</sup>): 3323,

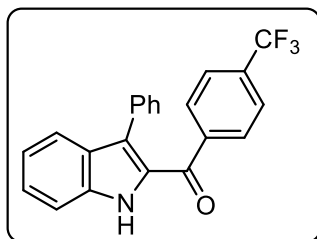

1737, 1614, 1324, 1119, 1066, 751. <sup>1</sup>H NMR (400 MHz, CDCl<sub>3</sub>, 24 °C): δ 9.41 (s, 1H), 7.66 (d, *J* = 8.2 Hz, 1H), 7.51- 7.46 (m, 3H), 7.39 (t, *J* = 8.2 Hz, 1H), 7.25 (d, *J* = 7.9 Hz, 2H), 7.15 (t, *J* = 7.4 Hz, 1H), 7.07 (s, 5H). <sup>13</sup>C {<sup>1</sup>H} NMR (100 MHz, CDCl<sub>3</sub>, 24 °C): δ 188.4, 140.9, 136.7, 133.3, 130.9, 130.6, 129.5, 128.1, 127.7,

127.3, 126.6, 124.6, 124.59, 124.56, 124.52, 122.4, 121.5, 112.2; HRMS (ESI/Q-TOF) m/z: [M + H]<sup>+</sup> Calcd for C<sub>22</sub>H<sub>14</sub>F<sub>3</sub>NO+H: 366.1106 found 366.1086.

**(4-Nitrophenyl)(3-phenyl-1H-indol-2-yl)methanone (3t):**

Yield: 84% (66 mg); Solid; m.p. 195-197 °C; *R<sub>f</sub>*=0.4 in 15% EtOAc; IR (ν<sub>max</sub>, cm<sup>-1</sup>): 3332,

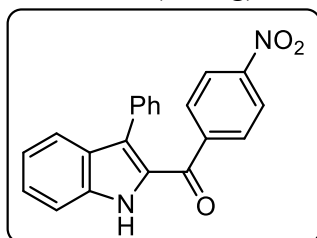

1719, 1519, 1345, 1222, 783, 732. <sup>1</sup>H NMR (400 MHz, CDCl<sub>3</sub>, 24 °C): δ 9.34 (s, 1H), 7.88 (d, *J* = 8.7 Hz, 2H), 7.70 (d, *J* = 8.2 Hz, 1H), 7.59 (d, *J* = 8.9 Hz, 2H), 7.52 (d, *J* = 8.2 Hz, 1H), 7.45 (t, *J* = 8.2 Hz, 1H), 7.20 (t, *J* = 8.0 Hz, 1H), 7.16- 7.09 (m, 5H). <sup>13</sup>C {<sup>1</sup>H} NMR (100 MHz, CDCl<sub>3</sub>, 24 °C): δ 187.5, 149.0, 143.2, 136.9,

133.1, 131.0, 130.4, 130.2, 128.2, 127.7, 127.66, 127.62, 126.9, 122.7, 122.5, 121.6, 112.2.; HRMS (ESI/Q-TOF) m/z: [M + Na]<sup>+</sup> Calcd for C<sub>21</sub>H<sub>14</sub>N<sub>2</sub>O<sub>3</sub>+Na: 365.0902 found 365.0882.

### Furan-2-yl(3-phenyl-1H-indol-2-yl)methanone (3u):

Yield: 85% (56 mg); Solid; m.p. 160-162 °C;  $R_f$ =0.5 in 15% EtOAc; IR ( $\nu_{\max}$ ,  $\text{cm}^{-1}$ ): 3315,

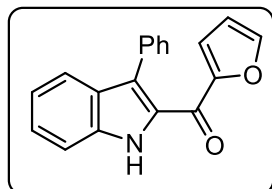

2924, 1590, 1454, 1267, 754, 693.  $^1\text{H}$  NMR (400 MHz,  $\text{CDCl}_3$ , 24 °C):  $\delta$  9.33 (s, 1H), 7.64 (d,  $J$  = 8.1 Hz, 1H), 7.40 (d,  $J$  = 8.2 Hz, 1H), 7.35-7.33 (m, 2H), 7.31-7.25 (m, 3H), 7.23-7.16 (m, 2H), 7.09 (t,  $J$  = 7.6 Hz, 1H), 6.74 (d,  $J$  = 3.5 Hz, 1H), 6.21 (dd,  $J$  = 3.5, 1.3 Hz, 1H).

$^{13}\text{C}\{^1\text{H}\}$  NMR (100 MHz,  $\text{CDCl}_3$ , 24 °C):  $\delta$  174.7, 151.9, 146.2, 136.4, 134.5, 130.5, 130.3, 128.4, 127.7, 127.2, 126.5, 124.8, 122.1, 121.3, 119.9, 112.1, 112.0.; HRMS (ESI/Q-TOF)  $m/z$ :  $[\text{M} + \text{H}]^+$  Calcd for  $\text{C}_{19}\text{H}_{13}\text{NO}_2 + \text{H}$ : 288.1025 found 288.1013.

### 2-Phenyl-1-(3-phenyl-1H-indol-2-yl)ethan-1-one (3v):

Yield: 88% (63 mg); Solid; m.p. 155-160 °C;  $R_f$ =0.5 in 15% EtOAc; IR ( $\nu_{\max}$ ,  $\text{cm}^{-1}$ ): 3443,

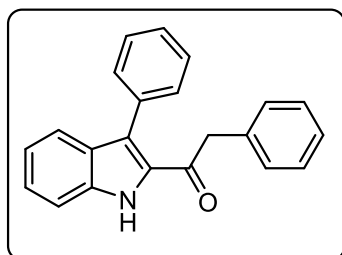

3056, 1647, 1265, 740, 462.  $^1\text{H}$  NMR (500 MHz,  $\text{CDCl}_3$ , 24 °C):  $\delta$  9.38 (s, 1H), 7.53-7.43 (m, 6H), 7.37-7.32 (m, 2H), 7.22-7.15 (m, 3H), 7.11-7.08 (m, 1H), 6.96-6.95 (m, 2H), 3.84 (s, 2H).

$^{13}\text{C}\{^1\text{H}\}$  NMR (125 MHz,  $\text{CDCl}_3$ , 24 °C):  $\delta$  191.6, 135.9, 134.4, 134.2, 131.5, 130.8, 129.3, 128.9, 128.6, 128.3, 128.0, 126.7, 126.6, 124.6, 122.1, 120.9, 111.8, 46.1.; HRMS (ESI/Q-TOF)  $m/z$ :  $[\text{M} + \text{H}]^+$  Calcd for  $\text{C}_{22}\text{H}_{17}\text{NO} + \text{H}$ : 312.1388 found 312.1387.

### 1-(3-Phenyl-1H-indol-2-yl)hexan-1-one (3w):

Yield: 89% (56 mg); Solid; m.p. 60-65 °C;  $R_f$ =0.6 in 15% EtOAc; IR ( $\nu_{\max}$ ,  $\text{cm}^{-1}$ ): 3439, 2929,

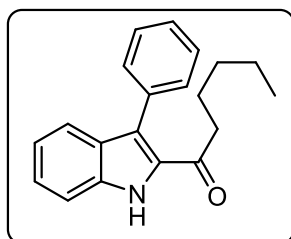

1643, 1487, 1265.  $^1\text{H}$  NMR (400 MHz,  $\text{CDCl}_3$ , 24 °C):  $\delta$  9.44 (s, 1H), 7.49-7.42 (m, 7H), 7.35 (t,  $J$  = 8.4 Hz, 1H), 7.10 (t,  $J$  = 7.2 Hz, 1H), 2.46 (t,  $J$  = 7.3 Hz, 2H), 1.57-1.50 (m, 2H), 1.17-1.03 (m, 4H), 0.79 (t,  $J$  = 7.2 Hz, 3H).  $^{13}\text{C}\{^1\text{H}\}$  NMR (100 MHz,  $\text{CDCl}_3$ , 24 °C):  $\delta$  194.8, 135.6, 134.4, 131.8, 130.5, 128.9, 128.4, 127.9, 126.4,

124.1, 122.1, 120.7, 111.8, 40.0, 31.3, 24.5, 22.3, 13.9.; HRMS (ESI/Q-TOF)  $m/z$ :  $[\text{M} + \text{H}]^+$  Calcd for  $\text{C}_{20}\text{H}_{21}\text{NO} + \text{H}$ : 292.1701 found 292.1710.



## 6. Optimization: Synthesis of 3-Acylindole 6a

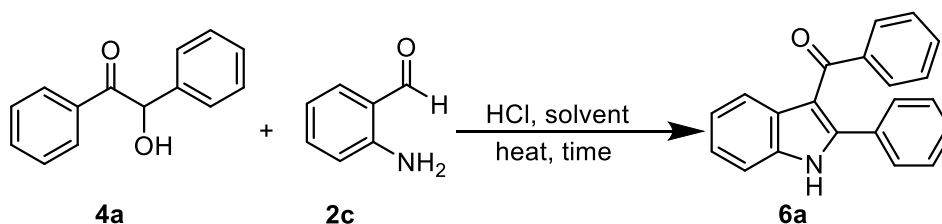

| Entry | Acid (equiv)                         | Temp (°C) | Solvent            | Yield (%) |
|-------|--------------------------------------|-----------|--------------------|-----------|
| 1     | PTSA (0.5)                           | 100       | Dioxane            | 36        |
| 2     | MSA (0.5)                            | 100       | Dioxane            | 22        |
| 3     | TFA (0.5)                            | 100       | Dioxane            | 29        |
| 4     | H <sub>2</sub> SO <sub>4</sub> (0.5) | 100       | CH <sub>3</sub> CN | 15        |
| 5     | Conc.HCl (2)                         | 100       | CH <sub>3</sub> CN | 40        |
| 6     | Conc.HCl (2)                         | 80        | THF                | 44        |
| 7     | 1N HCl (2)                           | 100       | Dioxane            | 32        |
| 8     | 1N HCl (2)                           | 100       | EtOH               | 20        |
| 9     | Conc.HCl (2)                         | 100       | Dioxane            | 55        |
| 10    | Conc.HCl (2)                         | 120       | Dioxane            | 65        |
| 11    | Conc.HCl (2)                         | 100       | EtOH               | 20        |

Reaction conditions: **4a** (0.23 mmol, 1 equiv), **2c** (0.23 mmol, 1 equiv), Conc. HCl (11.5 M, 0.5 mmol, 2 equiv), Dioxane (3 mL for 0.23 mmol), 120 °C, 24 h.

### General procedure for synthesis of 3-acyl indoles 6:

In a 20 mL reaction tube, benzoin **4a** (0.23 mmol, 1 equiv) and 2-aminobenzaldehyde **2c** (28 mg, 0.23 mmol, 1 equiv) was taken in 3 mL of dioxane. Conc. HCl (11.5 M, 20 mg, 0.5 mmol, 2 equiv) was added to the reaction mixture and the tube was sealed and kept in a pre-heated oil bath at 120 °C and was then stirred for 24 h. After the completion of reaction, as indicated by TLC, it was cooled down to room temperature and extracted with DCM. The organic layer was then dried over Na<sub>2</sub>SO<sub>4</sub> and evaporated under reduced pressure. The crude product was then further purified by silica gel chromatography using ethyl acetate:hexane as an eluent to afford 3-acylindole **6** in good yield.

### 2-((2-Acetylphenyl)amino)-1,2-diphenylethan-1-one (5):

Yield: 87% (168 mg); Solid; m.p. 105-110 °C;  $R_f=0.6$  in 15% EtOAc; IR ( $\nu_{\max}$ ,  $\text{cm}^{-1}$ ): 3456,

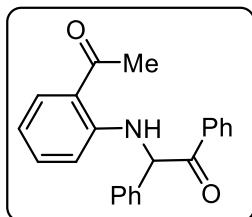

3288, 1683, 1639, 1570, 1510, 1452, 1246, 1169, 964, 753, 698.  $^1\text{H}$  NMR (400 MHz,  $\text{CDCl}_3$ , 24 °C):  $\delta$  10.21 (d,  $J = 6.0$  Hz, 1H), 8.01 (d,  $J = 7.5$  Hz, 2H), 7.75 (d,  $J = 7.7$  Hz, 1H), 7.49 - 7.47 (m, 3H), 7.40 (t,  $J = 7.5$  Hz, 2H), 7.28-7.19 (m, 4H), 6.63-6.57 (m, 2H), 6.10 (d,  $J = 6.2$  Hz,

1 H), 2.58 (s, 3H).  $^{13}\text{C}\{^1\text{H}\}$  NMR (100 MHz,  $\text{CDCl}_3$ , 24 °C):  $\delta$  200.7, 195.7, 148.8, 137.1, 135.0, 134.8, 133.4, 132.8, 129.1, 128.9, 128.6, 128.2, 128.1, 118.6, 115.0, 112.5, 62.4, 28.0.; HRMS (ESI/Q-TOF)  $m/z$ :  $[\text{M} + \text{H}]^+$  Calcd for  $\text{C}_{22}\text{H}_{19}\text{NO}_2$ : 330.1494 found 330.1507.

### 4-bromo-2-((2-oxo-1,2-diphenylethyl)amino)benzaldehyde (5')

Yield: 39% (36 mg); Yellow solid; m.p. 160-165 °C;  $R_f = 0.6$  in 15% EtOAc; IR ( $\nu_{\max}$ ,  $\text{cm}^{-1}$ ):

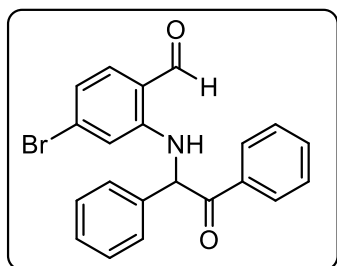

1671, 1592, 1208, 870, 754.  $^1\text{H}$  NMR (400 MHz,  $\text{CDCl}_3$ , 24 °C):  $\delta$  9.85-9.80 (m, 2H), 8.02 (d,  $J = 8.2$  Hz, 2H), 7.53 (t,  $J = 7.5$  Hz, 1H), 7.48-7.41 (m, 4H), 7.33-7.29 (m, 3H), 7.25-7.21 (m, 1H), 6.83-6.81 (m, 2H), 6.06 (d, 6.2 Hz, 1H).  $^{13}\text{C}\{^1\text{H}\}$  NMR (100 MHz,  $\text{CDCl}_3$ , 24 °C):  $\delta$  194.7, 193.0, 148.8, 137.9, 136.2, 134.4,

133.7, 131.1, 129.3, 128.9, 128.7, 128.5, 128.1, 119.1, 118.3, 114.6, 61.9.; HRMS (ESI/Q-TOF)  $m/z$ :  $[\text{M} + \text{H}]^+$  Calcd for  $\text{C}_{21}\text{H}_{16}\text{BrNO}_2 + \text{H}$ : 394.0443 found 394.0452.

### Benzil:

Yield: 20% (20 mg); Liquid;  $R_f = 0.8$  in 15% EtOAc; IR ( $\nu_{\max}$ ,  $\text{cm}^{-1}$ ): 3063, 2924, 1672, 1589,

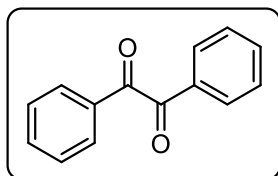

1210, 874, 715.;  $^1\text{H}$  NMR (400 MHz,  $\text{CDCl}_3$ , 24 °C):  $\delta$  7.97 (d,  $J = 7.9$  Hz, 2H), 7.65 (t,  $J = 7.5$  Hz, 1H), 7.5 (t,  $J = 7.7$  Hz, 2H).  $^{13}\text{C}\{^1\text{H}\}$  NMR (100 MHz,  $\text{CDCl}_3$ , 24 °C):  $\delta$  194.6, 134.9, 133.0, 129.9, 129.0.; HRMS (ESI/Q-TOF)  $m/z$ :  $[\text{M} + \text{H}]^+$  Calcd for  $\text{C}_{14}\text{H}_{10}\text{O}_2 + \text{H}$ : 211.0759

found 211.0758.

### 6.1. Properties of synthesized 3-acyl indoles:

#### Phenyl(2-phenyl-1H-indol-3-yl)methanone (6a):

Yield: 65% (45 mg); Solid; m.p. 190-192 °C;  $R_f$ = 0.5 in 20% EtOAc; IR ( $\nu_{\max}$ ,  $\text{cm}^{-1}$ ): 3289,

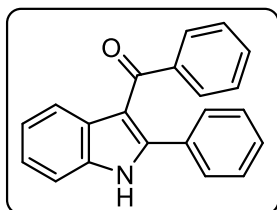

2992, 1765, 1245, 1067, 978, 752, 696.  $^1\text{H}$  NMR (400 MHz,  $\text{CDCl}_3$ , 24 °C):  $\delta$  8.68 (s, 1H), 7.94 (d,  $J$  = 7.8 Hz, 1H), 7.64 (d,  $J$  = 7.5 Hz, 2H), 7.45-7.15 (m, 11H)  $^{13}\text{C}\{^1\text{H}\}$  NMR (100 MHz,  $\text{CDCl}_3$ , 24 °C):  $\delta$  193.3, 143.7, 139.7, 135.5, 131.8, 131.6, 129.7, 129.3, 128.9, 128.7,

128.5, 127.8, 123.7, 122.3, 121.8, 113.9, 111.1.; HRMS (ESI/Q-TOF)  $m/z$ :  $[\text{M} + \text{H}]^+$  Calcd for  $\text{C}_{21}\text{H}_{15}\text{NO} + \text{H}$ : 298.1232 found 298.1251.

#### (5-Methoxy-2-phenyl-1H-indol-3-yl)(phenyl)methanone (6b):

Yield: 51% (39 mg); Solid; m.p. 160-165 °C;  $R_f$ =0.4 in 20 % EtOAc; IR ( $\nu_{\max}$ ,  $\text{cm}^{-1}$ ): 3435,

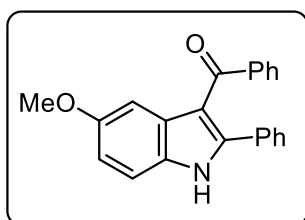

1624, 1457, 1421, 1269, 1211, 696.  $^1\text{H}$  NMR (400 MHz,  $\text{CDCl}_3$ , 24 °C):  $\delta$  8.57 (s, 1H), 7.59 (d,  $J$  = 7.8 Hz, 2H), 7.55 (s, 1H), 7.34-7.25 (m, 4H), 7.18-7.11 (m, 5H), 6.94 (d,  $J$  = 9.1 Hz, 1H), 3.83 (s, 3H).  $^{13}\text{C}\{^1\text{H}\}$  NMR (100 MHz,  $\text{CDCl}_3$ , 24 °C):  $\delta$  193.3, 156.0, 144.3,

139.7, 131.8, 131.3, 130.4, 129.6, 129.5, 129.2, 128.6, 128.3, 127.6, 114.3, 113.6, 111.8, 102.9, 55.7.; HRMS (ESI/Q-TOF)  $m/z$ :  $[\text{M} + \text{H}]^+$  Calcd for  $\text{C}_{22}\text{H}_{17}\text{NO}_2 + \text{H}$ : 328.1338 found 328.1337.

#### (5-Chloro-2-phenyl-1H-indol-3-yl)(phenyl)methanone (6c):

Yield: 42% (32 mg); Solid; m.p. 250-255 °C;  $R_f$ =0.6 in 20 % EtOAc; IR ( $\nu_{\max}$ ,  $\text{cm}^{-1}$ ): 3338,

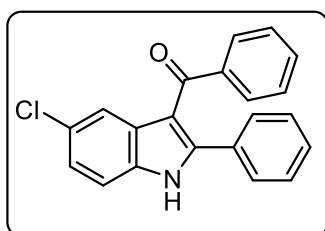

2946, 2832, 1662, 1452, 1024, 651.  $^1\text{H}$  NMR (400 MHz,  $\text{DMSO-d}_6$ , 24 °C):  $\delta$  12.42 (s, 1H), 7.78 (s, 1H), 7.54-7.48 (m, 3H), 7.37-7.33 (m, 3H), 7.28-7.17 (m, 6H).  $^{13}\text{C}\{^1\text{H}\}$  NMR (100 MHz,  $\text{DMSO-d}_6$ , 24 °C):  $\delta$  192.3, 146.1, 139.9, 134.8, 131.9, 131.5, 130.0, 129.7, 129.4, 129.2, 128.5, 128.2, 126.5, 123.4, 120.1,

113.9, 112.1.; HRMS (ESI/Q-TOF)  $m/z$ :  $[\text{M} + \text{H}]^+$  Calcd for  $\text{C}_{21}\text{H}_{14}\text{ClNO} + \text{H}$ : 332.0842 found 332.0853.

**(5-Bromo-2-phenyl-1H-indol-3-yl)(phenyl)methanone (6d):**

Yield: 35% (31 mg); Solid; m.p. 255-260 °C;  $R_f=0.5$  in 20 % EtOAc; IR ( $\nu_{\max}$ ,  $\text{cm}^{-1}$ ): 3358,

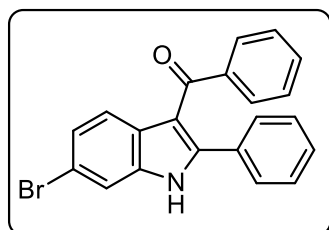

2944, 2832, 1661, 1451, 1113, 1025, 646.  $^1\text{H}$  NMR (400 MHz,  $\text{DMSO-d}_6$ , 24 °C):  $\delta$  12.37 (s, 1H), 7.69-7.67 (m, 2H), 7.51 (d,  $J = 7.7$  Hz, 2H), 7.38-7.35 (m, 3H), 7.32-7.18 (m, 6H).  $^{13}\text{C}\{^1\text{H}\}$  NMR (100 MHz,  $\text{DMSO-d}_6$ , 24 °C):  $\delta$  192.4, 145.2, 139.8, 137.1, 132.0, 131.5, 129.9, 129.5, 129.2, 128.5, 128.3, 127.6, 124.8,

122.7, 115.7, 114.8, 112.5.; HRMS (ESI/Q-TOF)  $m/z$ :  $[\text{M} + \text{H}]^+$  Calcd for  $\text{C}_{21}\text{H}_{14}\text{BrNO} + \text{H}$ : 376.0337 found 376.0346.

**Methyl 3-benzoyl-2-phenyl-1H-indole-6-carboxylate (6e):**

Yield: 48% (40 mg); Solid; m.p. 165-170 °C;  $R_f=0.6$  in 20 % EtOAc; IR ( $\nu_{\max}$ ,  $\text{cm}^{-1}$ ): 3430,

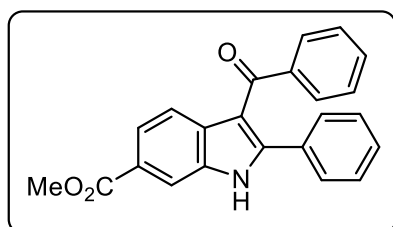

2075, 1633, 1016, 766, 502.  $^1\text{H}$  NMR (400 MHz,  $\text{DMSO-d}_6$ , 24 °C):  $\delta$  12.57 (s, 1H), 8.14 (s, 1H), 7.84-7.76 (m, 2H), 7.53 (d,  $J = 7.6$  Hz, 2H), 7.42-7.36 (m, 3H), 7.28-7.19 (m, 5H).  $^{13}\text{C}\{^1\text{H}\}$  NMR (100 MHz,  $\text{DMSO-d}_6$ , 24 °C):  $\delta$  192.4, 167.2, 147.3, 139.7, 135.6, 132.2, 132.1, 131.4, 130.0,

129.5, 129.4, 128.6, 128.3, 124.2, 122.4, 120.8, 114.0, 112.8, 52.4.; HRMS (ESI/Q-TOF)  $m/z$ :  $[\text{M} + \text{H}]^+$  Calcd for  $\text{C}_{23}\text{H}_{17}\text{NO}_3 + \text{H}$ : 356.1287 found 356.1288.

**(6-Nitro-2-phenyl-1H-indol-3-yl)(phenyl)methanone (6f):**

Yield: 46% (37 mg); Solid; m.p. 245-250 °C;  $R_f=0.4$  in 20 % EtOAc; IR ( $\nu_{\max}$ ,  $\text{cm}^{-1}$ ): 3446,

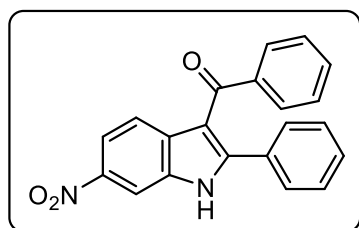

1631, 1510, 1334, 725, 693.  $^1\text{H}$  NMR (400 MHz,  $\text{DMSO-d}_6$ , 24 °C):  $\delta$  8.37 (s, 1H), 8.05 (d,  $J = 9.0$  Hz, 1H), 7.87 (d,  $J = 8.9$  Hz, 1H), 7.55 (d,  $J = 7.9$  Hz, 2H), 7.44-7.38 (m, 3H), 7.33-7.21 (m, 5H).  $^{13}\text{C}\{^1\text{H}\}$  NMR (100 MHz,  $\text{DMSO-d}_6$ , 24 °C):  $\delta$  192.2,

149.2, 143.3, 139.3, 134.9, 133.4, 132.4, 130.9, 130.0, 129.8, 129.6, 128.7, 128.4, 121.2, 116.9, 113.1, 108.7.; HRMS (ESI/Q-TOF)  $m/z$ :  $[\text{M} + \text{H}]^+$  Calcd for  $\text{C}_{21}\text{H}_{14}\text{N}_2\text{O}_3 + \text{H}$ : 343.1083 found 343.1096.

### **p-Tolyl(2-(p-tolyl)-1H-indol-3-yl)methanone (6g)**

Yield: 56% (42 mg); Solid; m.p. 185-187 °C;  $R_f=0.5$  in 20% EtOAc; IR ( $\nu_{\max}$ ,  $\text{cm}^{-1}$ ): 3342,

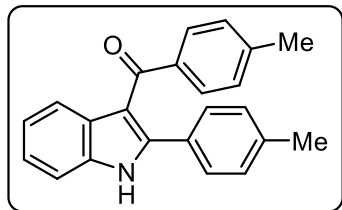

2989, 1763, 1376, 1241, 1053.  $^1\text{H}$  NMR (500 MHz,  $\text{CDCl}_3$ , 24 °C):  $\delta$  8.78 (s, 1H), 7.72 (d,  $J = 8.3$  Hz, 1H), 7.55 (d,  $J = 8.0$  Hz, 2H), 7.33 (d,  $J = 8.0$  Hz, 1H), 7.21-7.17 (m, 3H), 7.12 (t,  $J = 7.2$  Hz, 1H), 6.98- 6.93 (m, 4H), 2.26 (s, 3H), 2.22 (s, 3H).  $^{13}\text{C}\{^1\text{H}\}$

NMR (125 MHz,  $\text{CDCl}_3$ , 24 °C):  $\delta$  193.2, 143.4, 142.3, 138.8, 137.2, 135.5, 130.0, 129.2, 129.1, 129.0, 128.8, 128.6, 123.3, 121.9, 121.6, 113.7, 111.1, 21.6, 21.3.; HRMS (ESI/Q-TOF) m/z:  $[\text{M} + \text{H}]^+$  Calcd for  $\text{C}_{23}\text{H}_{19}\text{NO} + \text{H}$ : 326.1545 found 326.1558.

### **(3-bromophenyl)(2-(3-bromophenyl)-1H-indol-3-yl)methanone (6h):**

Yield: 70% (73 mg); Solid; m.p. 190-195 °C;  $R_f=0.6$  in 20 % EtOAc; IR ( $\nu_{\max}$ ,  $\text{cm}^{-1}$ ): 3363,

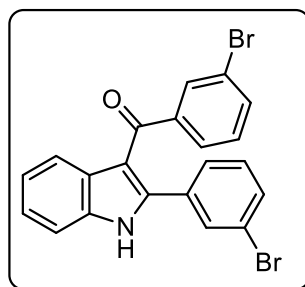

2945, 2832, 1661, 1448, 1029, 702.  $^1\text{H}$  NMR (400 MHz,  $\text{DMSO-d}_6$ , 24 °C):  $\delta$  12.41 (s, 1H), 7.92 (d,  $J = 7.7$  Hz, 1H), 7.55-7.52 (m, 4H), 7.46 (d,  $J = 7.4$  Hz, 2H), 7.35-7.27 (m, 2H), 7.24-7.15 (m, 3H).  $^{13}\text{C}\{^1\text{H}\}$  NMR (100 MHz,  $\text{DMSO-d}_6$ , 24 °C):  $\delta$  190.6, 143.8, 142.3, 136.3, 134.1, 134.0, 132.6, 132.0, 131.8, 130.4, 129.2, 128.2, 128.1, 123.9, 122.4, 121.7, 121.6, 121.3, 112.7, 112.5.; HRMS (ESI/Q-

TOF) m/z:  $[\text{M} + \text{H}]^+$  Calcd for  $\text{C}_{21}\text{H}_{13}\text{Br}_2\text{NO} + \text{H}$ : 453.9442 found 453.9450.

### **1-(2-Methyl-1H-indol-3-yl)ethan-1-one (6i)**

Yield: 50% (20 mg); Solid; m.p. 185- 187 °C;  $R_f=0.5$  in 20% EtOAc; IR ( $\nu_{\max}$ ,  $\text{cm}^{-1}$ ): 3630,

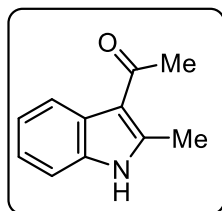

2988, 1764, 1712, 1374, 1237, 1044.  $^1\text{H}$  NMR (500 MHz,  $\text{CDCl}_3$ , 24 °C):  $\delta$  8.50 (s, 1H), 8.01 (d,  $J = 8.0$  Hz, 1H), 7.33 (d,  $J = 7.8$  Hz, 1H), 7.26-7.19 (m, 2H), 2.76 (s, 3H), 2.66 (s, 3H).  $^{13}\text{C}\{^1\text{H}\}$  NMR (125 MHz,  $\text{CDCl}_3$ , 24 °C):  $\delta$  194.7, 143.6, 134.6, 127.1, 122.5, 122.2, 121.0, 114.9, 110.9, 31.3,

15.5.; HRMS (ESI/Q-TOF) m/z:  $[\text{M} + \text{H}]^+$  Calcd for  $\text{C}_{11}\text{H}_{11}\text{NO} + \text{H}$ : 174.0919 found 174.0923.

### **1-(2-Phenyl-1H-indol-3-yl)ethan-1-one (6j)**

Yield: 62% (35 mg); Solid; m.p. 210-202 °C;  $R_f=0.5$  in 20% EtOAc; IR ( $\nu_{\max}$ ,  $\text{cm}^{-1}$ ): 2989,

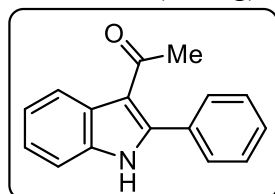

1762, 1375, 1240, 1050.  $^1\text{H}$  NMR (500 MHz,  $\text{CDCl}_3$ , 24 °C):  $\delta$  8.67 (s, 1H), 8.48-8.46 (m, 1H), 7.67- 7.65 (m, 2H), 7.61- 7.59 (m, 3H), 7.49-7.47 (m, 1H), 7.42- 7.37 (m, 2H), 2.28 (s, 3H).  $^{13}\text{C}\{^1\text{H}\}$  NMR

(125 MHz, CDCl<sub>3</sub>, 24 °C):  $\delta$  195.4, 144.3, 135.2, 132.9, 129.9, 129.8, 128.8, 127.5, 123.8, 122.8, 122.7, 115.9, 110.8, 30.4.; HRMS (ESI/Q-TOF)  $m/z$ : [M + H]<sup>+</sup> Calcd for C<sub>16</sub>H<sub>13</sub>NO+H: 236.1075 found 236.1085.

### (2-Methyl-1H-indol-3-yl)(phenyl)methanone (6j')

Yield: 25% (14 mg); Solid; m.p. 175 -178 °C;  $R_f$ =0.3 in 20% EtOAc; IR ( $\nu_{\max}$ , cm<sup>-1</sup>): 2990,

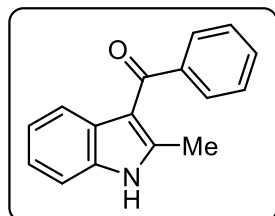

1763, 1377, 1242, 1058. <sup>1</sup>H NMR (400 MHz, CDCl<sub>3</sub>, 24 °C):  $\delta$  9.04 (s, 1H), 7.75 (d,  $J$  = 7.1 Hz, 2H), 7.54 (t,  $J$  = 7.4 Hz, 1H), 7.47-7.39 (m, 3H), 7.29 (d,  $J$  = 7.8 Hz, 1H), 7.14 (t,  $J$  = 8.2 Hz, 1H), 7.06 (t,  $J$  = 7.8 Hz, 1H), 2.50 (s, 3H). <sup>13</sup>C{<sup>1</sup>H} NMR (100 MHz, CDCl<sub>3</sub>, 24 °C):  $\delta$

193.5, 143.9, 141.4, 134.8, 131.6, 128.9, 128.4, 127.7, 122.5, 121.6, 121.0, 114.0, 110.8, 14.6; HRMS (ESI/Q-TOF)  $m/z$ : [M + H]<sup>+</sup> Calcd for C<sub>16</sub>H<sub>13</sub>NO+H: 236.1075 found 236.1166.

## 7. Synthetic application:

### 7.1. Gram scale synthesis

In an oven dried reaction tube compound, **1a** (0.92 g, 5.07 mmol, 1 equiv) and 2-amino benzophenone (1 g, 5.07 mmol, 1 equiv) was taken in 10 mL of dioxane. 5 mL of 1 N HCl was added to the reaction mixture and the reaction mixture was sealed and kept in a pre-heated oil bath at 100 °C and stirred for 18 h at the same temperature. After completion of reaction, as indicated by TLC, it was cooled down to room temperature and the reaction mixture was extracted with DCM. The solvent was dried over Na<sub>2</sub>SO<sub>4</sub> and evaporated under reduced pressure. The crude was further purified by column chromatography to afford the product **3f** in 94% yield (1.54 g).

### 7.5. Synthesis of 1-Phenyl-3H-pyrrolo[1,2-a]indole-2-carbaldehyde (**7**)<sup>9</sup>

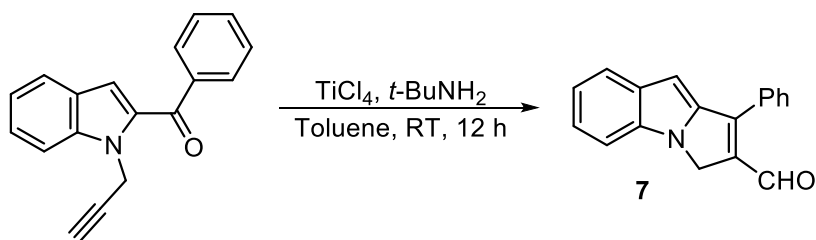

In an oven dried Schlenk tube, a solution of *N*-alkylated product (95 mg, 0.37 mmol, 1 equiv) was taken in 3 mL of dry toluene under nitrogen atmosphere and *t*-BuNH<sub>2</sub> (1.4 mL, 3.30 mmol,

9 equiv) was added. When the starting materials were completely dissolved,  $\text{TiCl}_4$  (0.1 mL, 0.55 mmol, 1.5 equiv) was dissolved in 2 mL of dry toluene and was added dropwise to the reaction mixture. The reaction mixture was stirred at room temperature until starting material was completely consumed, as indicated by TLC. The reaction mixture was then quenched with saturated solution of  $\text{NaHCO}_3$  and extracted with EtOAc. The organic layer was then dried over  $\text{Na}_2\text{SO}_4$  and the solvent was evaporated at reduced pressure. The crude product was then purified by column chromatography using ethyl acetate:hexane as an eluent to afford the product **10** in 66 % (62 mg) yield as yellow solid. m.p. 150-152 °C  $R_f=0.5$  in 20% EtOAc; IR ( $\nu_{\text{max}}$ ,  $\text{cm}^{-1}$ ): 2989, 1762, 1375, 1239, 1048.  $^1\text{H}$  NMR (400 MHz,  $\text{CDCl}_3$ , 24 °C):  $\delta$  9.95 (s, 1H), 7.73 (s, 2H), 7.67 (d,  $J = 7.97$ , 1H), 7.57 (s, 3H), 7.40 (d,  $J = 7.97$ , 1H), 7.30- 7.25 (m, 1H), 7.13 (t,  $J = 7.5$  Hz, 1H), 6.73 (s, 1H), 4.97 (s, 2H).  $^{13}\text{C}$   $\{^1\text{H}\}$  NMR (100 MHz,  $\text{CDCl}_3$ , 24 °C):  $\delta$  187.1, 150.1, 145.5, 137.3, 134.9, 132.4, 130.6, 129.5, 129.2, 123.9, 122.7, 120.4, 109.9, 98.6, 48.5.; HRMS (ESI/Q-TOF) m/z:  $[\text{M} + \text{H}]^+$  Calcd for  $\text{C}_{18}\text{H}_{13}\text{NO} + \text{H}$ : 260.1075 found 260.1066.

## 7.6. Synthesis of anti-tumor agent: 10

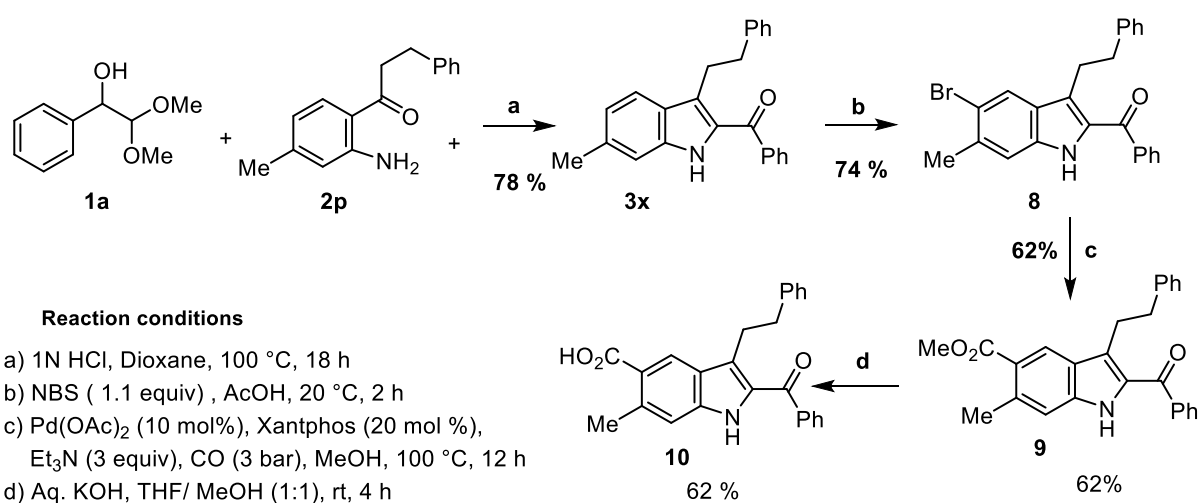

**Step-b:** **3x** was synthesized employing the general procedure mentioned earlier. **3x** (50 mg, 0.15 mmol, 1 equiv) was taken in 3 mL of glacial acetic acid and the reaction mixture was kept at 20 °C. N-Bromosuccinimide (29 mg, 0.16 mmol, 1.1 equiv) was added portion wise and the reaction mixture was stirred for 2 h. After the completion of reaction, as indicated by TLC, the reaction mixture was extracted with DCM and the organic layer was dried with  $\text{Na}_2\text{SO}_4$  and was evaporated under reduced pressure. The crude was then purified by silica gel chromatography to afford the corresponding brominated product **8** in 74% (45 mg) yield.

**Step-c:** The brominated product **8** (0.21 mmol, 1 equiv) was taken in dry MeOH (3 mL). Pd (OAc)<sub>2</sub> (10 mol %), Xantphos (20 mol%), and 3 equiv of Et<sub>3</sub>N were added and pressurized 3 bar with CO. The reaction was continued for 12 h at 100 °C. After the completion of reaction, as indicated by TLC, the reaction was cooled down to room temperature and extracted with DCM. The organic layer was then dried with Na<sub>2</sub>SO<sub>4</sub> and was evaporated under reduced pressure. The crude reaction mixture was then purified by column chromatography to afford the corresponding ester **9** in 62% yield.

**Step-d:** The ester **9** (75 mg, 0.19 mmol, 1 equiv) was dissolved in 2 mL of THF/MeOH (1:1). 2 mL of saturated aq. KOH was added and stirred at room temperature for 4 h. After the completion of reaction, the reaction mixture was extracted with DCM and the water layer was collected separately. The water layer was then acidified with 1N HCl and extracted with EtOAc. The organic layer was dried over Na<sub>2</sub>SO<sub>4</sub>. Evaporation of solvent followed by purification of crude product using column chromatography gave the desired product **10** as a white solid in 62% (45 mg) yield.

**(6-Methyl-3-phenethyl-1H-indol-2-yl)(phenyl)methanone (3x):**

Yield: 56% (43 mg); Yellow Solid; m.p. 120-125 °C; *R<sub>f</sub>*=0.6 in 15% EtOAc; IR (ν<sub>max</sub>, cm<sup>-1</sup>):

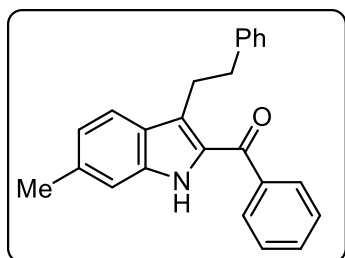

3447, 3055, 1624, 1265, 744. <sup>1</sup>H NMR (400 MHz, CDCl<sub>3</sub>, 24 °C): δ 8.69 (s, 1H), 7.70 (d, *J* = 7.5 Hz, 2H), 7.60 (d, *J* = 7.5 Hz, 2H), 7.50 (t, *J* = 7.5 Hz, 2H), 7.19-7.14 (m, 4 H), 7.00 (d, *J* = 7.9 Hz, 1 H), 6.89 (d, *J* = 7.1 Hz, 2H), 3.30 (t, *J* = 8.8 Hz, 2H), 2.78 (t, *J* = 7.6 Hz, 2H), 2.49 (s, 3H). <sup>13</sup>C {<sup>1</sup>H} NMR (100 MHz,

CDCl<sub>3</sub>, 24 °C): δ 189.1, 141.6, 139.6, 137.1, 136.9, 131.7, 130.9, 128.5, 128.4, 128.3, 128.2, 126.0, 125.9, 124.9, 122.6, 120.9, 111.6, 37.5, 27.6, 22.1; HRMS (ESI/Q-TOF) *m/z*: [M + H]

<sup>+</sup> Calcd for C<sub>24</sub>H<sub>21</sub>NO+H: 340.1701 found 340.1708.



### Methyl 2-benzoyl-6-methyl-3-phenethyl-1H-indole-5-carboxylate (9):

Yield: 62% (25 mg); White Solid; 105-110 °C; m.p.  $R_f$ =0.5 in 15% EtOAc; IR ( $\nu_{\max}$ ,  $\text{cm}^{-1}$ ):

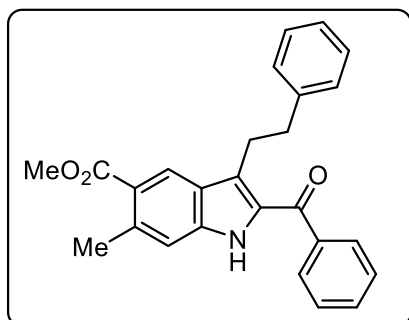

3434, 1716, 1627, 1264, 1062, 741, 702.  $^1\text{H}$  NMR (400 MHz,  $\text{CDCl}_3$ , 24 °C):  $\delta$  9.01 (s, 1H), 8.37 (s, 1H), 7.69 (d,  $J$  = 7.5 Hz, 2H), 7.61 (t,  $J$  = 7.2 Hz, 1H), 7.50 (d,  $J$  = 7.4 Hz, 2H), 7.22 (s, 1H), 7.19-7.12 (m, 3 H), 6.87 (d,  $J$  = 7.1 Hz, 2H), 3.93 (s, 3H), 3.06 (t,  $J$  = 7.2 Hz, 2H), 2.79 (t,  $J$  = 7.4 Hz, 2H), 2.72 (s, 3H).  $^{13}\text{C}\{^1\text{H}\}$  NMR (100 MHz,  $\text{CDCl}_3$ , 24 °C):  $\delta$  189.1, 168.3, 141.2, 139.1, 138.5, 138.3, 132.2, 132.1, 128.6, 128.5, 128.3, 128.2, 126.0, 125.9, 125.7, 125.6, 122.8, 113.9, 51.8, 37.5, 27.3, 22.9.; HRMS (ESI/Q-TOF)  $m/z$ :  $[\text{M} + \text{H}]^+$  Calcd for  $\text{C}_{26}\text{H}_{23}\text{NO}_3 + \text{H}$ : 398.1756 found 398.1763.

### 2-Benzoyl-6-methyl-3-phenethyl-1H-indole-5-carboxylic acid (10):

Yield: 63% (45 mg); White Solid; m.p. 210-215 °C;  $R_f$ =0.2 in 20 % EtOAc; IR ( $\nu_{\max}$ ,  $\text{cm}^{-1}$ ):

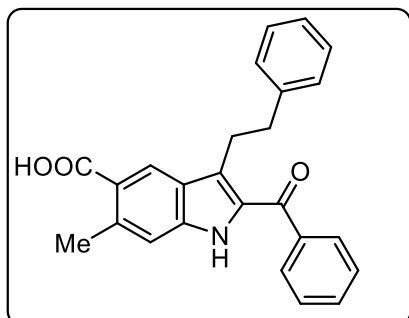

3438, 3212, 1695, 1627, 1571, 1441, 1211, 789, 748, 693.  $^1\text{H}$  NMR (400 MHz,  $\text{DMSO-d}_6$ , 24 °C):  $\delta$  11.6 (s, 1H), 8.33 (s, 1H), 7.70-7.65 (m, 3H), 7.56 (t,  $J$  = 7.2 Hz, 2H), 7.31 (s, 1H), 7.17 (t,  $J$  = 6.8 Hz, 1H), 7.10 (t,  $J$  = 6.6 Hz, 1H), 6.94 (d,  $J$  = 7.2 Hz, 2H), 3.01 (t,  $J$  = 8.0 Hz, 2H), 2.75 (t,  $J$  = 8.0 Hz, 2H), 2.64 (s, 3H).  $^{13}\text{C}\{^1\text{H}\}$  NMR (100 MHz,  $\text{DMSO-d}_6$ , 24 °C):  $\delta$  189.0, 169.5, 141.6, 139.5, 139.0, 132.7, 132.6, 129.0, 128.6, 128.5, 126.3, 125.4, 124.5, 114.7, 37.4, 27.2, 23.0.; HRMS (ESI/Q-TOF)  $m/z$ :  $[\text{M} + \text{H}]^+$  Calcd for  $\text{C}_{25}\text{H}_{21}\text{NO}_3 + \text{H}$ : 384.1600 found 384.1607.

## 8. References

- 1 X. Li, H. Li, W. Song, P.-S. Tseng, L. Liu, I. A. Guzei and W. Tang, *Angew. Chem.*, 2015, **127**, 13097–13100.
- 2 K. Matsuo and M. Shindo, *Org Lett.*, 2010, **12**, 5346–5349.
- 3 M. J. Zacuto and D. Cai, *Tetrahedron Lett.*, 2005, **46**, 447–450.
- 4 F. Ayala-Mata, C. Barrera-Mendoza, H. A. Jiménez-Vázquez, E. Vargas-Díaz and L. G. Zepeda, *Molecules*, 2012, **17**, 13864–13878.
- 5 A. R. Choudhury, M. S. Manna and S. Mukherjee, *Chem. Sci.*, 2017, **8**, 6686–6690.
- 6 B. Qin, X. Liu, J. Shi, K. Zheng, H. Zhao and X. Feng, *J. Org. Chem.*, 2007, **72**, 2374–2378.
- 7 A. Banerjee, A. Guin, S. Saha, A. Mondal and M. S. Maji, *Org. Biomol. Chem.*, 2019, **17**, 1822–1826.
- 8 D. H. Dethe and R. Boda, *Chem. Eur. J.*, 2016, **22**, 106–110.
- 9 G. Abbiati, A. Casoni, V. Canevari, D. Nava and E. Rossi, *Org. Lett.*, 2006, **8**, 4839–4842.

## 9. Spectral data

### 2,2-dimethoxy-1-phenylethan-1-ol:1a

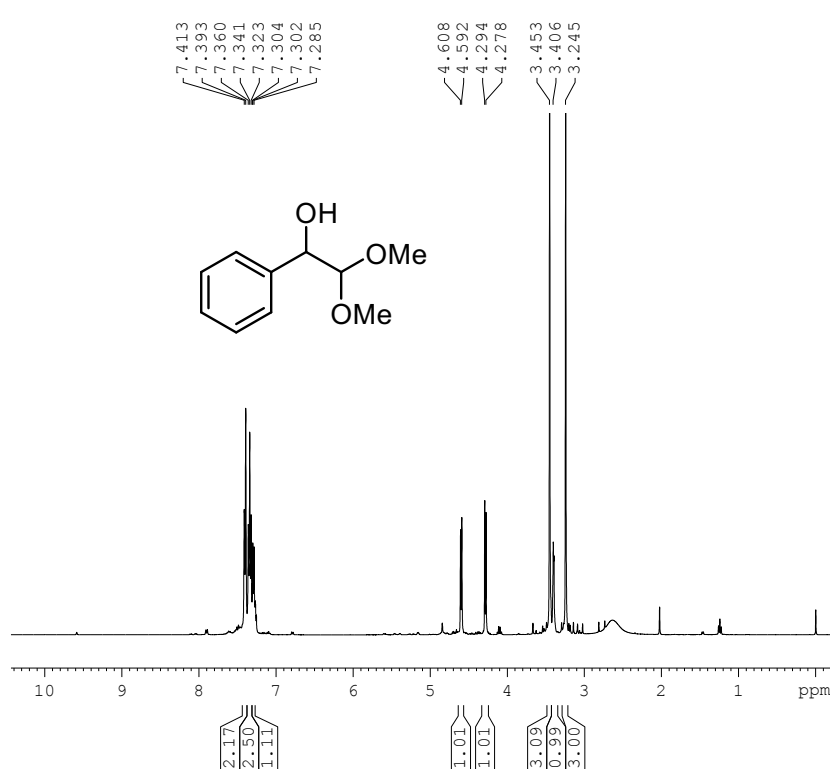

```

Current Data Parameters
NAME          basic nmr
EXPNO        213
PROCNO       1

F2 - Acquisition Parameters
Date_        20230316
Time         2.19 h
INSTRUM     spect
PROBHD      Z129392_0001 (
PULPROG     zg30
TD          65536
SOLVENT     CDCl3
NS          16
DS          2
SWH         8012.820 Hz
FIDRES      0.244532 Hz
AQ          4.0894465 sec
RG          60.89
DW          62.400 usec
DE          6.50 usec
TE          294.5 K
D1          0.50000000 sec
TD0         1
SFO1        400.1320007 MHz
NUC1        1H
P1          15.00 usec
PLW1        10.50000000 W

F2 - Processing parameters
SI          65536
SF          400.1300113 MHz
WDW         EM
SSB         0
LB          0.30 Hz
GB          0
PC          1.00
  
```

$^1\text{H}$  NMR (400 MHz,  $\text{CDCl}_3$ , 24 °C) of the compound **1a**

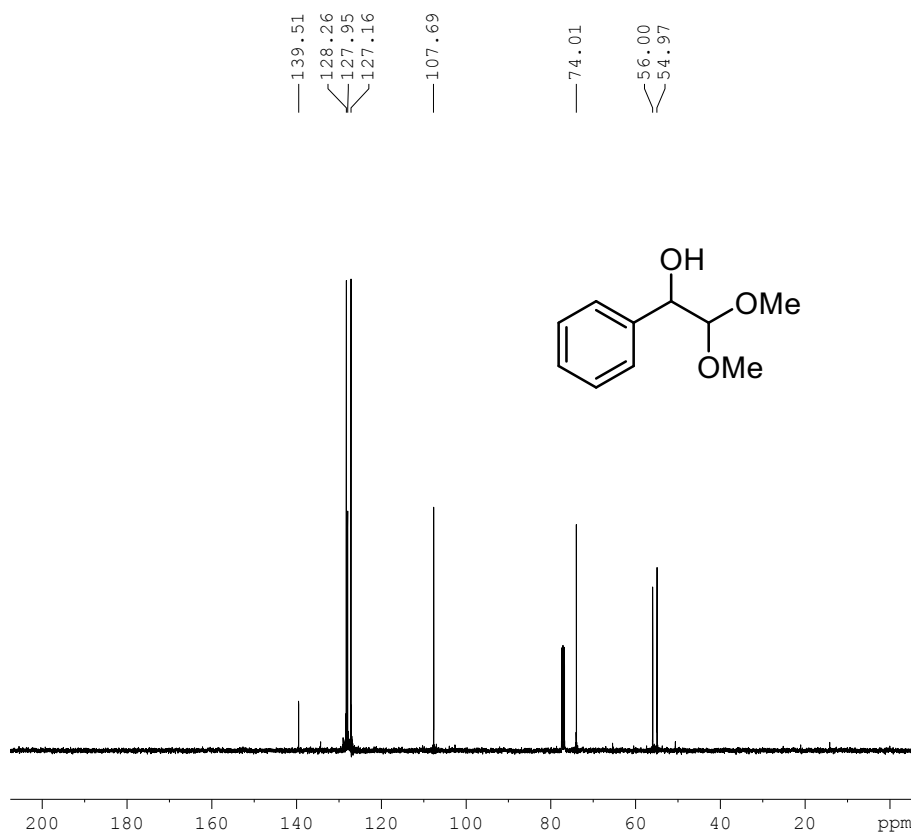

```

Current Data Parameters
NAME          basic nmr
EXPNO        214
PROCNO       1

F2 - Acquisition Parameters
Date_        20230316
Time         2.25 h
INSTRUM     spect
PROBHD      Z129392_0001 (
PULPROG     zgpg30
TD          16540
SOLVENT     CDCl3
NS          256
DS          4
SWH         24038.461 Hz
FIDRES      2.906706 Hz
AQ          0.3440320 sec
RG          200.34
DW          20.800 usec
DE          6.50 usec
TE          295.1 K
D1          1.00000000 sec
D11         0.03000000 sec
TD0         1
SFO1        100.6228289 MHz
NUC1        13C
P1          10.00 usec
PLW1        47.00000000 W
SFO2        400.1316005 MHz
NUC2        1H
CPDPRG[2]   waltz16
PCPD2       90.00 usec
PLW2        10.50000000 W
PLW12       0.29166999 W
PLW13       0.14670999 W

F2 - Processing parameters
SI          32768
  
```

$^{13}\text{C}\{^1\text{H}\}$  NMR (100 MHz,  $\text{CDCl}_3$ , 24 °C) of the compound **1a**

**2,2-dimethoxy-1-(4-methoxyphenyl)ethan-1-ol: 1b**

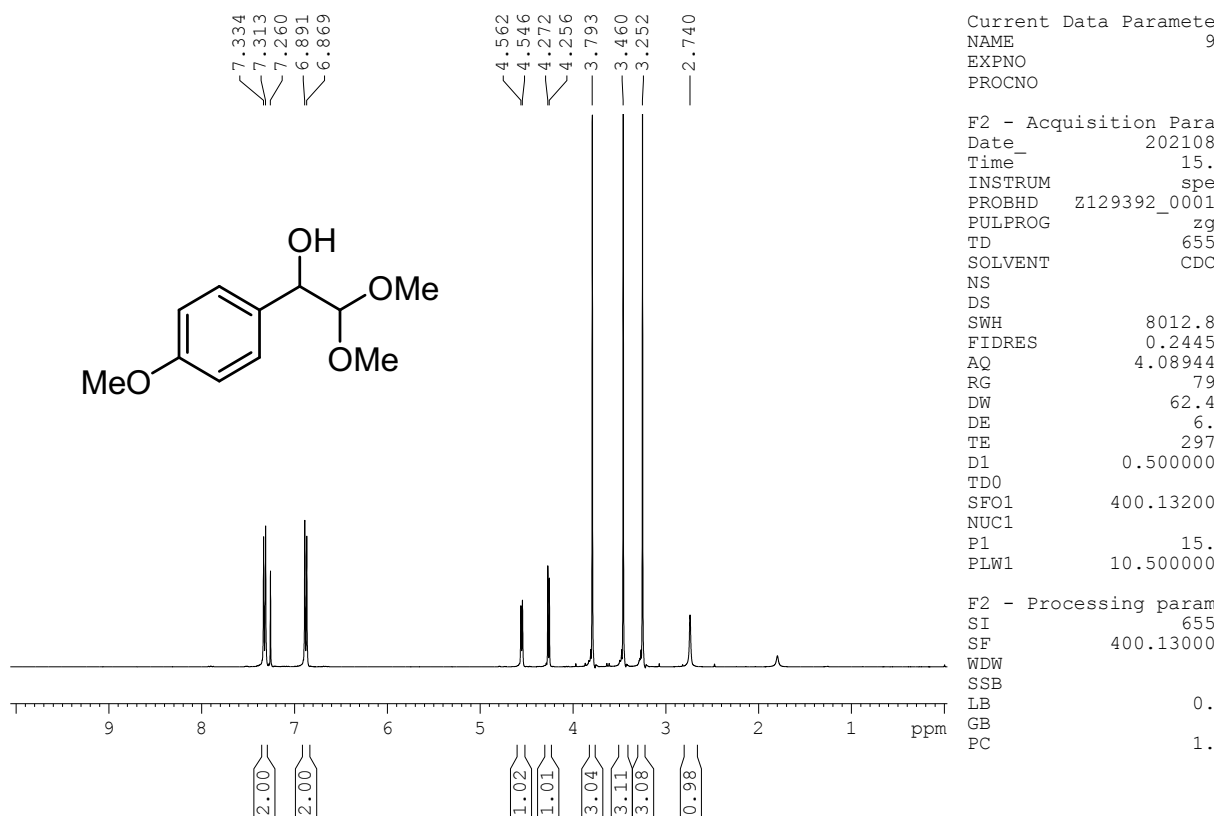

**<sup>1</sup>H NMR (400 MHz, CDCl<sub>3</sub>, 24 °C) of the compound 1b**

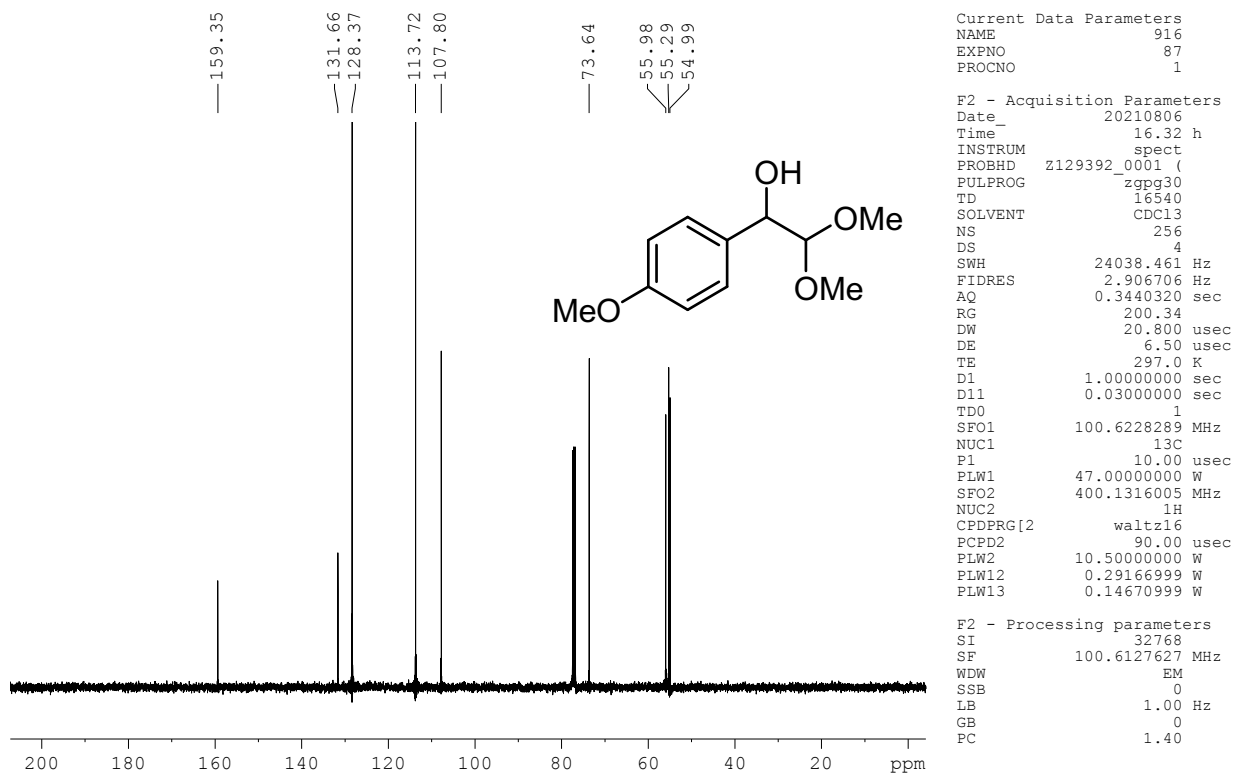

**<sup>13</sup>C{<sup>1</sup>H} NMR (100 MHz, CDCl<sub>3</sub>, 24 °C) of the compound 1b**

**2,2-dimethoxy-1-(4-nitrophenyl)ethan-1-ol: 1c**

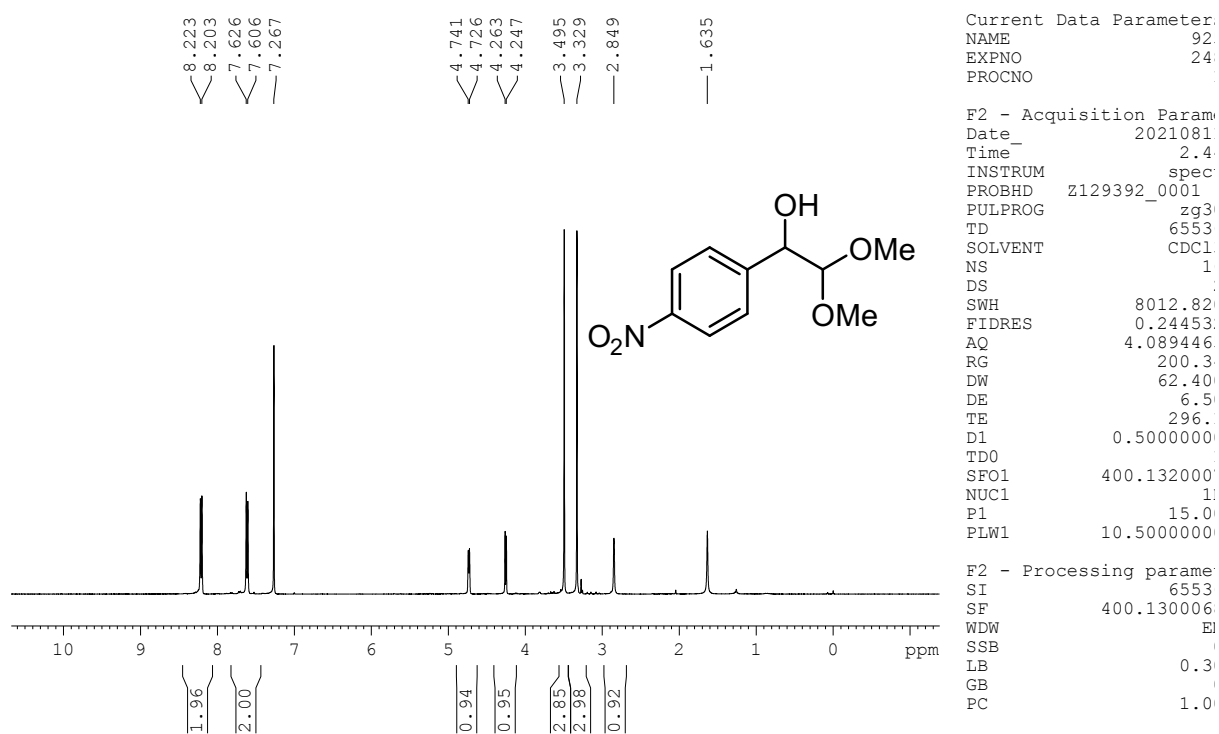

<sup>1</sup>H NMR (400 MHz, CDCl<sub>3</sub>, 24 °C) of the compound **1c**

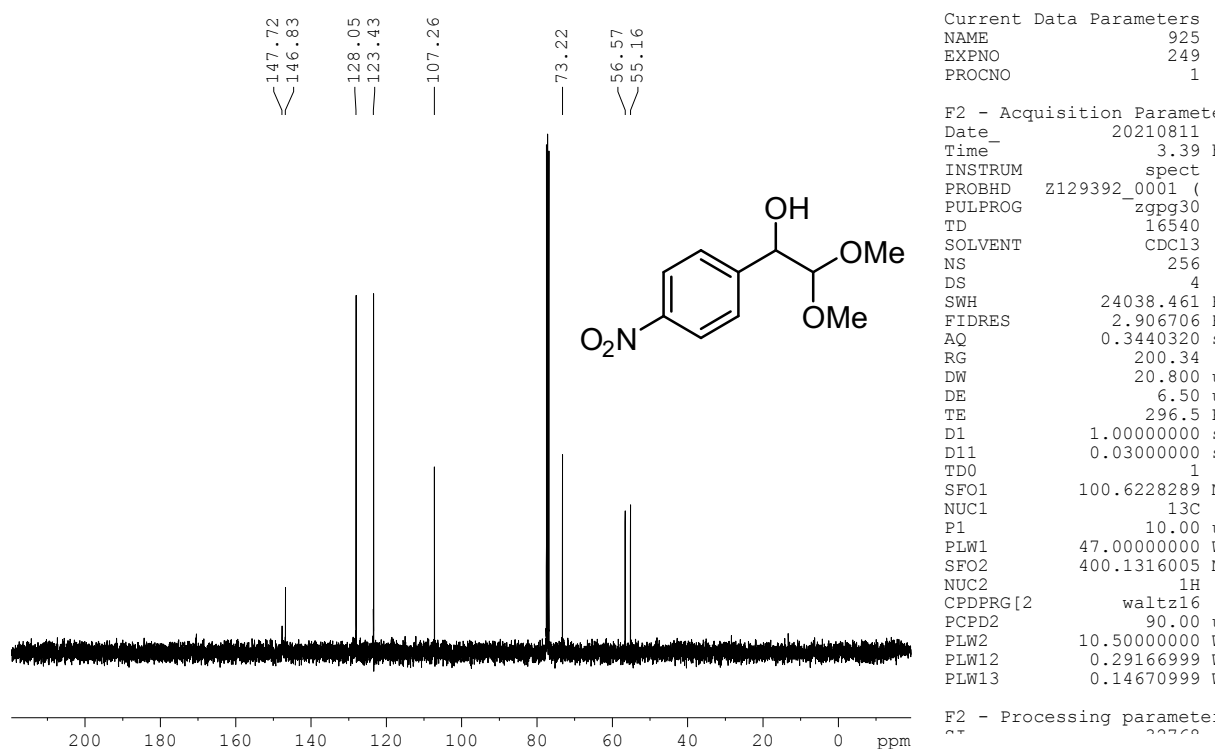

<sup>13</sup>C{<sup>1</sup>H} NMR (100 MHz, CDCl<sub>3</sub>, 24 °C) of the compound **1c**

## 2,2-dimethoxy-1-(2-methoxyphenyl)ethan-1-ol: 1d

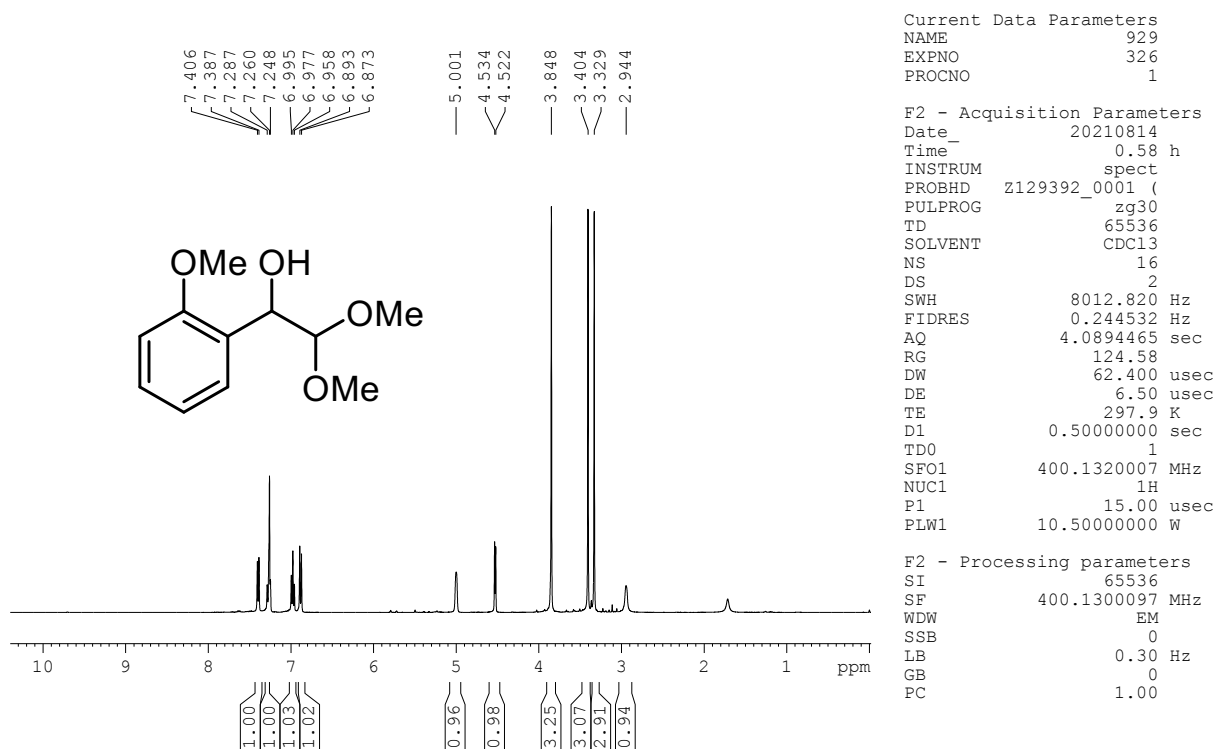

<sup>1</sup>H NMR (400 MHz, CDCl<sub>3</sub>, 24 °C) of the compound 1d

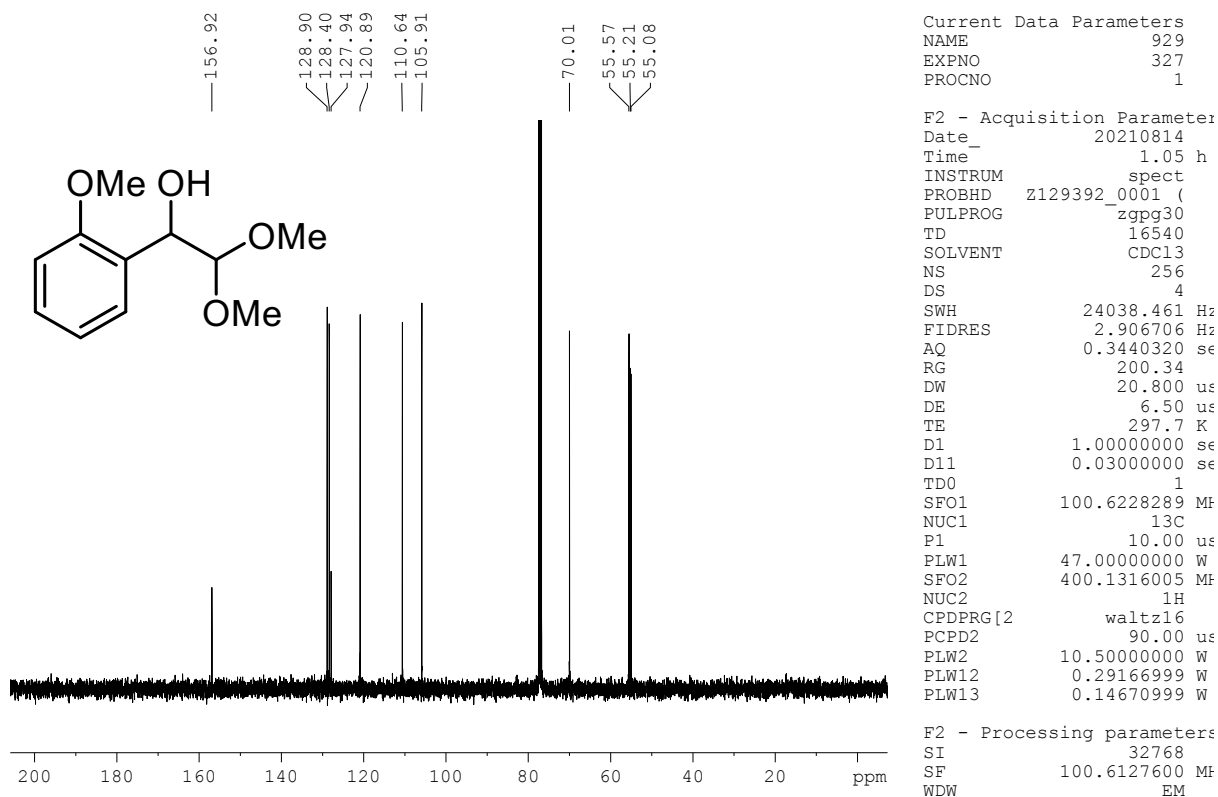

<sup>13</sup>C{<sup>1</sup>H} NMR (100 MHz, CDCl<sub>3</sub>, 24 °C) of the compound 1d

**1-(furan-2-yl)-2,2-dimethoxyethan-1-ol:1e**

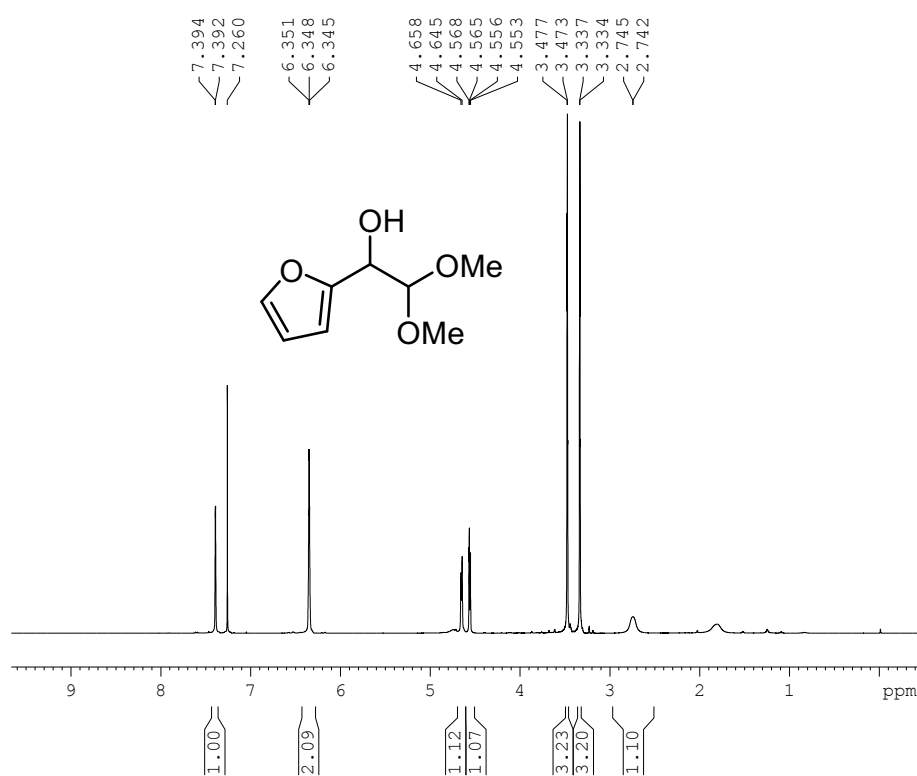

Current Data Parameters  
 NAME M529  
 EXPNO 10  
 PROCNO 1

F2 - Acquisition Paramete  
 Date\_ 20221109  
 Time 19.24  
 INSTRUM spect  
 PROBHD 5 mm PABBO BB/  
 PULPROG zg30  
 TD 32768  
 SOLVENT CDCl3  
 NS 32  
 DS 2  
 SWH 10000.000 H  
 FIDRES 0.305176 H  
 AQ 1.6384000 s  
 RG 64  
 DW 50.000 u  
 DE 6.50 u  
 TE 300.6 K  
 D1 0.50000000 s  
 TD0 1

===== CHANNEL f1 =====  
 SFO1 500.1525008 M  
 NUC1 1H  
 P1 11.75 u  
 PLW1 15.30000019 W

F2 - Processing parameter  
 SI 65536  
 SF 500.1500119 M  
 WDW EM  
 SSB 0  
 LB 0.30 H  
 GB 0  
 PC 1.00

<sup>1</sup>H NMR (400 MHz, CDCl<sub>3</sub>, 24 °C) of the compound **1e**

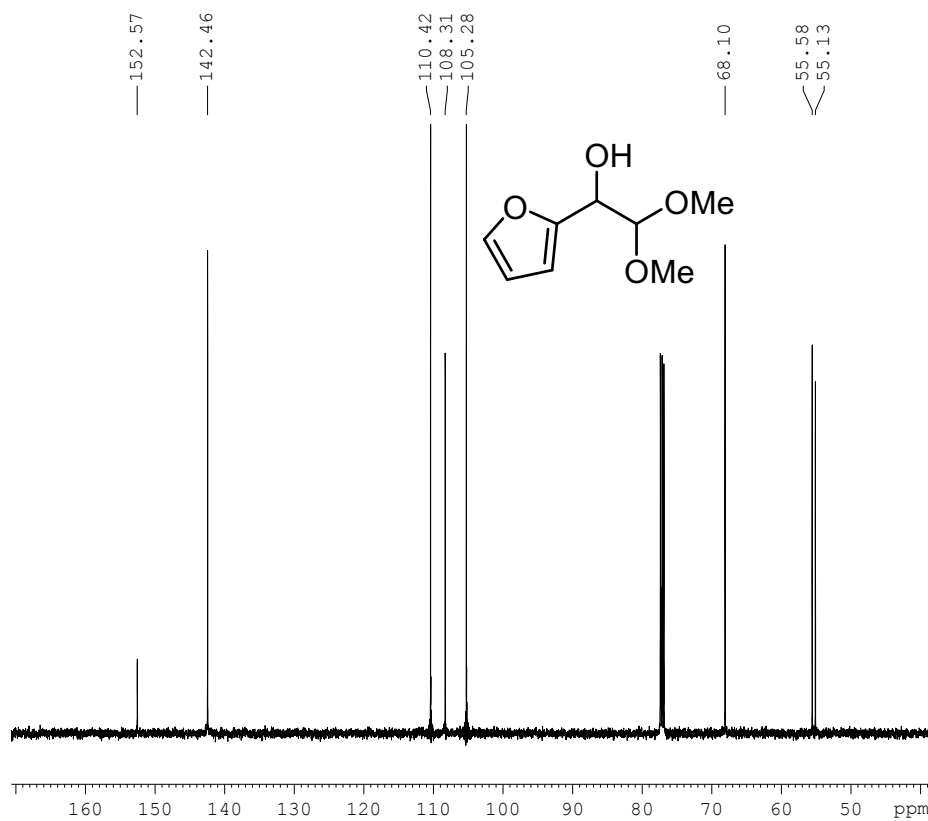

Current Data Parameters  
 NAME M529  
 EXPNO 11  
 PROCNO 1

F2 - Acquisition Parameters  
 Date\_ 20221109  
 Time 19.37  
 INSTRUM spect  
 PROBHD 5 mm PABBO BB/  
 PULPROG zgpg30  
 TD 20480  
 SOLVENT CDCl3  
 NS 512  
 DS 4  
 SWH 29761.904 Hz  
 FIDRES 1.453218 Hz  
 AQ 0.3440640 sec  
 RG 202.34  
 DW 16.800 usec  
 DE 6.50 usec  
 TE 301.2 K  
 D1 1.00000000 sec  
 D11 0.03000000 sec  
 TD0 1

===== CHANNEL f1 =====  
 SFO1 125.7753932 MHz  
 NUC1 13C  
 P1 10.20 usec  
 PLW1 103.00000000 W

===== CHANNEL f2 =====  
 SFO2 500.1520006 MHz  
 NUC2 1H  
 CPDPRG[2] waltz16  
 FCPD2 80.00 usec  
 PLW2 15.30000019 W  
 PLW12 0.39658999 W  
 PLW13 0.19948000 W

F2 - Processing parameters  
 SI 32768  
 SF 125.7628069 MHz  
 WDW EM  
 SSB 0  
 LB 1.00 Hz  
 GB 0  
 PC 1.40

<sup>13</sup>C{<sup>1</sup>H} NMR (100 MHz, CDCl<sub>3</sub>, 24 °C) of the compound **1e**

### 1-(4-fluorophenyl)-2,2-dimethoxyethan-1-ol: **1f**

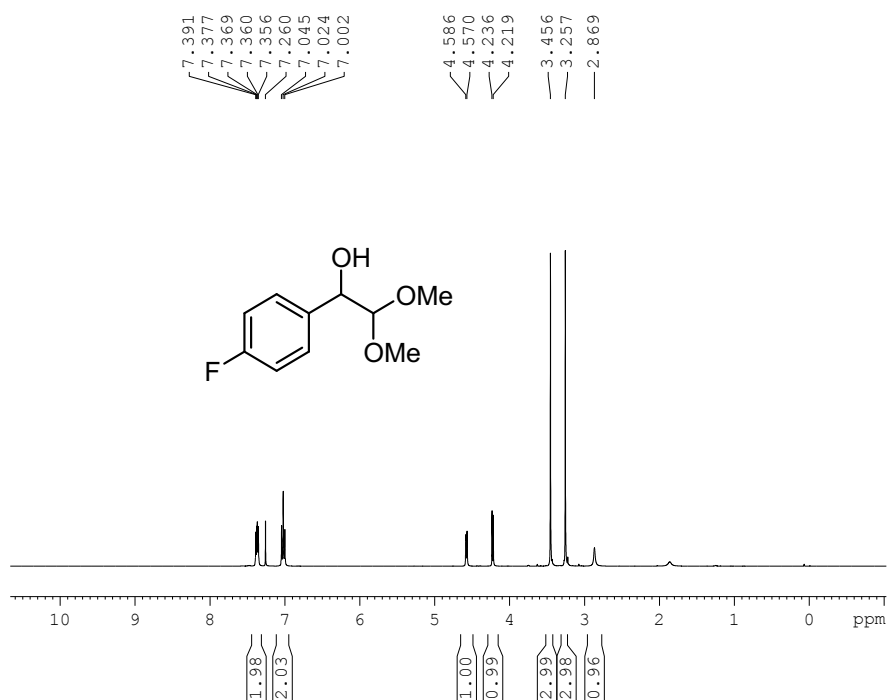

Current Data Parameters  
 NAME M559  
 EXPNO 350  
 PROCNO 1

F2 - Acquisition Parameters  
 Date\_ 20221126  
 Time\_ 15.02 h  
 INSTRUM spect  
 PROBHD Z129392\_0001 (  
 PULPROG zg30  
 TD 65536  
 SOLVENT CDCl3  
 NS 16  
 DS 2  
 SWH 8012.820 Hz  
 FIDRES 0.244532 Hz  
 AQ 4.0894465 sec  
 RG 88.51  
 DW 62.400 usec  
 DE 6.50 usec  
 TE 297.7 K  
 D1 0.50000000 sec  
 TD0 1  
 SFO1 400.1320007 MHz  
 NUC1 1H  
 P1 15.00 usec  
 PLW1 10.50000000 W

F2 - Processing parameters  
 SI 65536  
 SF 400.1300095 MHz  
 WDW EM  
 SSB 0  
 LB 0.30 Hz  
 GB 0  
 PC 1.00

### <sup>1</sup>H NMR (400 MHz, CDCl<sub>3</sub>, 24 °C) of the compound **1f**

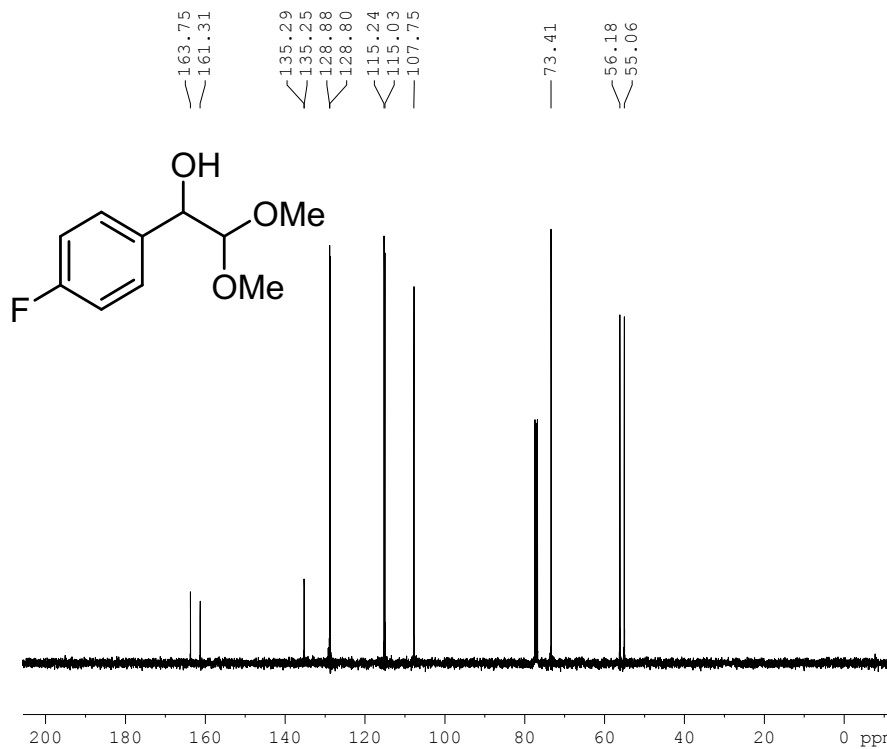

Current Data Parameters  
 NAME M559  
 EXPNO 351  
 PROCNO 1

F2 - Acquisition Paramete  
 Date\_ 20221126  
 Time\_ 15.09 h  
 INSTRUM spect  
 PROBHD Z129392\_0001 (  
 PULPROG zgpg30  
 TD 16540  
 SOLVENT CDCl3  
 NS 256  
 DS 4  
 SWH 24038.461 H  
 FIDRES 2.906706 H  
 AQ 0.3440320 s  
 RG 200.34  
 DW 20.800 u  
 DE 6.50 u  
 TE 298.2 K  
 D1 1.00000000 s  
 D11 0.03000000 s  
 TD0 1  
 SFO1 100.6228289 M  
 NUC1 13C  
 P1 10.00 u  
 PLW1 47.00000000 W  
 SFO2 400.1316005 M  
 NUC2 1H  
 CPDPRG[2] waltz16  
 PCPD2 90.00 u  
 PLW2 10.50000000 W  
 PLW12 0.29166999 W  
 PLW13 0.14670999 W

F2 - Processing parameter  
 CT 32768

### <sup>13</sup>C{<sup>1</sup>H} NMR (100 MHz, CDCl<sub>3</sub>, 24 °C) of the compound **1f**



## 2,2-dimethoxy-1-(4-(trifluoromethyl)phenyl)ethan-1-ol: **1g**

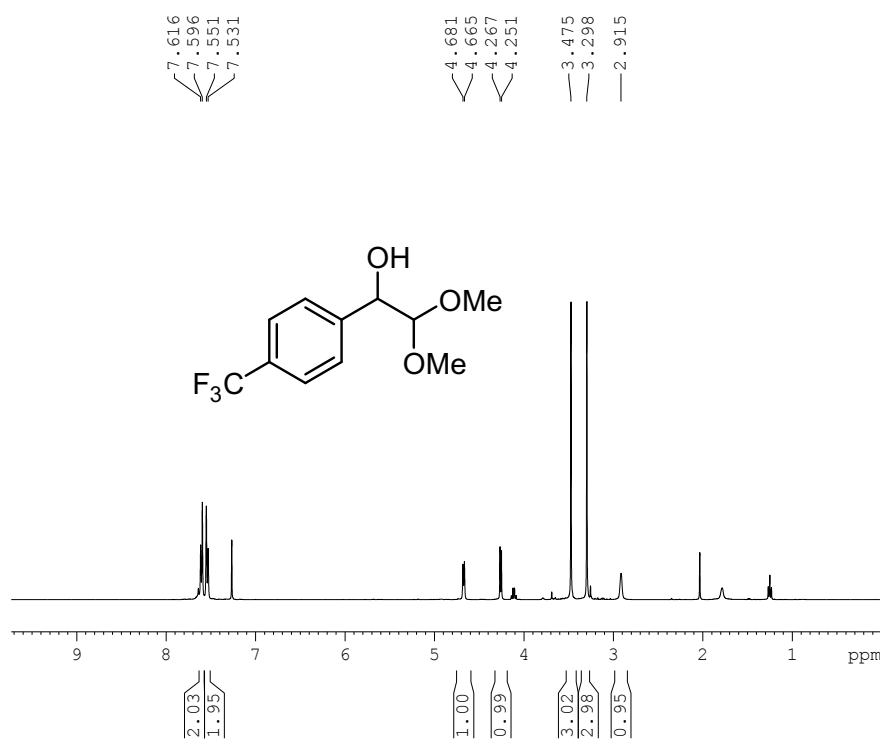

Current Data Parameters  
 NAME M657  
 EXPNO 313  
 PROCNO 1

F2 - Acquisition Parameters  
 Date\_ 20230113  
 Time\_ 2.36 h  
 INSTRUM spect  
 PROBHD Z129392\_0001 (  
 PULPROG zg30  
 TD 65536  
 SOLVENT CDC13  
 NS 16  
 DS 2  
 SWH 8012.820 Hz  
 FIDRES 0.244532 Hz  
 AQ 4.0894465 sec  
 RG 95.73  
 DW 62.400 usec  
 DE 6.50 usec  
 TE 297.6 K  
 D1 0.50000000 sec  
 TD0 1  
 SFO1 400.1320007 MHz  
 NUC1 1H  
 P1 15.00 usec  
 PLW1 10.50000000 W

F2 - Processing parameters  
 SI 65536  
 SF 400.1300069 MHz  
 WDW EM  
 SSB 0  
 LB 0.30 Hz  
 GB 0  
 PC 1.00

$^1\text{H}$  NMR (400 MHz,  $\text{CDCl}_3$ , 24 °C) of the compound **1g**

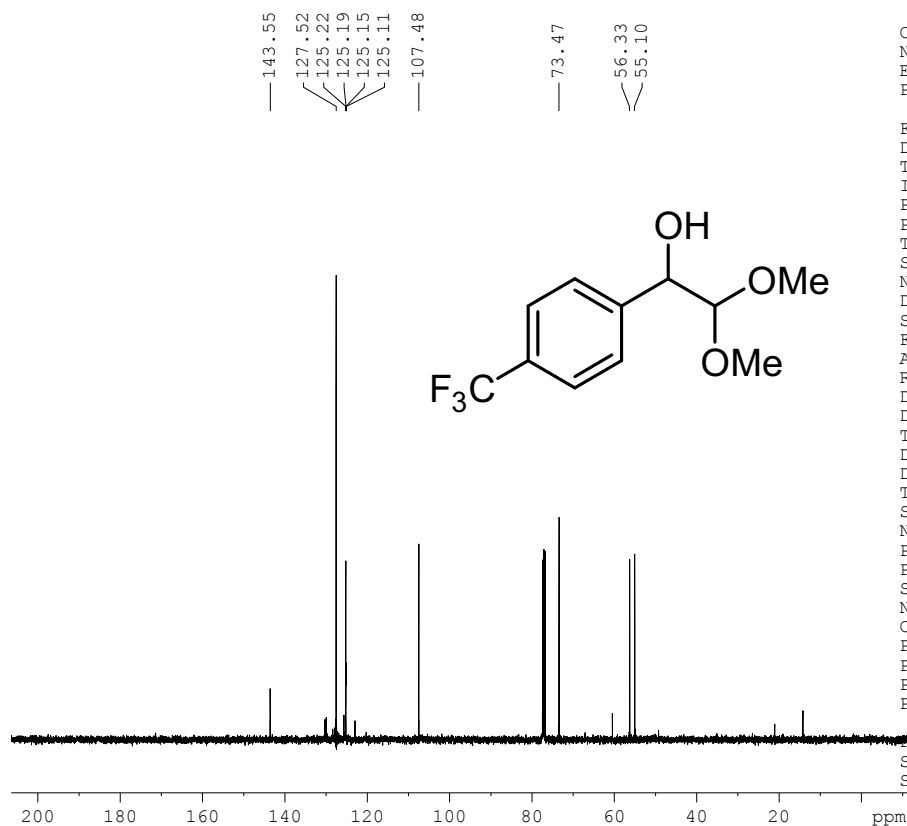

Current Data Parameters  
 NAME M657  
 EXPNO 314  
 PROCNO 1

F2 - Acquisition Parameters  
 Date\_ 20230113  
 Time\_ 2.42 h  
 INSTRUM spect  
 PROBHD Z129392\_0001 (  
 PULPROG zgpg30  
 TD 16540  
 SOLVENT CDC13  
 NS 256  
 DS 4  
 SWH 24038.461 Hz  
 FIDRES 2.906706 Hz  
 AQ 0.3440320 sec  
 RG 200.34  
 DW 20.800 usec  
 DE 6.50 usec  
 TE 297.9 K  
 D1 1.00000000 sec  
 D11 0.03000000 sec  
 TD0 1  
 SFO1 100.6228289 MHz  
 NUC1 13C  
 P1 10.00 usec  
 PLW1 47.00000000 W  
 SFO2 400.1316005 MHz  
 NUC2 1H  
 CPDPRG[2] waltz16  
 PCPD2 90.00 usec  
 PLW2 10.50000000 W  
 PLW12 0.29166999 W  
 PLW13 0.14670999 W

F2 - Processing parameters  
 SI 32768  
 SF 100.6127581 MHz

$^{13}\text{C}\{^1\text{H}\}$  NMR (100 MHz,  $\text{CDCl}_3$ , 24 °C) of the compound **1g**

### 1-(2-aminophenyl)-2-methylpropan-1-one: 2b

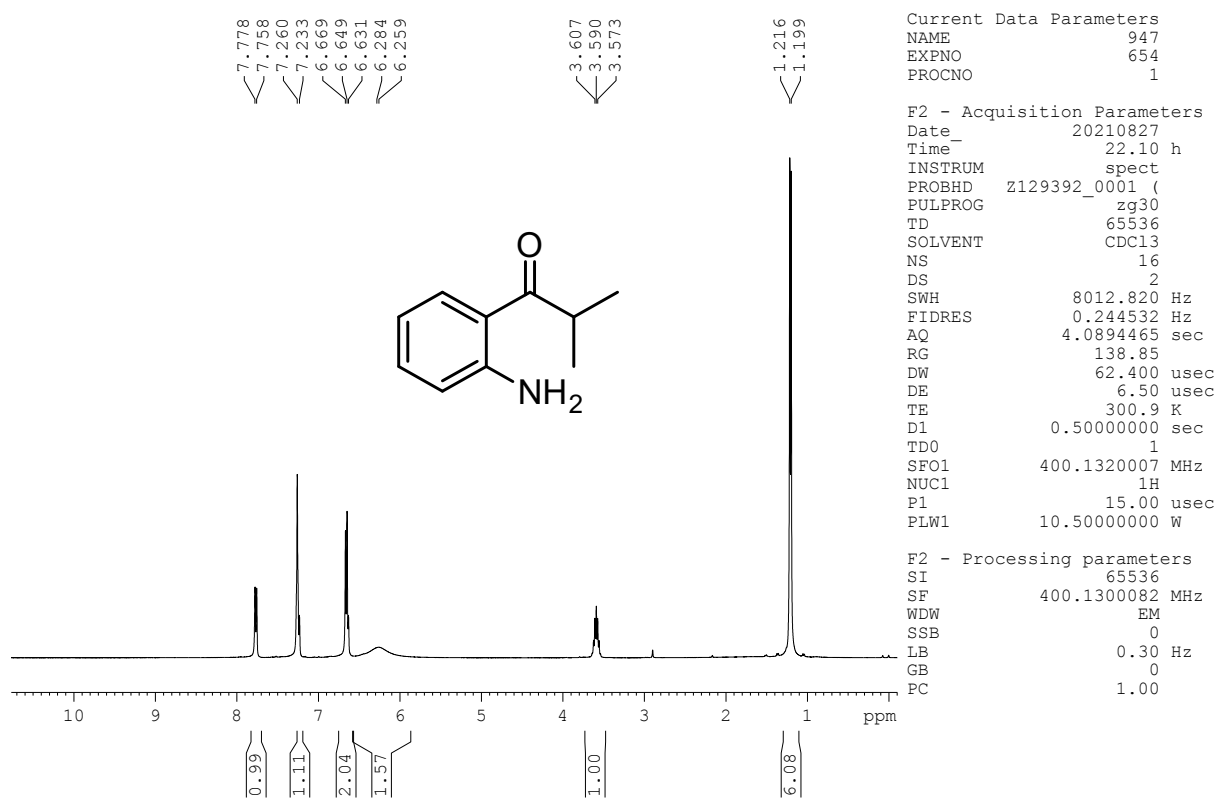

### <sup>1</sup>H NMR (400 MHz, CDCl<sub>3</sub>, 24 °C) of the compound 2b

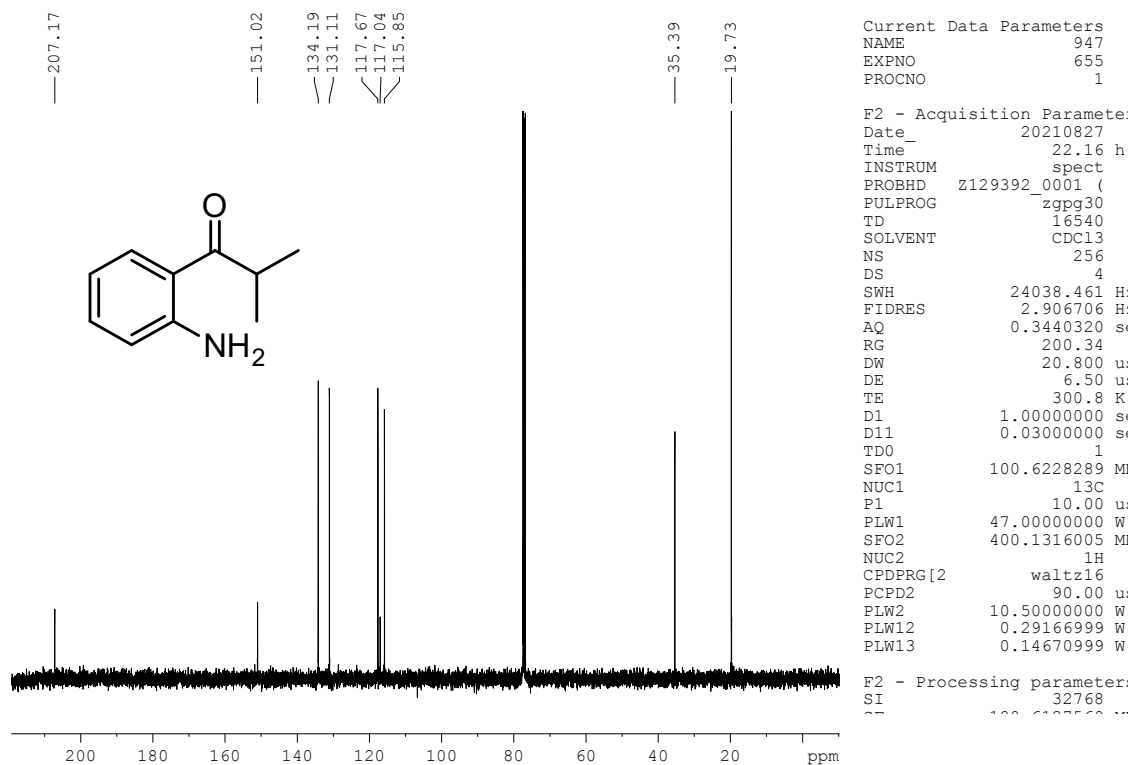

### <sup>13</sup>C {<sup>1</sup>H} NMR (100 MHz, CDCl<sub>3</sub>, 24 °C) of the compound 2b

### (2-aminophenyl)(cyclopentyl)methanone: 2d

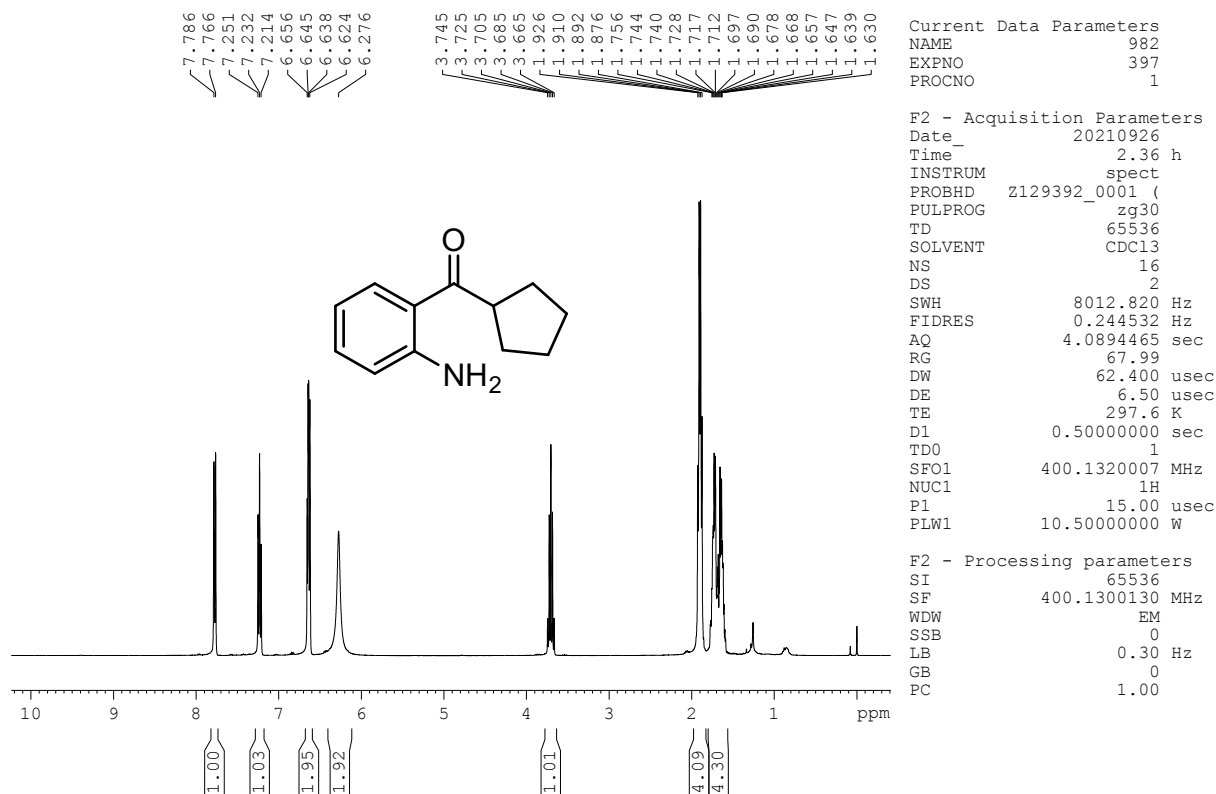

### <sup>1</sup>H NMR (400 MHz, CDCl<sub>3</sub>, 24 °C) of the compound 2d

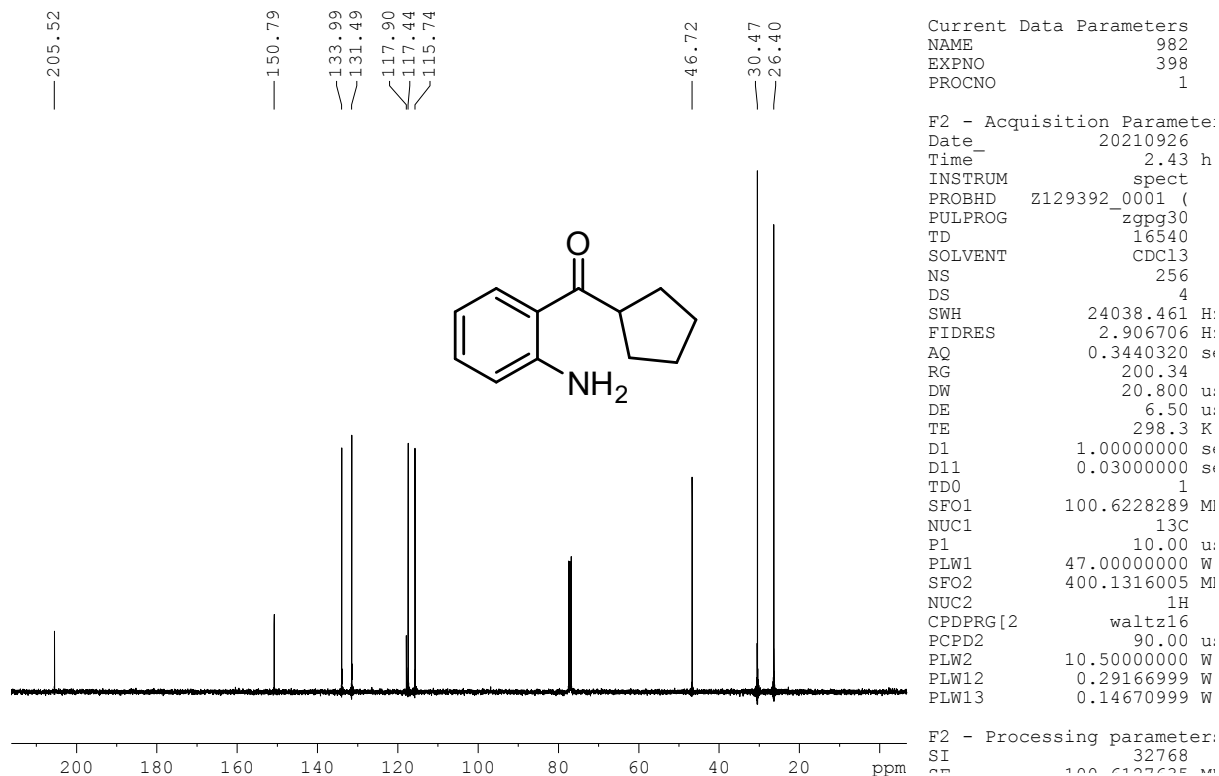

### <sup>13</sup>C{<sup>1</sup>H} NMR (100 MHz, CDCl<sub>3</sub>, 24 °C) of the compound 2d

### (3-methyl-1H-indol-2-yl)(phenyl)methanone: 3a

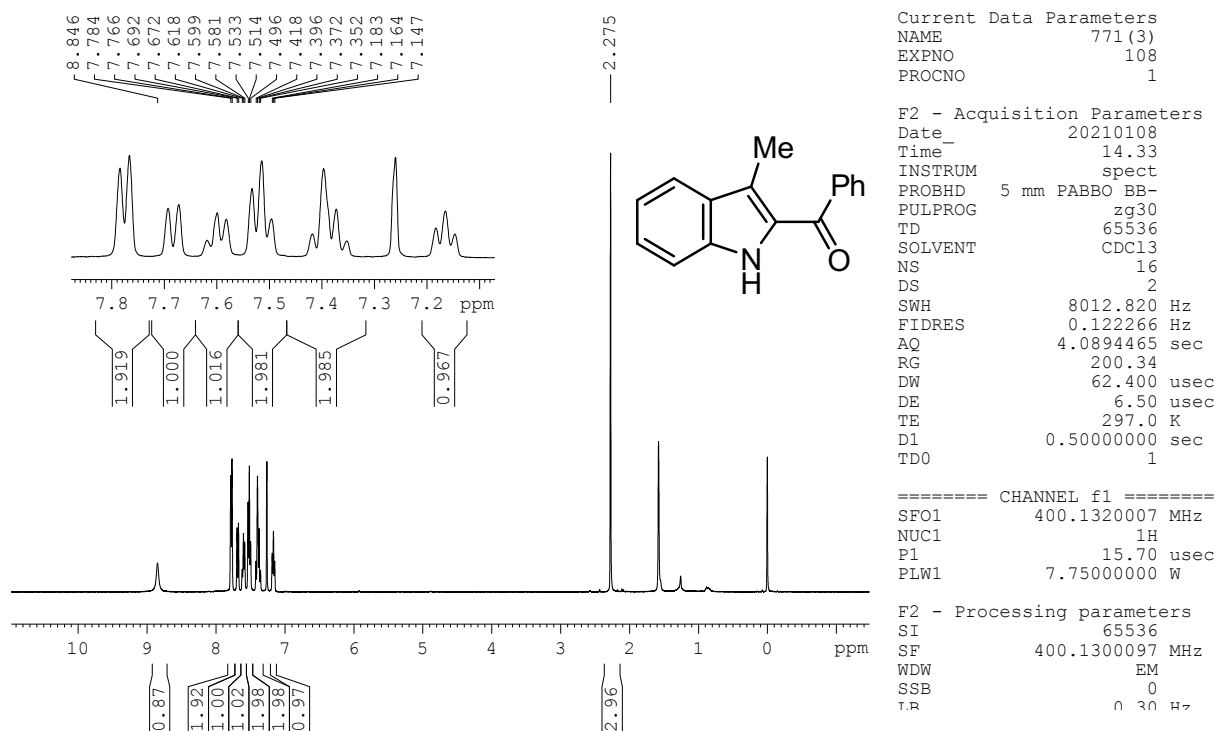

<sup>1</sup>H NMR (400 MHz, CDCl<sub>3</sub>, 24 °C) of the compound 3a

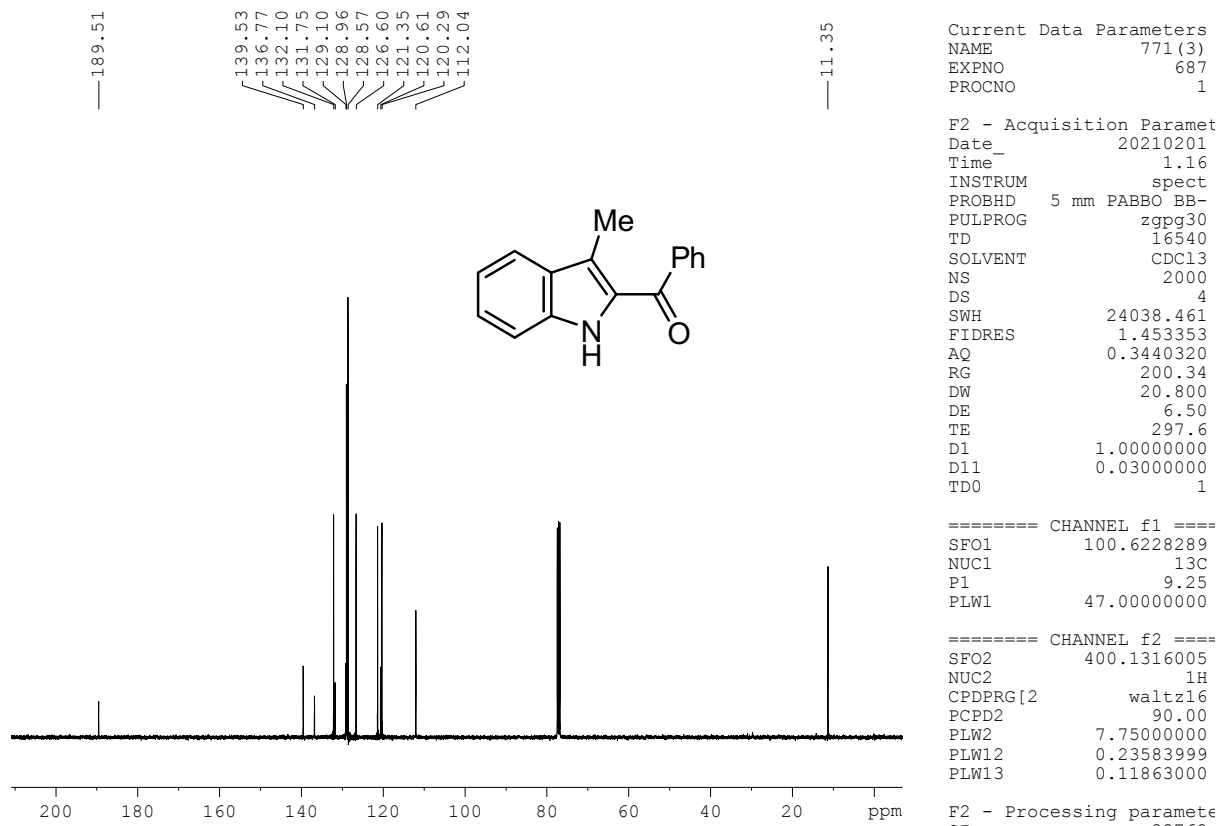

<sup>13</sup>C{<sup>1</sup>H} NMR (100 MHz, CDCl<sub>3</sub>, 24 °C) of the compound 3a

### (3-isopropyl-1H-indol-2-yl)(phenyl)methanone: **3b**

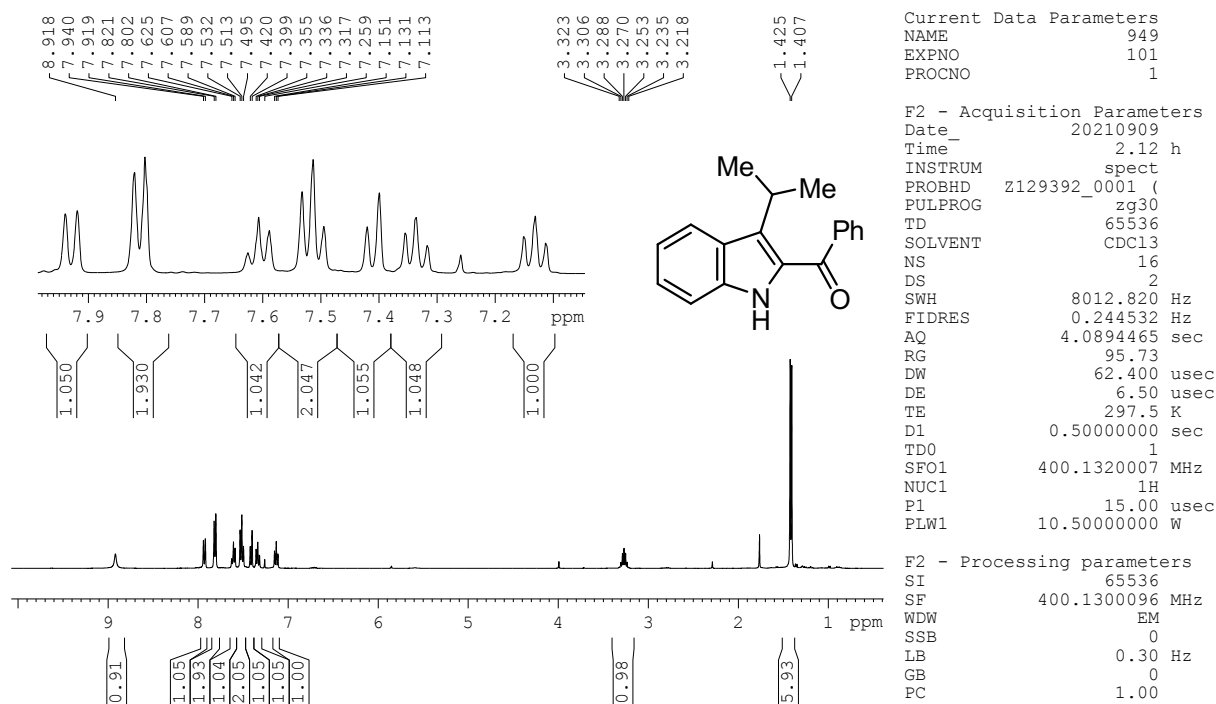

<sup>1</sup>H NMR (400 MHz, CDCl<sub>3</sub>, 24 °C) of the compound **3b**

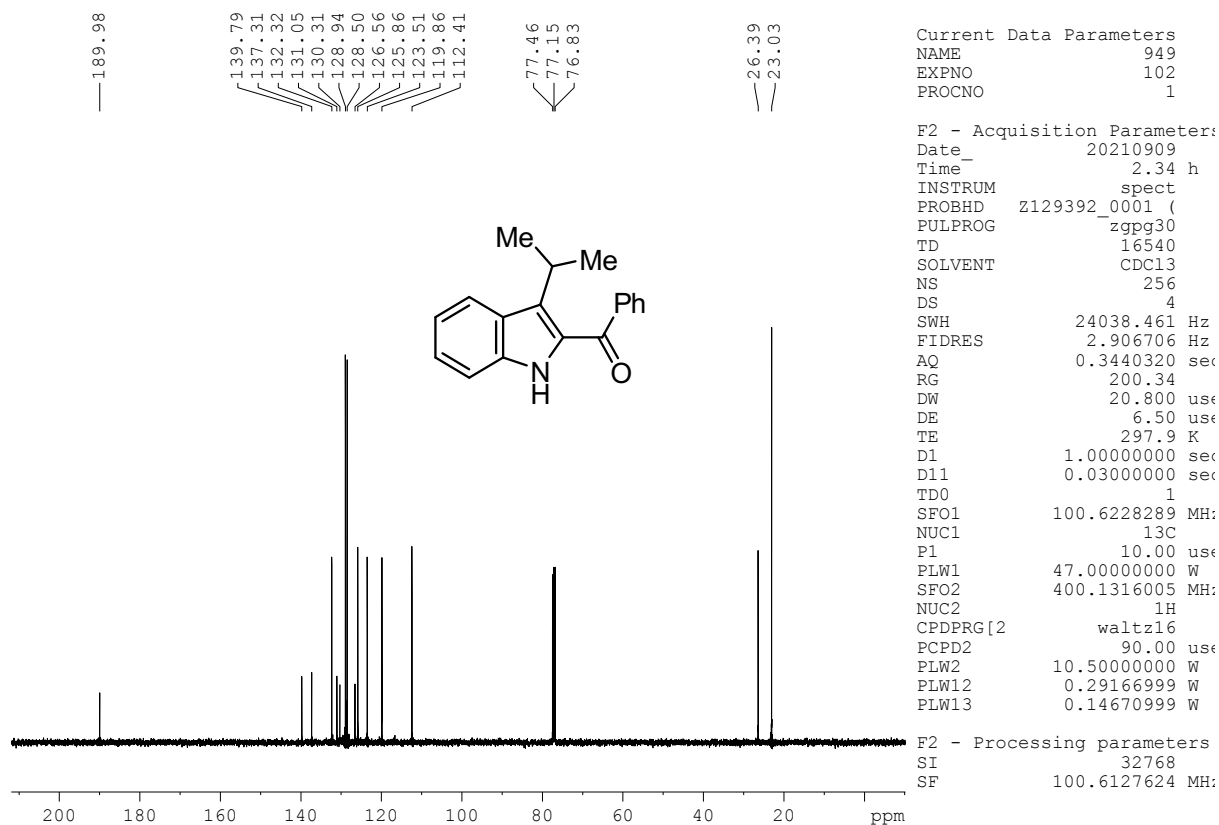

<sup>13</sup>C{<sup>1</sup>H} NMR (100 MHz, CDCl<sub>3</sub>, 24 °C) of the compound **3b**

(1H-indol-2-yl)(phenyl)methanone: 3c

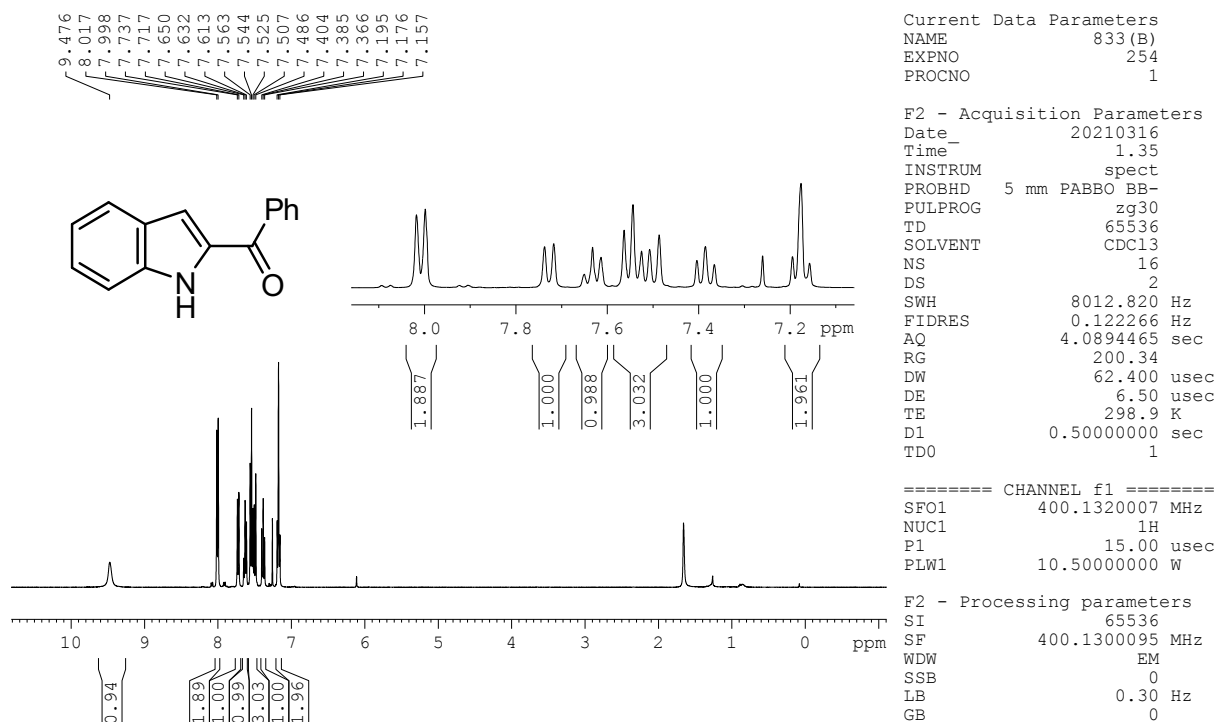

<sup>1</sup>H NMR (400 MHz, CDCl<sub>3</sub>, 24 °C) of the compound 3c

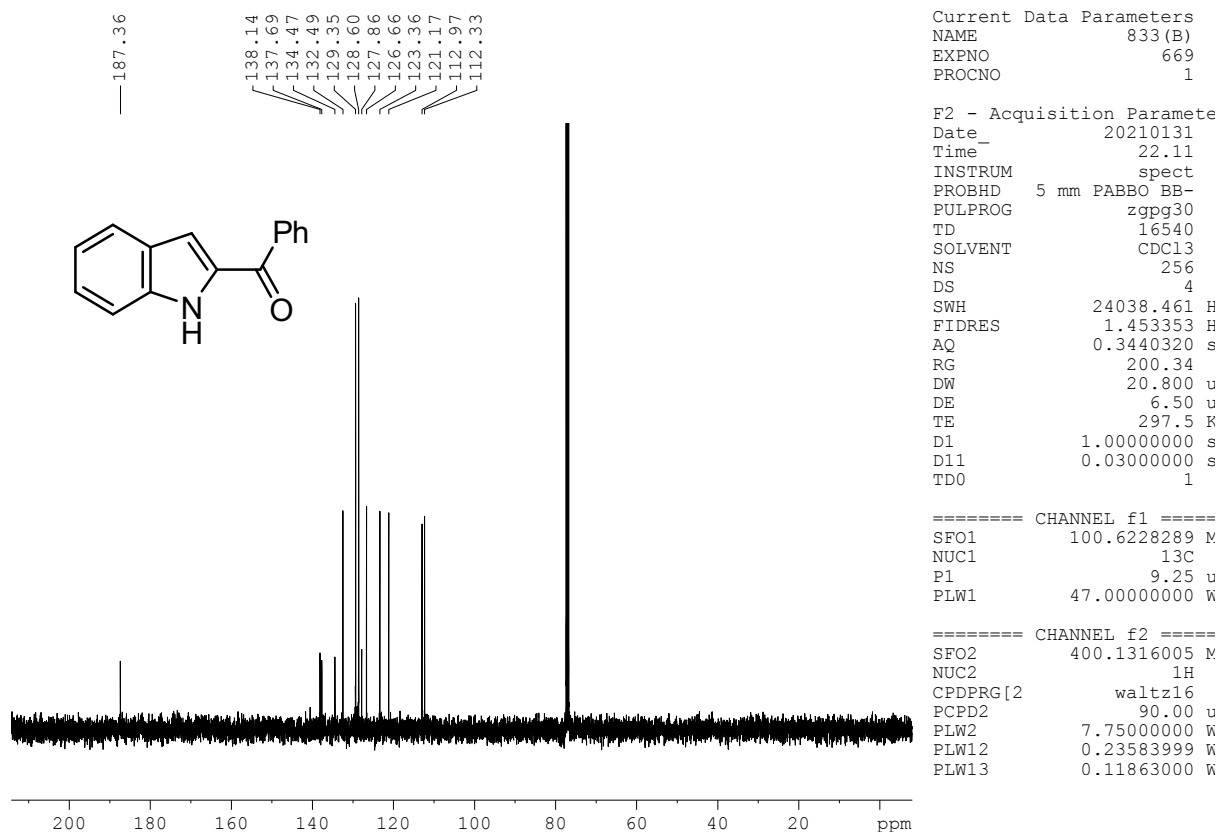

<sup>13</sup>C{<sup>1</sup>H} NMR (100 MHz, CDCl<sub>3</sub>, 24 °C) of the compound 3c

**(3-cyclopentyl-1H-indol-2-yl)(phenyl)methanone: 3d**

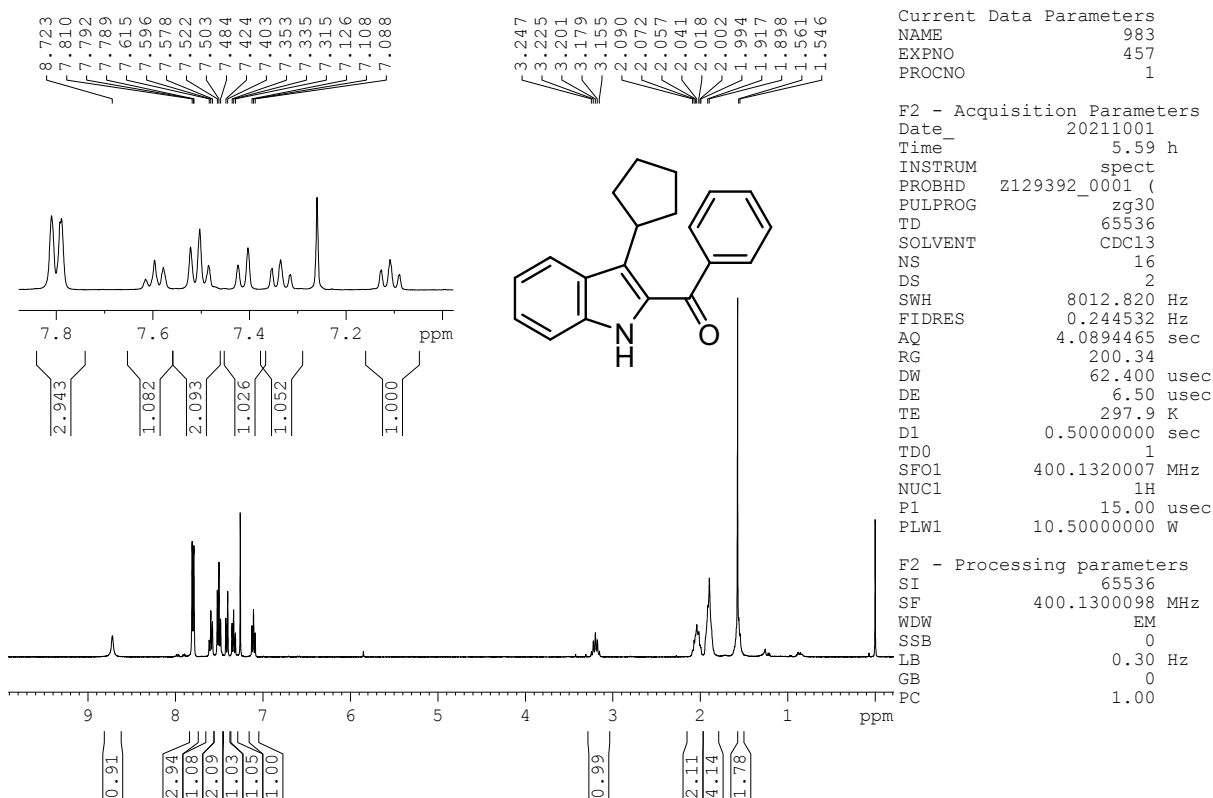

<sup>1</sup>H NMR (400 MHz, CDCl<sub>3</sub>, 24 °C) of the compound 3d

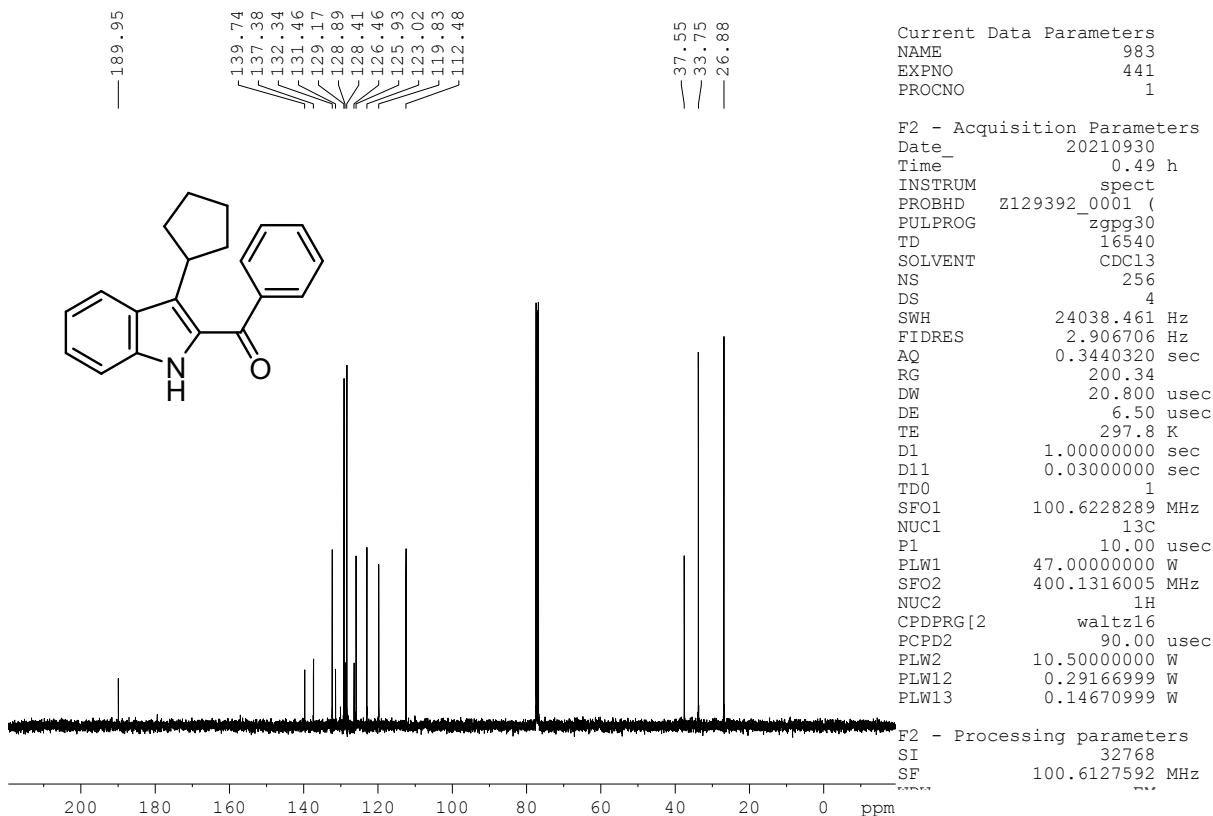

<sup>13</sup>C{<sup>1</sup>H} NMR (100 MHz, CDCl<sub>3</sub>, 24 °C) of the compound 3d

### (E)-phenyl(3-styryl-1H-indol-2-yl)methanone: 3e

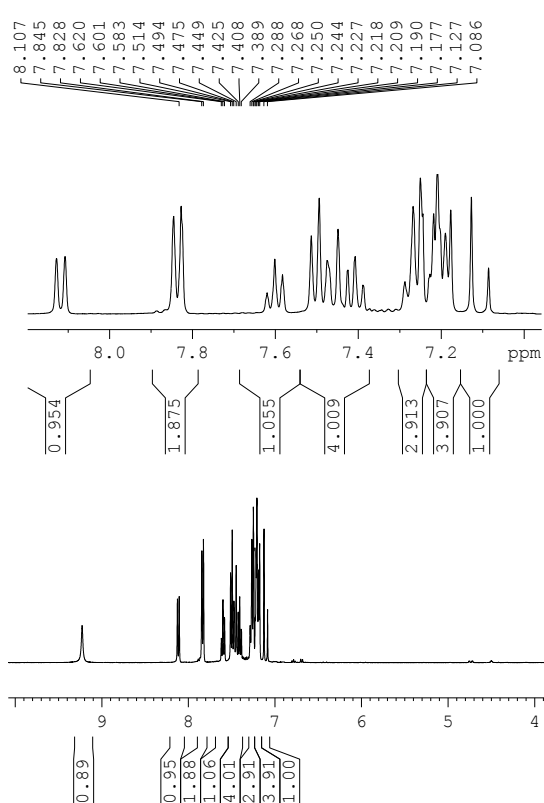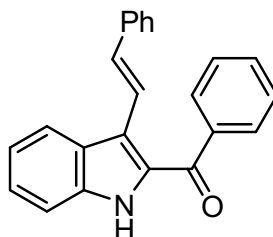

Current Data Parameters  
NAME 984  
EXPNO 431  
PROCNO 1

F2 - Acquisition Parameters  
Date\_ 20210929  
Time 2.42 h  
INSTRUM spect  
PROBHD z129392\_0001 (  
PULPROG zg30  
TD 65536  
SOLVENT CDC13  
NS 16  
DS 2  
SWH 8012.820 Hz  
FIDRES 0.244532 Hz  
AQ 4.0894465 sec  
RG 169.77  
DW 62.400 usec  
DE 6.50 usec  
TE 297.7 K  
D1 0.50000000 sec  
TD0 1  
SFO1 400.1320007 MHz  
NUC1 1H  
P1 15.00 usec  
PLW1 10.50000000 W

F2 - Processing parameters  
SI 65536  
SF 400.1300160 MHz  
WDW EM  
SSB 0  
LB 0.30 Hz  
GB 0  
PC 1.00

### <sup>1</sup>H NMR (400 MHz, CDCl<sub>3</sub>, 24 °C) of the compound 3e

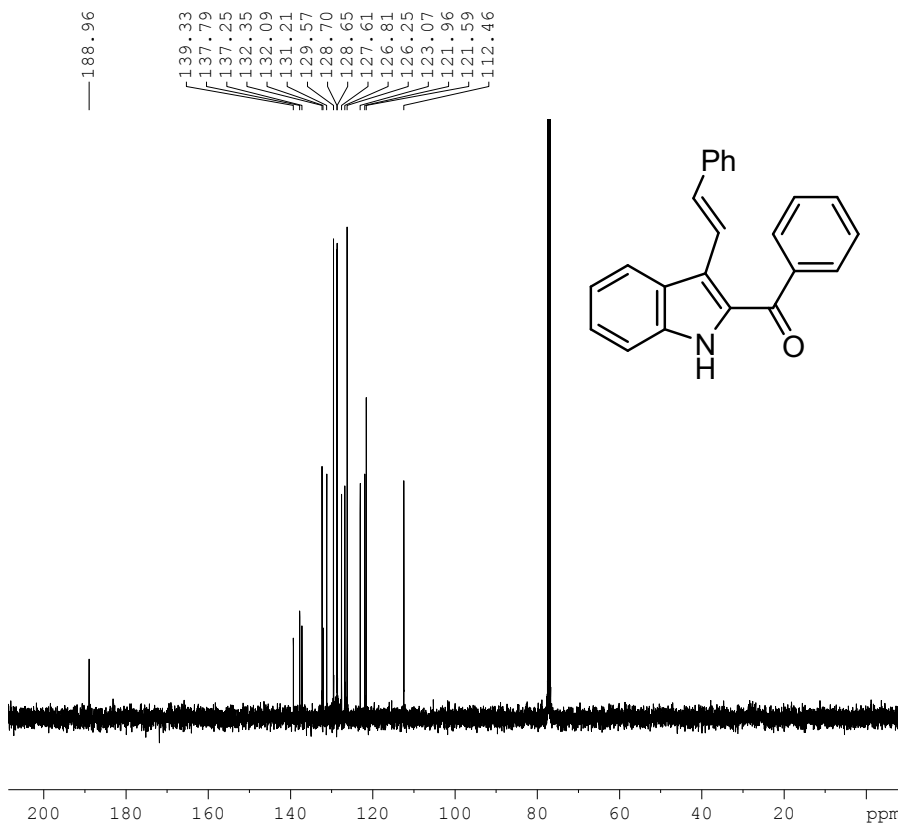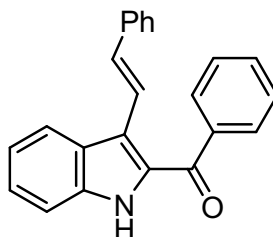

Current Data Parameters  
NAME 984  
EXPNO 432  
PROCNO 1

F2 - Acquisition Parameters:  
Date\_ 20210929  
Time 2.52 h  
INSTRUM spect  
PROBHD z129392\_0001 (  
PULPROG zgpg30  
TD 16540  
SOLVENT CDC13  
NS 256  
DS 4  
SWH 24038.461 Hz  
FIDRES 2.906706 Hz  
AQ 0.3440320 sec  
RG 200.34  
DW 20.800 usec  
DE 6.50 usec  
TE 298.2 K  
D1 1.00000000 sec  
D11 0.03000000 sec  
TD0 1  
SFO1 100.6228289 MHz  
NUC1 13C  
P1 10.00 usec  
PLW1 47.00000000 W  
SFO2 400.1316005 MHz  
NUC2 1H  
CPDPRG[2] waltz16  
PCPD2 90.00 usec  
PLW2 10.50000000 W  
PLW12 0.29166999 W  
PLW13 0.14670999 W

F2 - Processing parameters  
SI 32768  
SF 100.6127589 MHz  
WDW FM

### <sup>13</sup>C{<sup>1</sup>H} NMR (100 MHz, CDCl<sub>3</sub>, 24 °C) of the compound 3e



phenyl(3-phenyl-1H-indol-2-yl)methanone: 3f

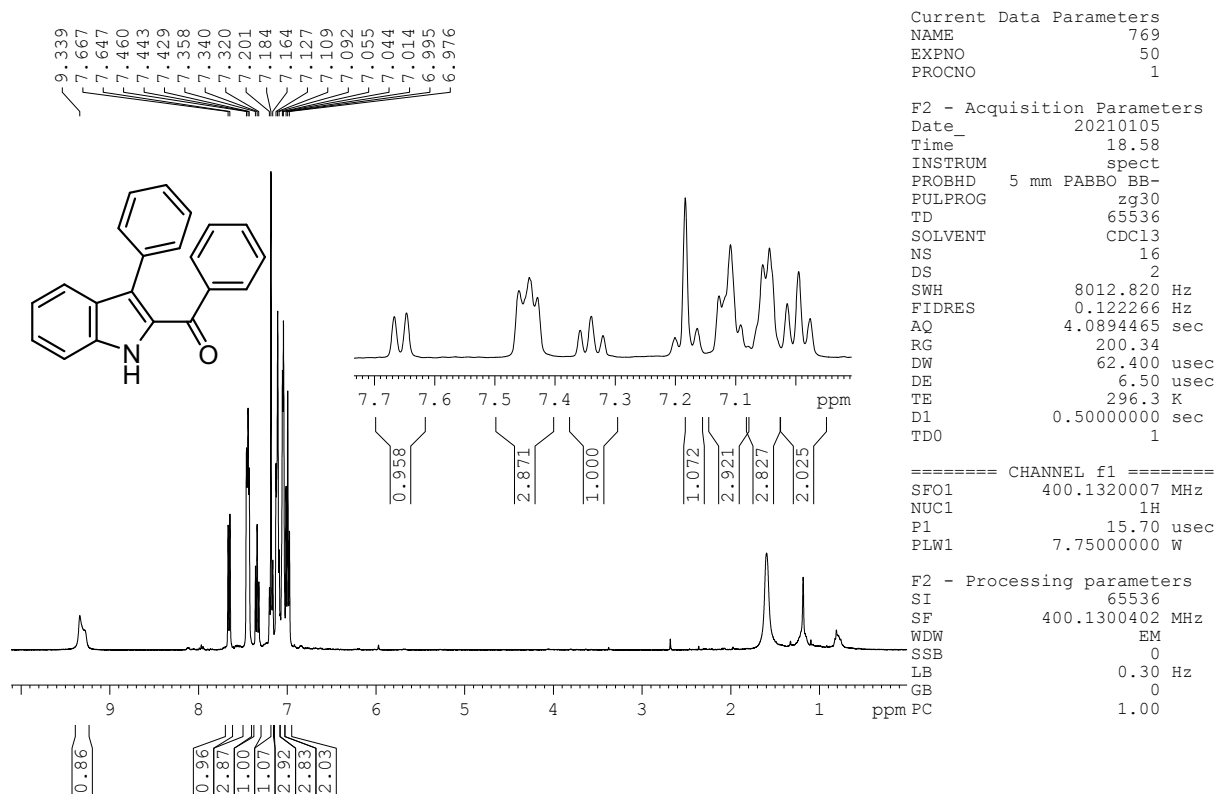

<sup>1</sup>H NMR (400 MHz, CDCl<sub>3</sub>, 24 °C) of the compound 3f

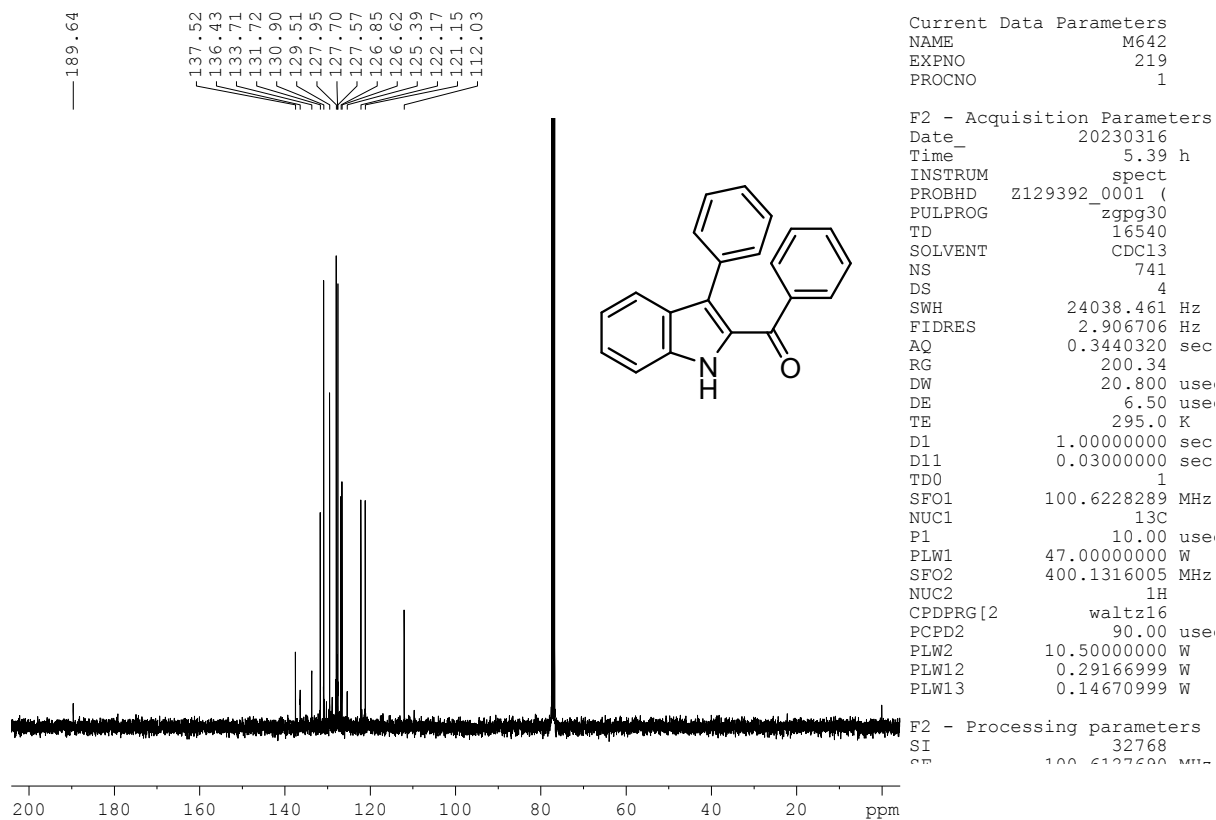

<sup>13</sup>C{<sup>1</sup>H} NMR (100 MHz, CDCl<sub>3</sub>, 24 °C) of the compound 3f

**(3-(4-bromophenyl)-1H-indol-2-yl)(phenyl)methanone: 3g**

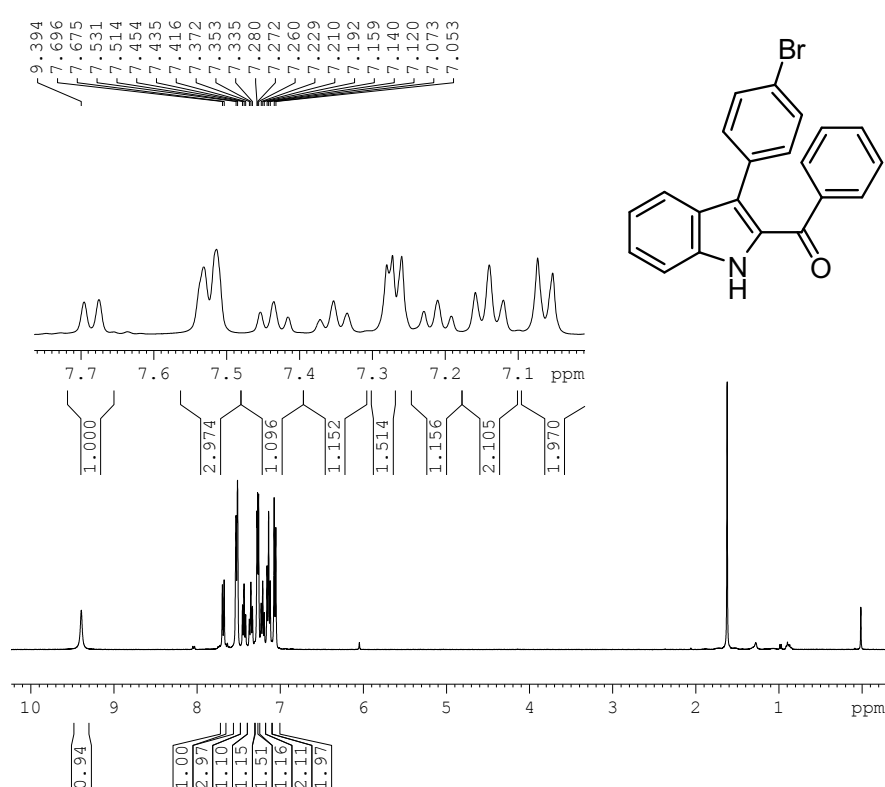

**<sup>1</sup>H NMR (400 MHz, CDCl<sub>3</sub>, 24 °C) of the compound 3g**

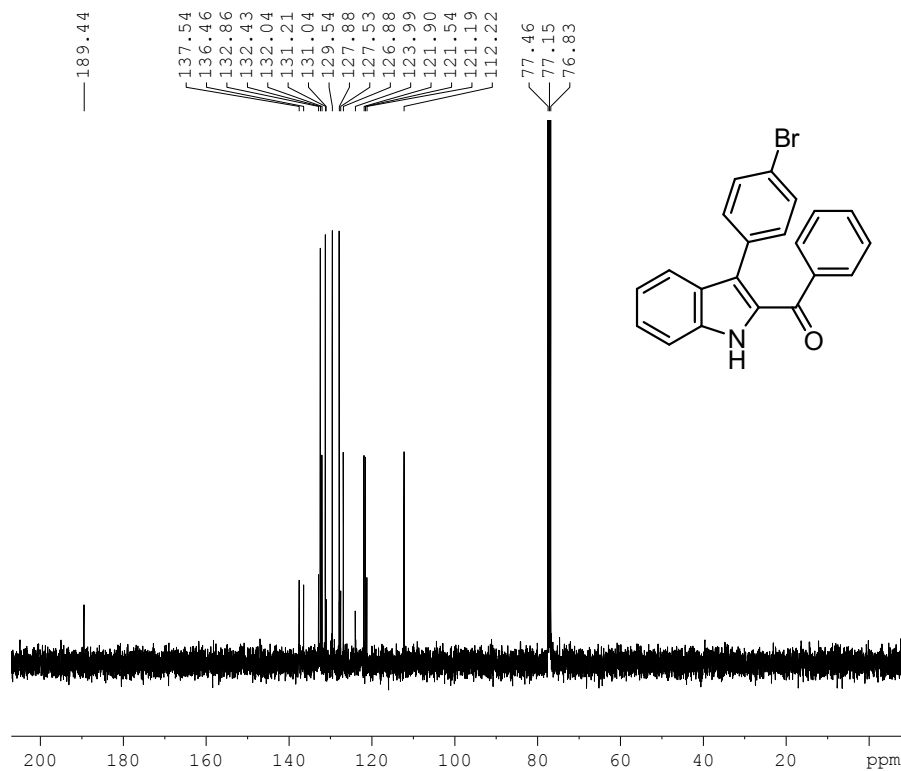

**<sup>13</sup>C{<sup>1</sup>H} NMR (100 MHz, CDCl<sub>3</sub>, 24 °C) of the compound 3g**

phenyl(3-(thiophen-2-yl)-1H-indol-2-yl)methanone: **3h**

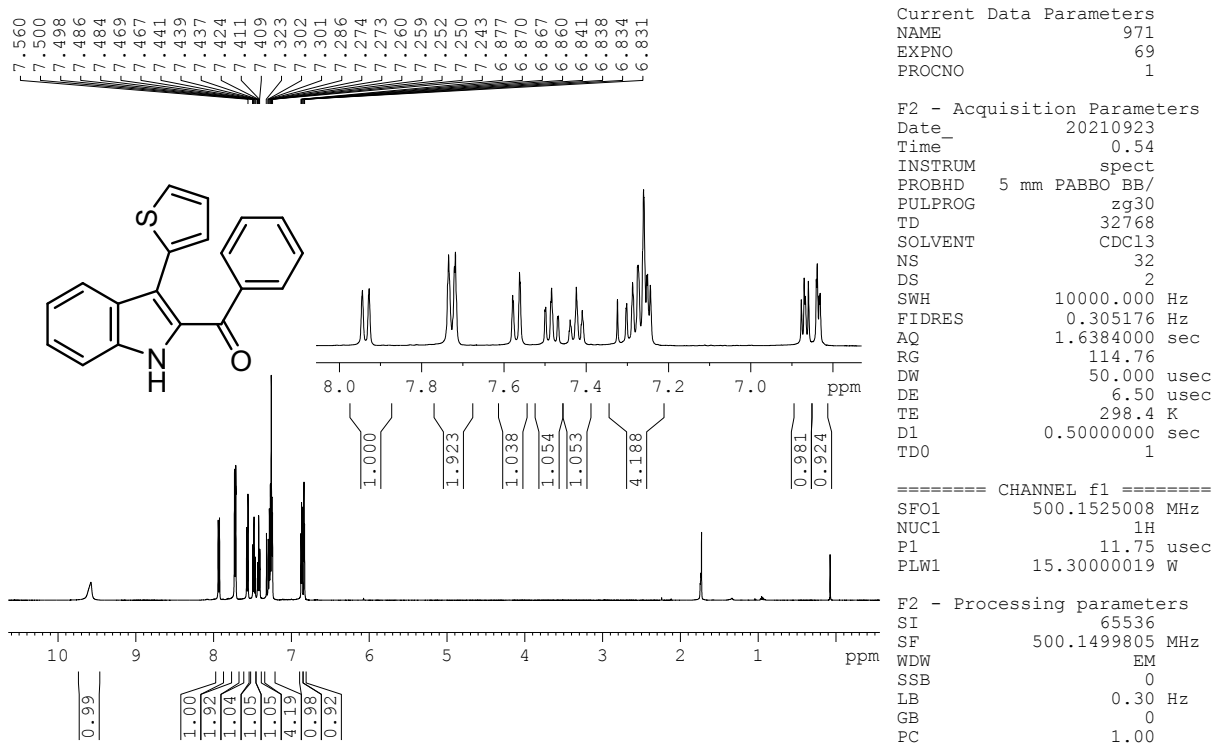

<sup>1</sup>H NMR (400 MHz, CDCl<sub>3</sub>, 24 °C) of the compound **3h**

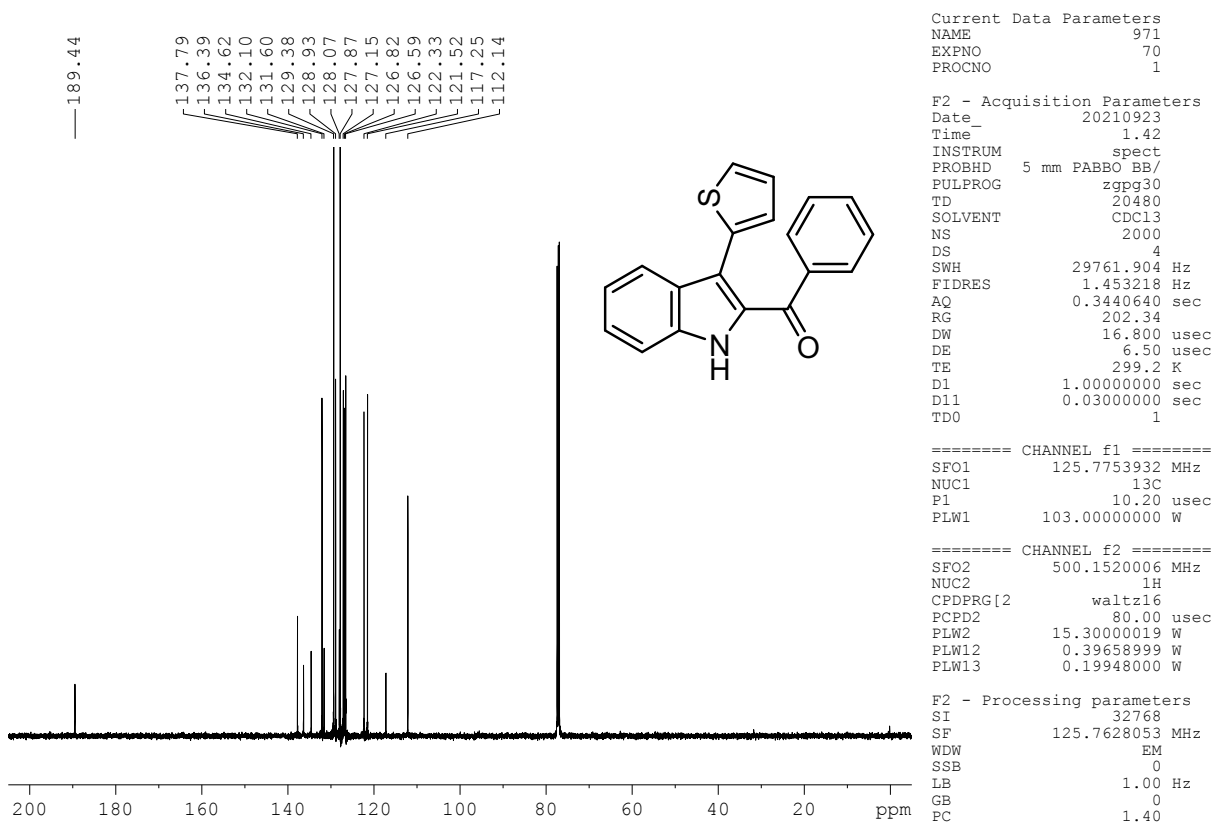

<sup>13</sup>C{<sup>1</sup>H} NMR (100 MHz, CDCl<sub>3</sub>, 24 °C) of the compound **3h**

(6-methyl-3-phenyl-1H-indol-2-yl)(phenyl)methanone: **3i**

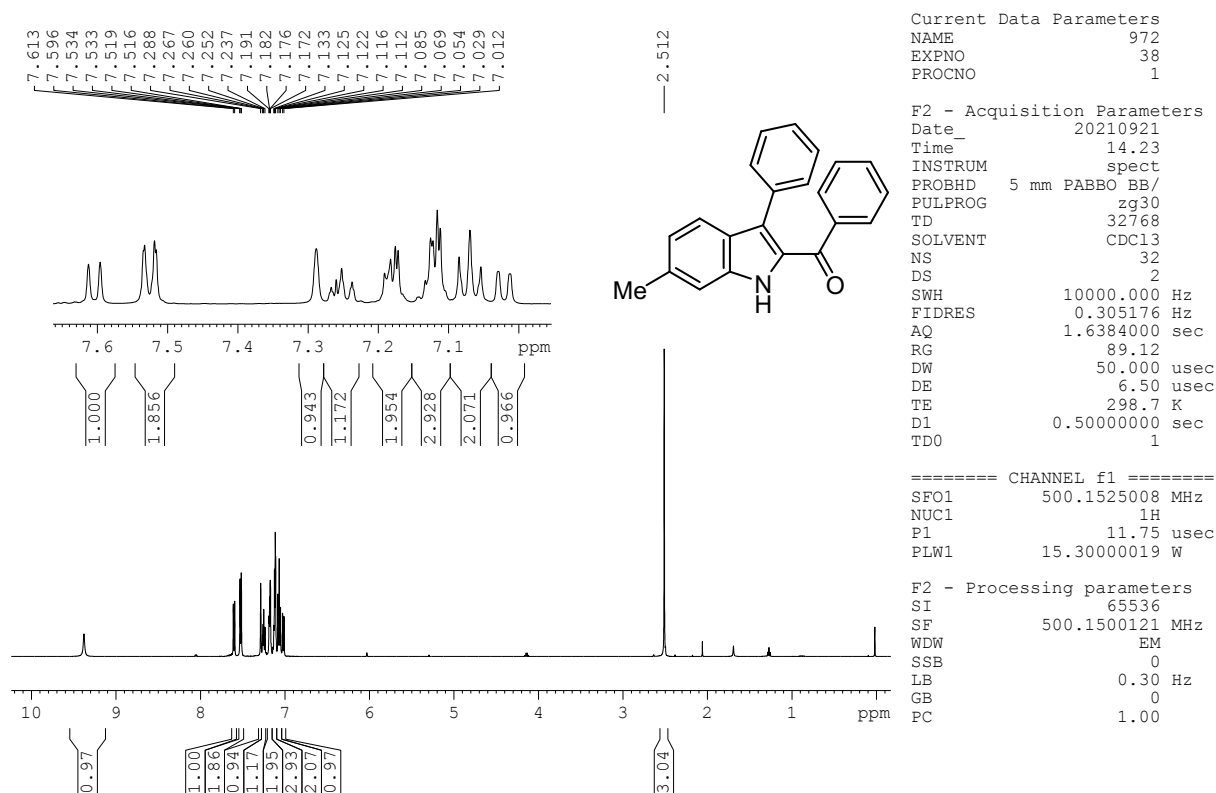

<sup>1</sup>H NMR (400 MHz, CDCl<sub>3</sub>, 24 °C) of the compound **3i**

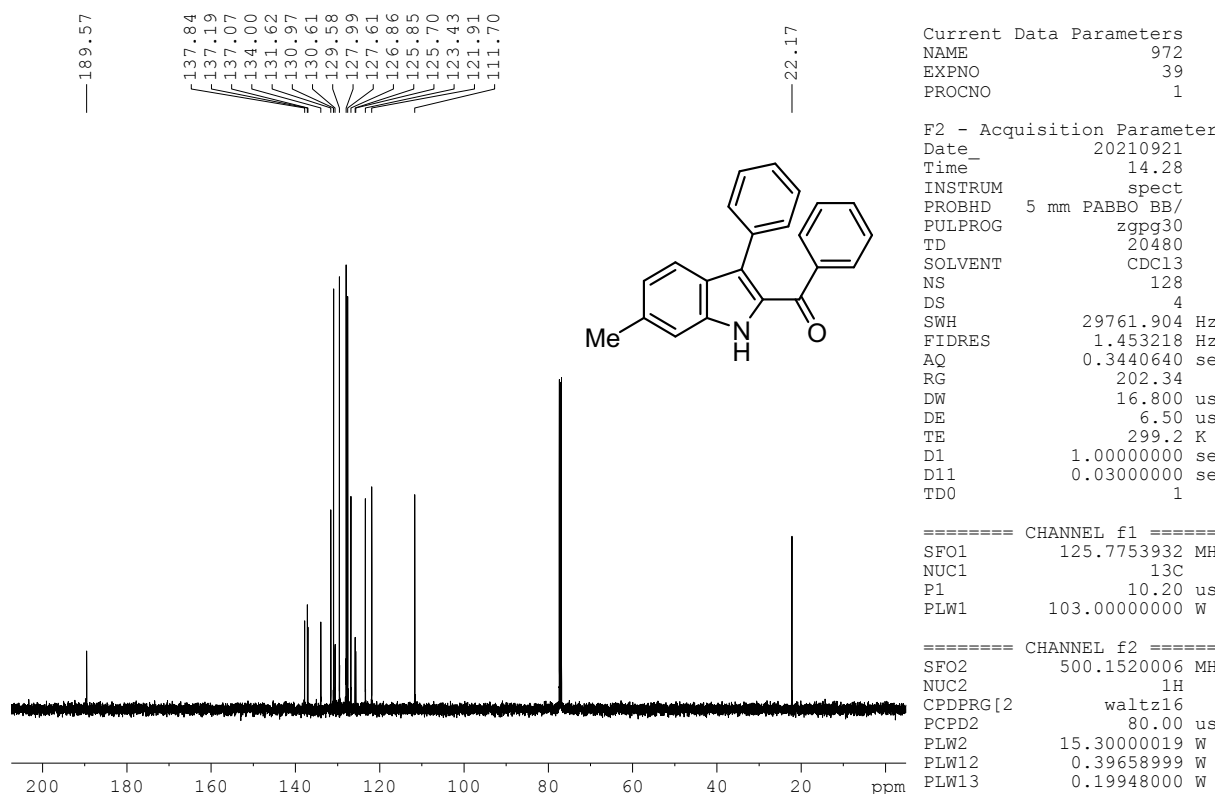

<sup>13</sup>C{<sup>1</sup>H} NMR (100 MHz, CDCl<sub>3</sub>, 24 °C) of the compound **3i**

(5-chloro-3-phenyl-1H-indol-2-yl)(phenyl)methanone: **3j**

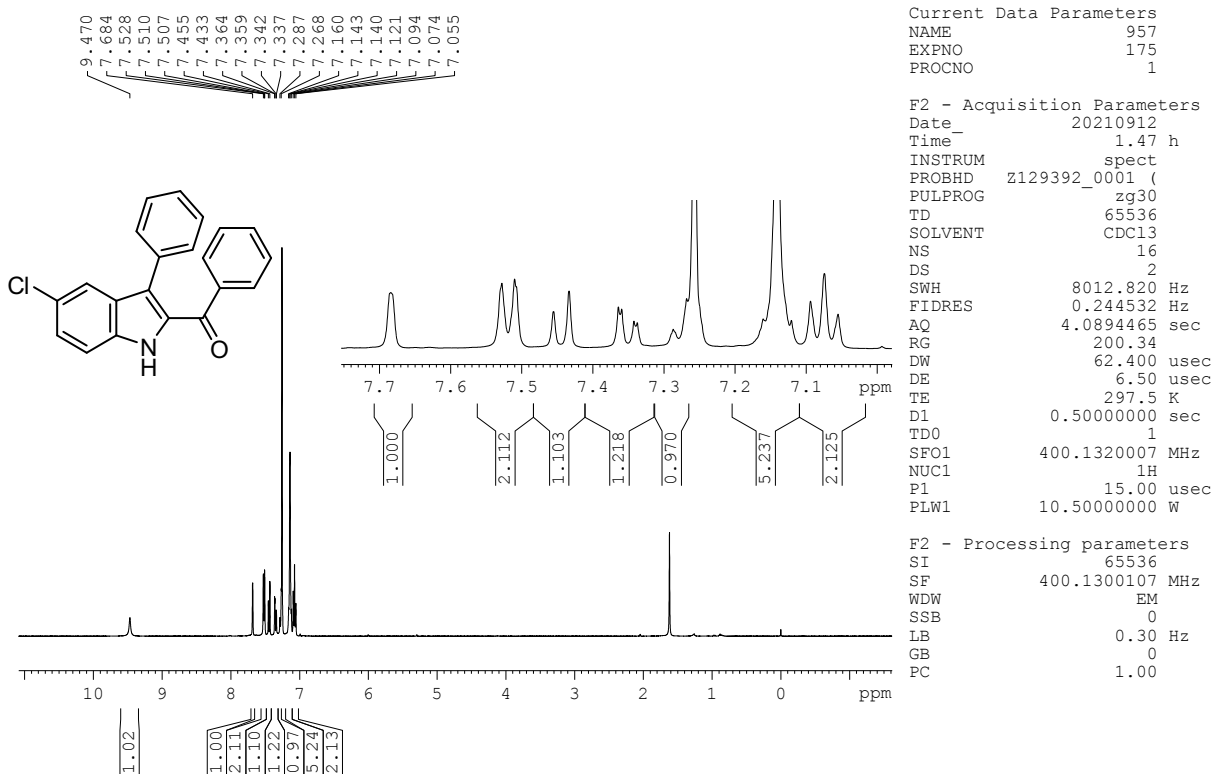

<sup>1</sup>H NMR (400 MHz, CDCl<sub>3</sub>, 24 °C) of the compound **3j**

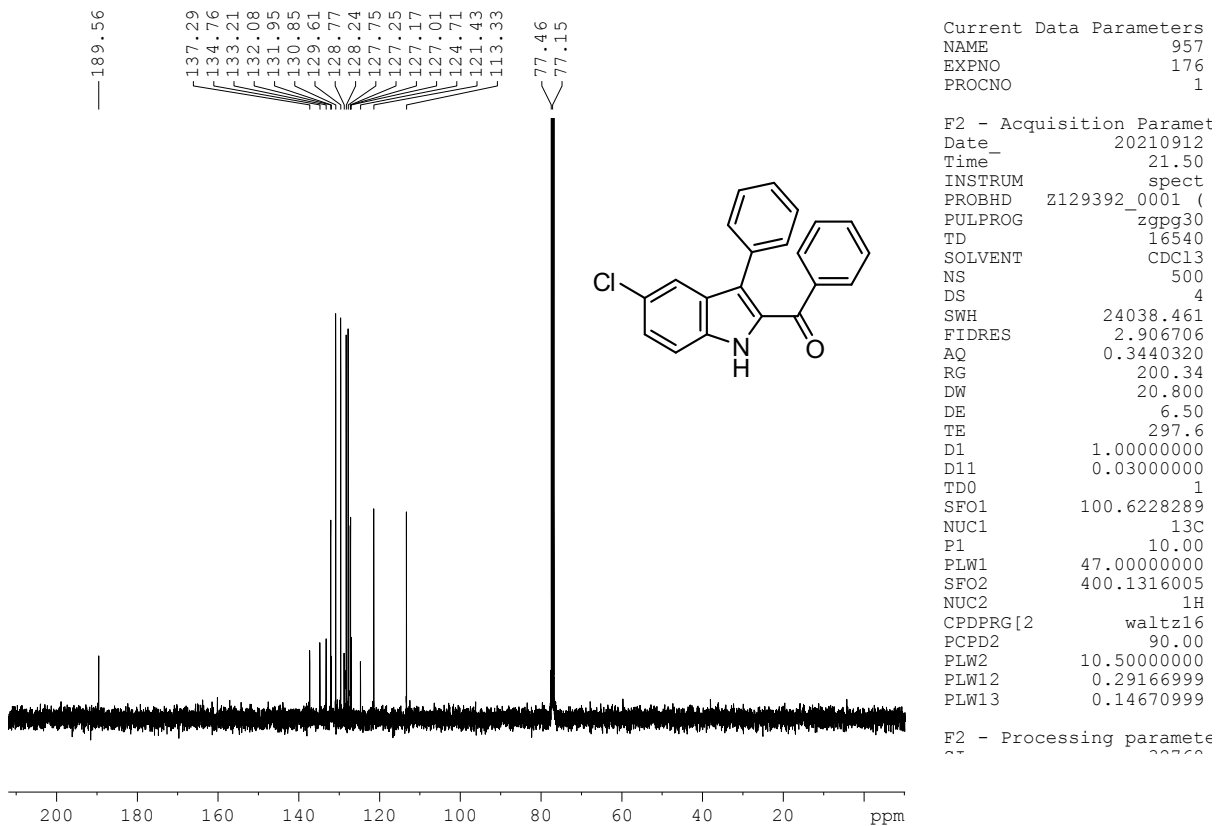

<sup>13</sup>C{<sup>1</sup>H} NMR (100 MHz, CDCl<sub>3</sub>, 24 °C) of the compound **3j**

### (3,5-diphenyl-1H-indol-2-yl)(phenyl)methanone: 3k

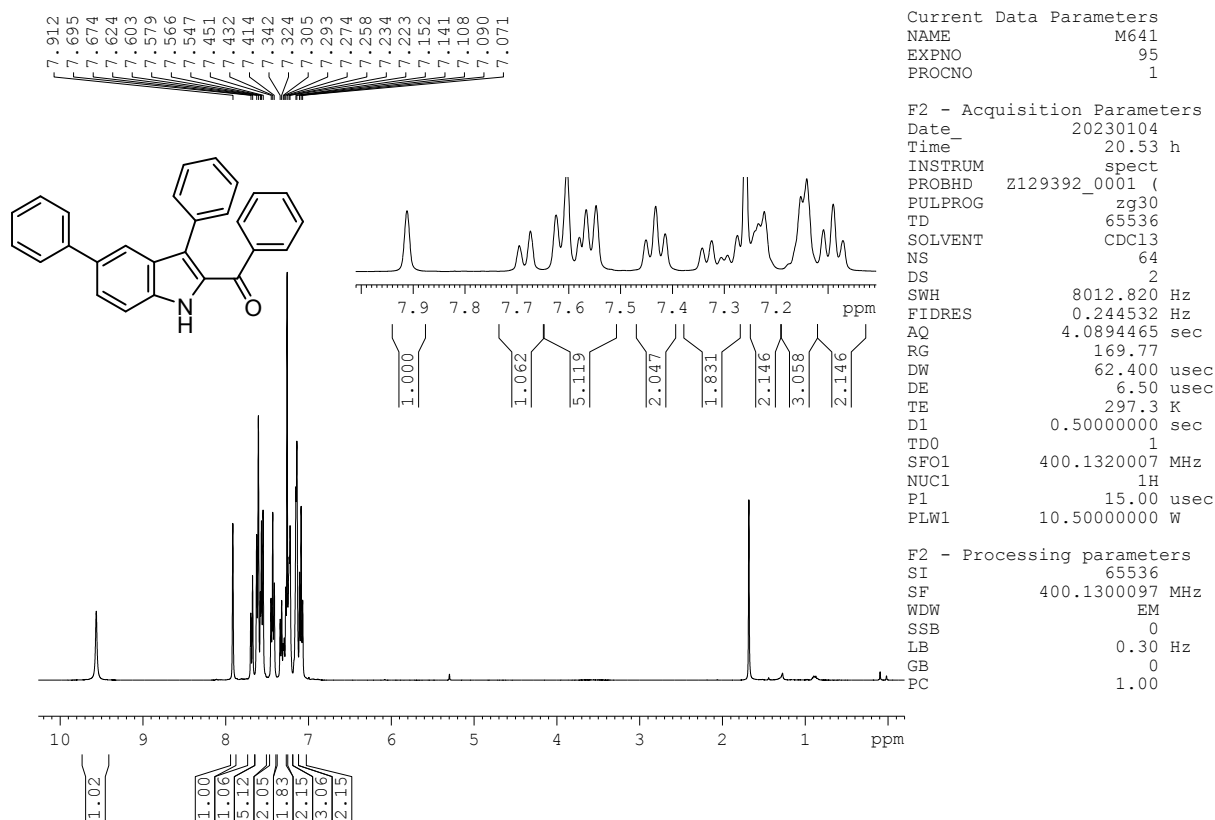

<sup>1</sup>H NMR (400 MHz, CDCl<sub>3</sub>, 24 °C) of the compound 3k

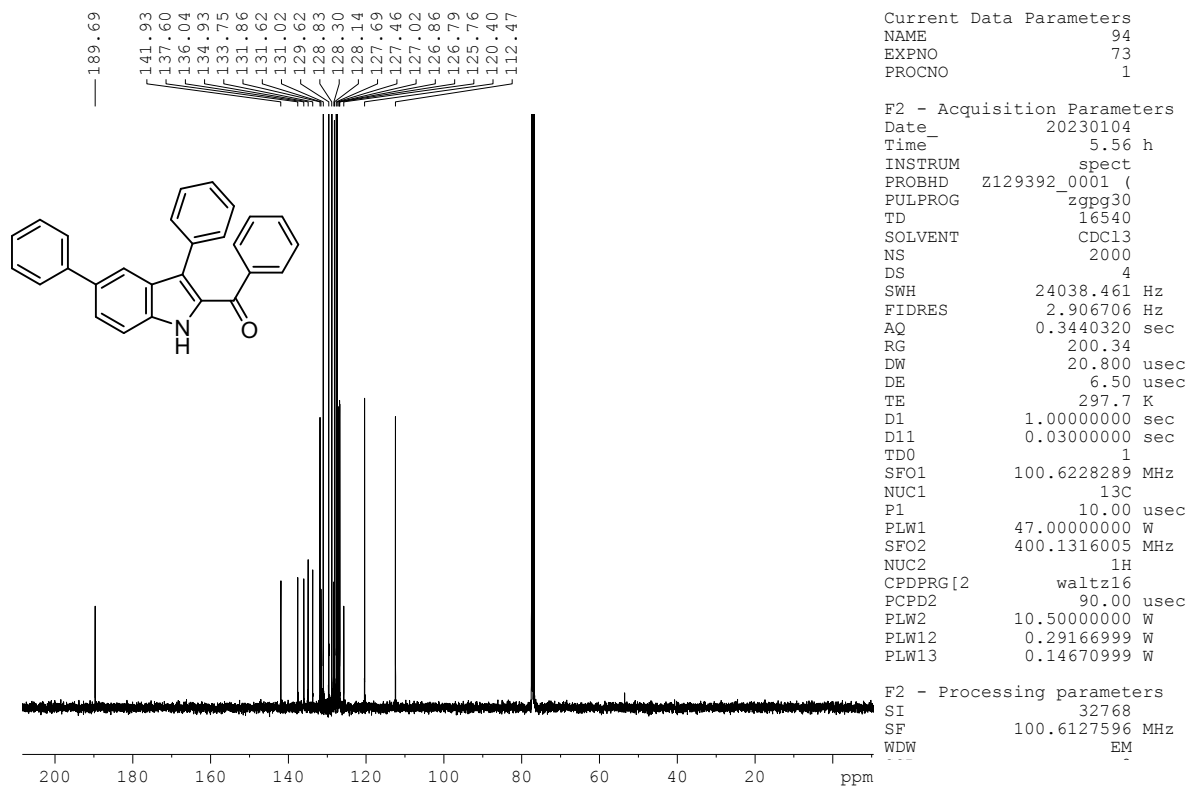

<sup>13</sup>C{<sup>1</sup>H} NMR (100 MHz, CDCl<sub>3</sub>, 24 °C) of the compound 3k

**phenyl(3-phenyl-5-(pyren-1-yl)-1H-indol-2-yl)methanone: 31**

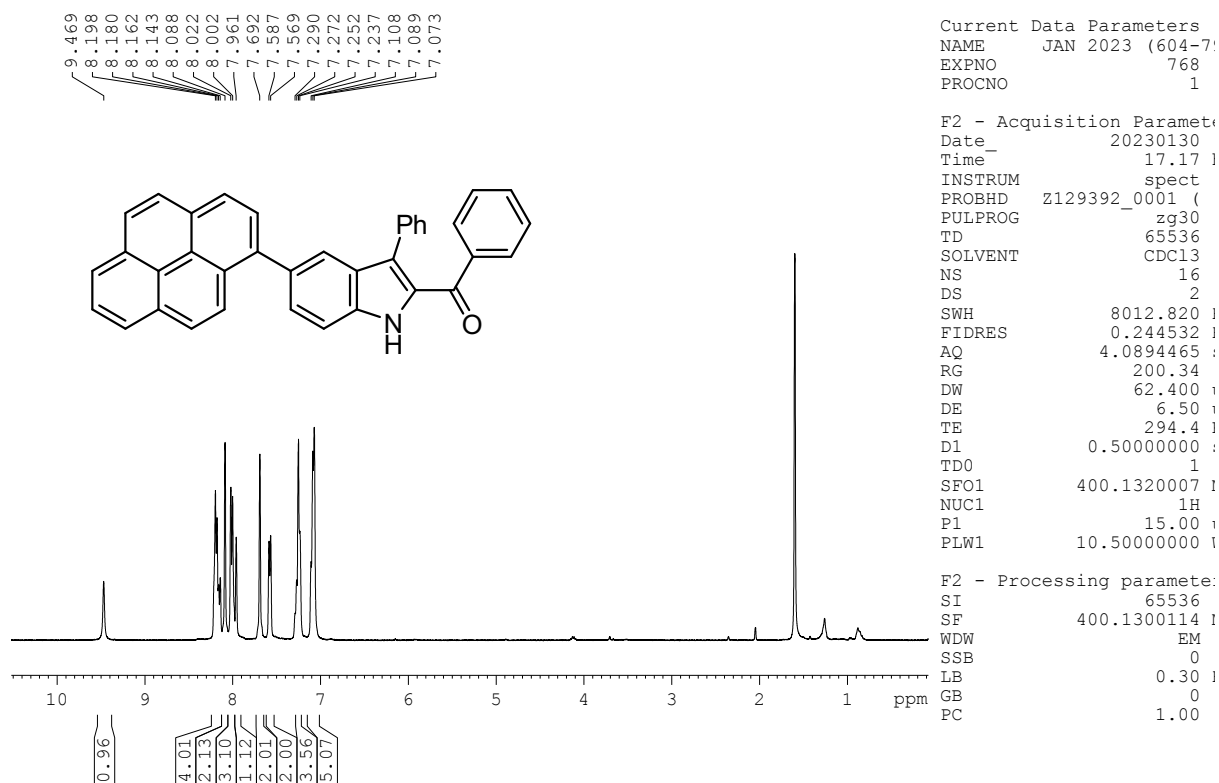

<sup>1</sup>H NMR (400 MHz, CDCl<sub>3</sub>, 24 °C) of the compound **31**

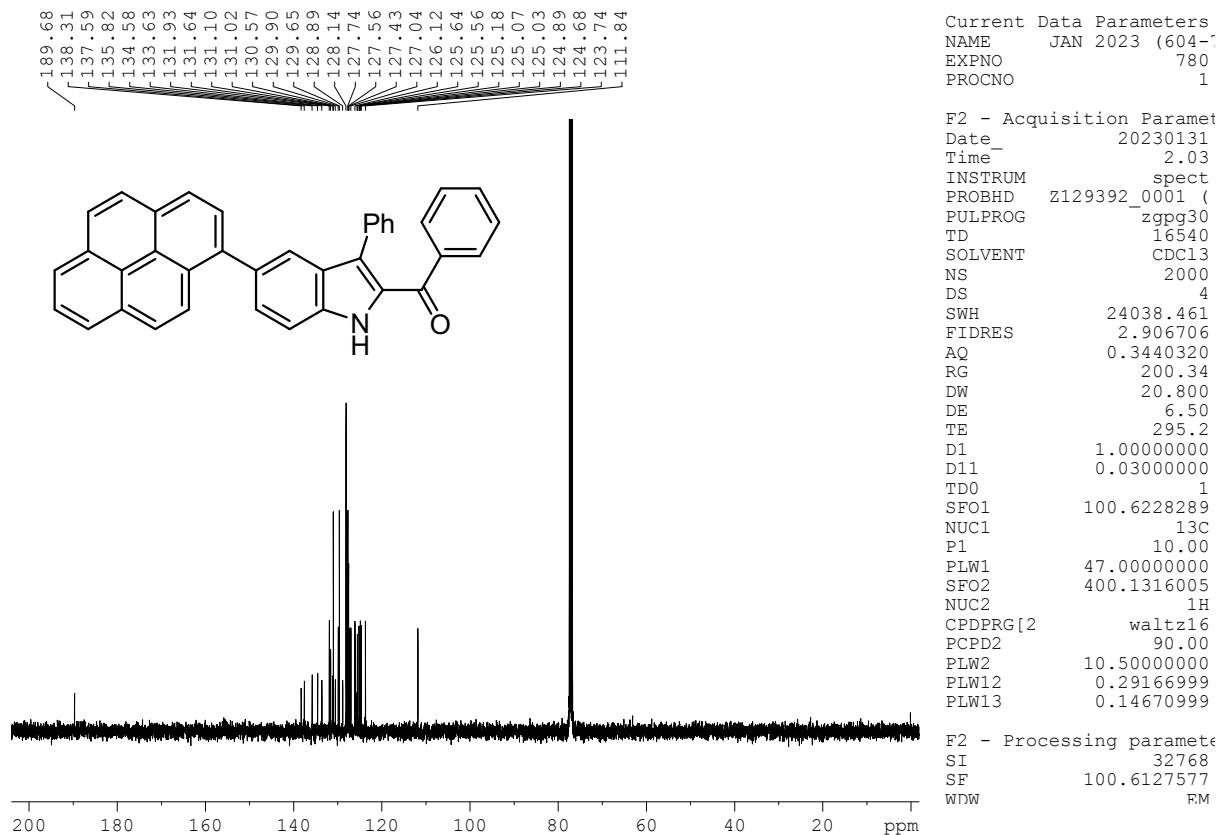

<sup>13</sup>C{<sup>1</sup>H} NMR (100 MHz, CDCl<sub>3</sub>, 24 °C) of the compound **31**

phenyl(3-phenyl-5-(pyridin-3-yl)-1H-indol-2-yl)methanone : 3m

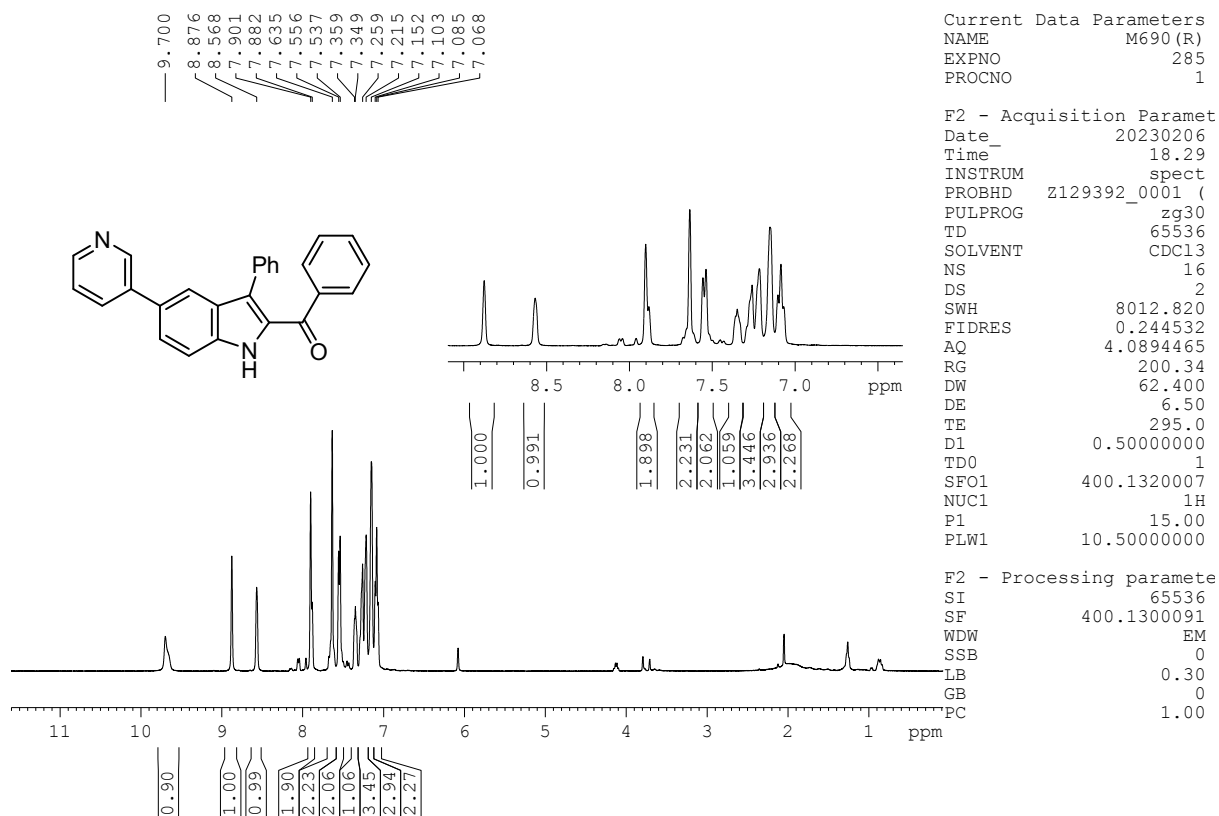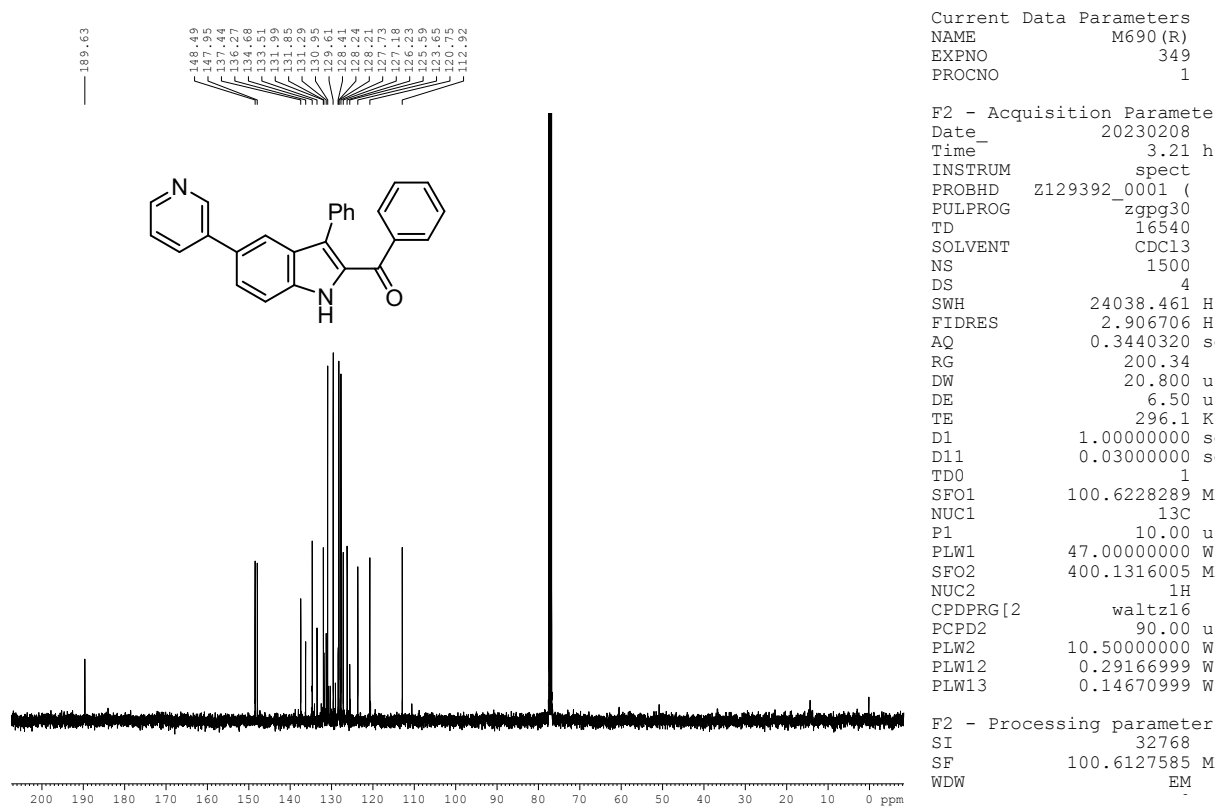



(1-methyl-3-phenyl-1H-indol-2-yl)(phenyl)methanone: **3n**

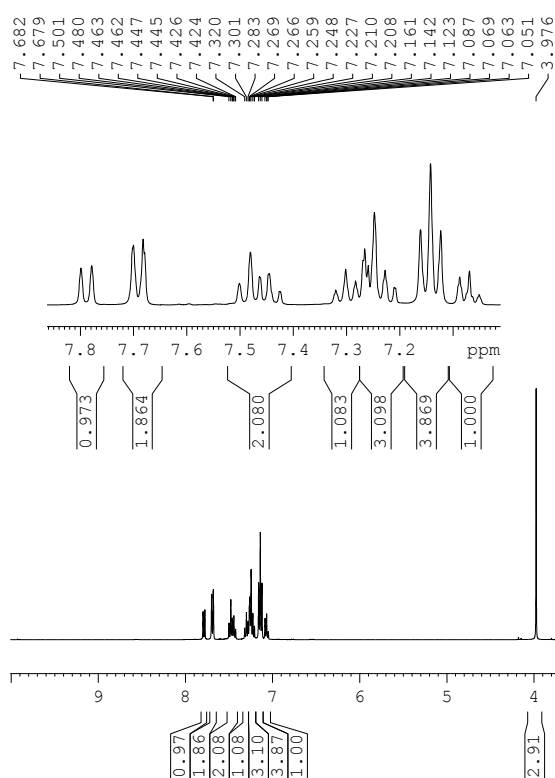

Current Data Parameters  
 NAME 977  
 EXPNO 392  
 PROCNO 1

F2 - Acquisition Parameters  
 Date\_ 20210924  
 Time 23.55 h  
 INSTRUM spect  
 PROBHD Z129392\_0001 (  
 PULPROG zg30  
 TD 65536  
 SOLVENT CDCl3  
 NS 16  
 DS 2  
 SWH 8012.820 Hz  
 FIDRES 0.244532 Hz  
 AQ 4.0894465 sec  
 RG 138.85  
 DW 62.400 usec  
 DE 6.50 usec  
 TE 297.6 K  
 D1 0.5000000 sec  
 TD0 1  
 SFO1 400.1320007 MHz  
 NUC1 1H  
 P1 15.00 usec  
 PLW1 10.5000000 W

F2 - Processing parameters  
 SI 65536  
 SF 400.1300100 MHz  
 WDW EM  
 SSB 0  
 LB 0.30 Hz  
 GB 0  
 PC 1.00

<sup>1</sup>H NMR (400 MHz, CDCl<sub>3</sub>, 24 °C) of the compound **3n**

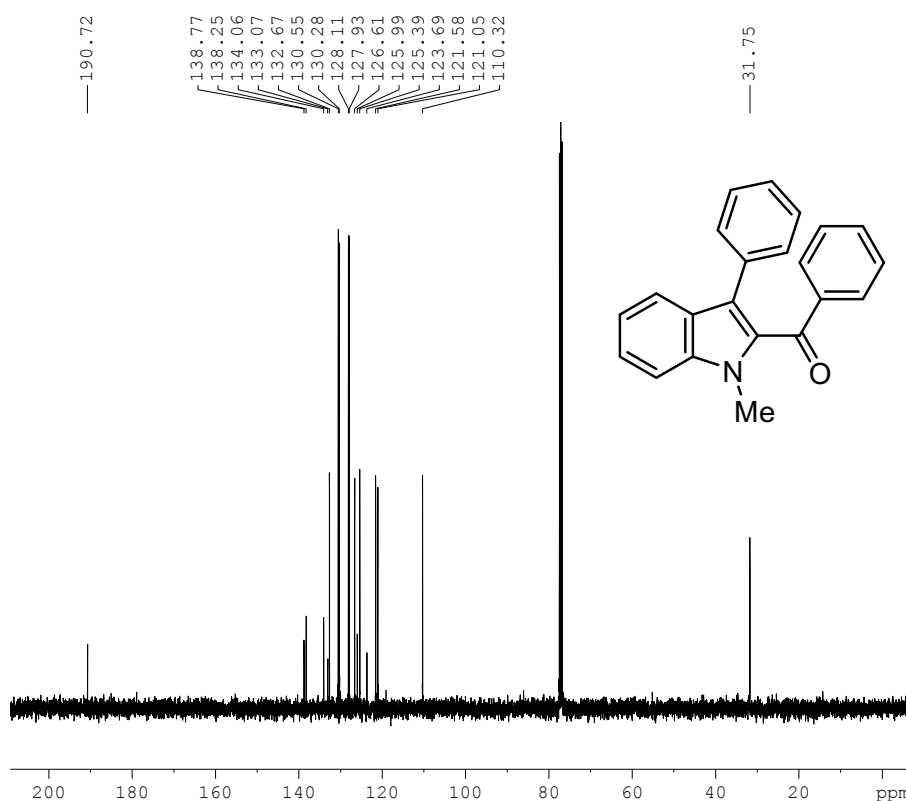

Current Data Parameters  
 NAME 977  
 EXPNO 393  
 PROCNO 1

F2 - Acquisition Parameters  
 Date\_ 20210925  
 Time 0.01 h  
 INSTRUM spect  
 PROBHD Z129392\_0001 (  
 PULPROG zgpg30  
 TD 16540  
 SOLVENT CDCl3  
 NS 184  
 DS 4  
 SWH 24038.461 MHz  
 FIDRES 2.906706 MHz  
 AQ 0.3440320 sec  
 RG 200.34  
 DW 20.800 usec  
 DE 6.50 usec  
 TE 298.2 K  
 D1 1.0000000 sec  
 D11 0.03000000 sec  
 TD0 1  
 SFO1 100.6228289 MHz  
 NUC1 13C  
 P1 10.00 usec  
 PLW1 47.00000000 W  
 SFO2 400.1316005 MHz  
 NUC2 1H  
 CPDPRG[2] waltz16  
 PCPD2 90.00 usec  
 PLW2 10.50000000 W  
 PLW12 0.29166999 W  
 PLW13 0.14670999 W

F2 - Processing parameters  
 SI 32768  
 SF 100.6127591 MHz  
 WDW EM  
 ---

<sup>13</sup>C{<sup>1</sup>H} NMR (100 MHz, CDCl<sub>3</sub>, 24 °C) of the compound **3n**

(1-allyl-3-phenyl-1H-indol-2-yl)(phenyl)methanone: **3o**

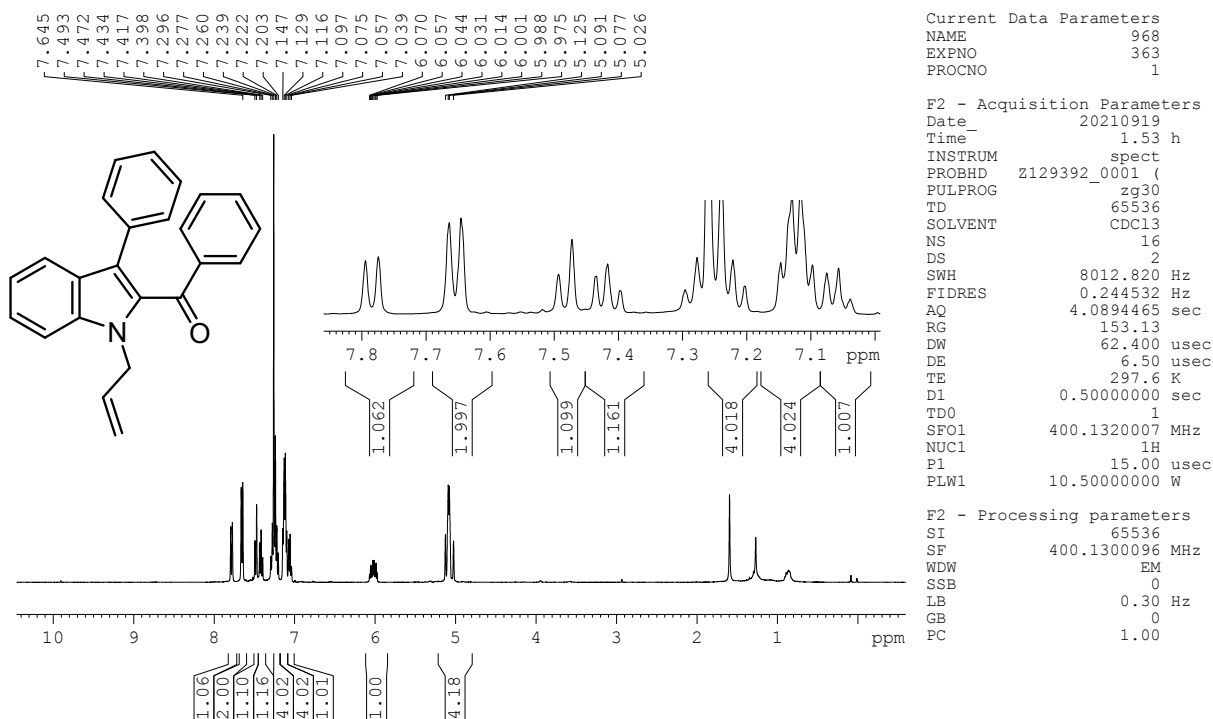

<sup>1</sup>H NMR (400 MHz, CDCl<sub>3</sub>, 24 °C) of the compound **3o**

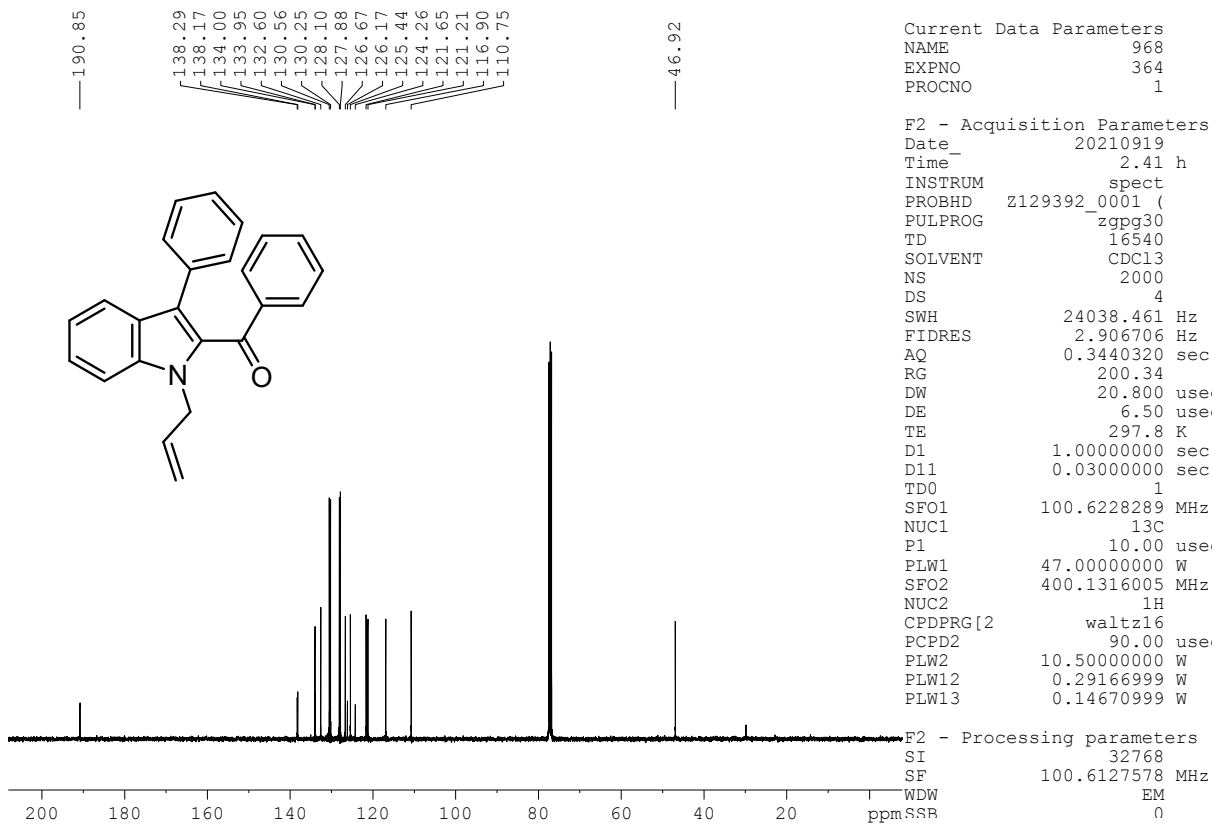

<sup>13</sup>C{<sup>1</sup>H} NMR (100 MHz, CDCl<sub>3</sub>, 24 °C) of the compound **3o**

### (4-methoxyphenyl)(3-phenyl-1H-indol-2-yl)methanone: 3p

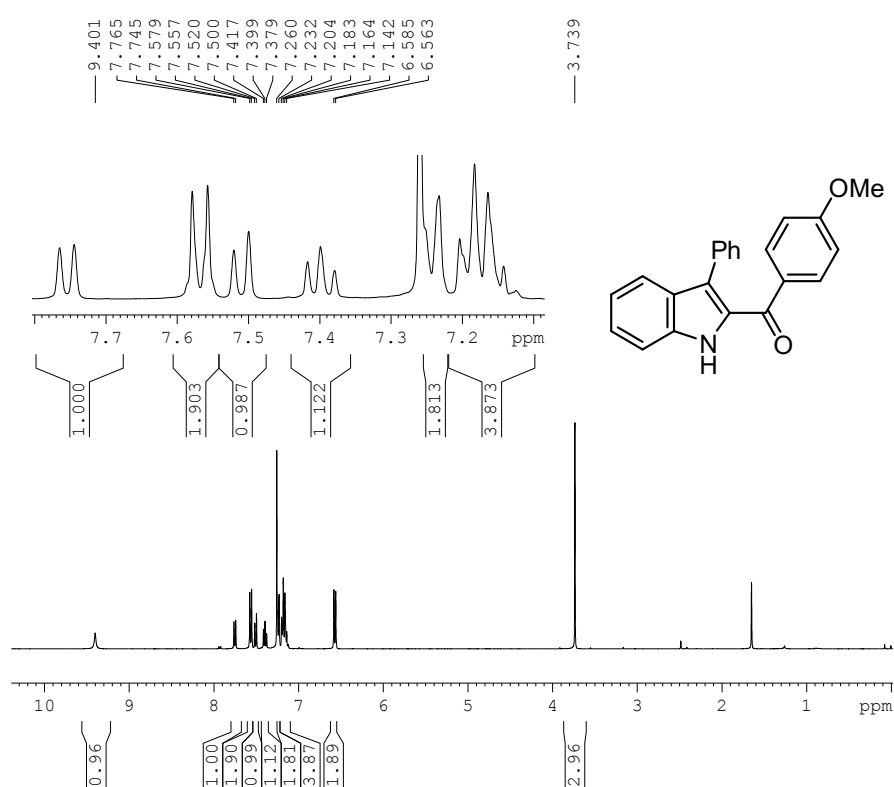

<sup>1</sup>H NMR (400 MHz, CDCl<sub>3</sub>, 24 °C) of the compound 3p

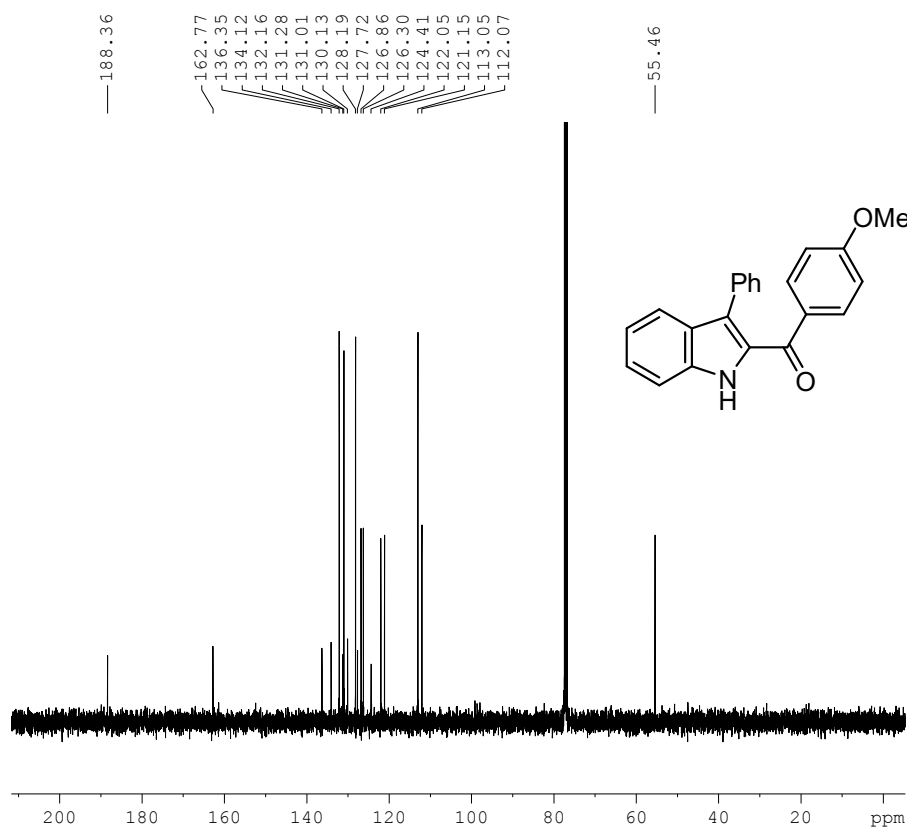

<sup>13</sup>C{<sup>1</sup>H} NMR (100 MHz, CDCl<sub>3</sub>, 24 °C) of the compound 3p

(2-methoxyphenyl)(3-phenyl-1H-indol-2-yl)methanone: **3q**

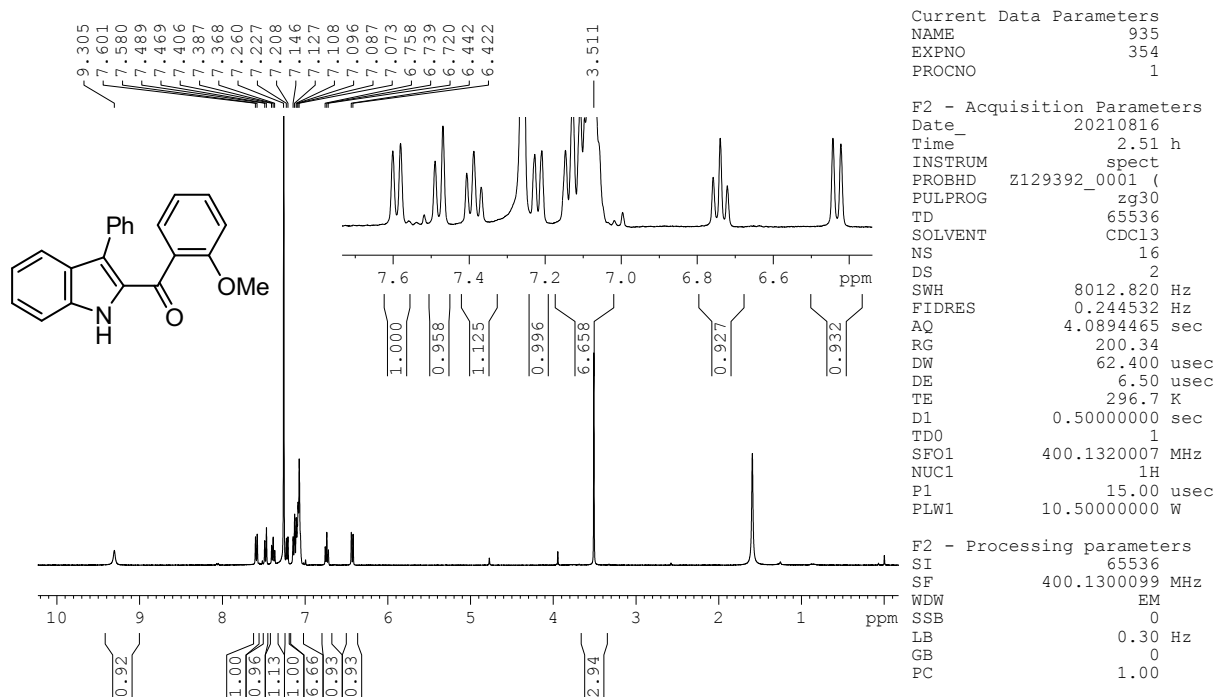

$^1\text{H}$  NMR (400 MHz,  $\text{CDCl}_3$ , 24 °C) of the compound **3q**

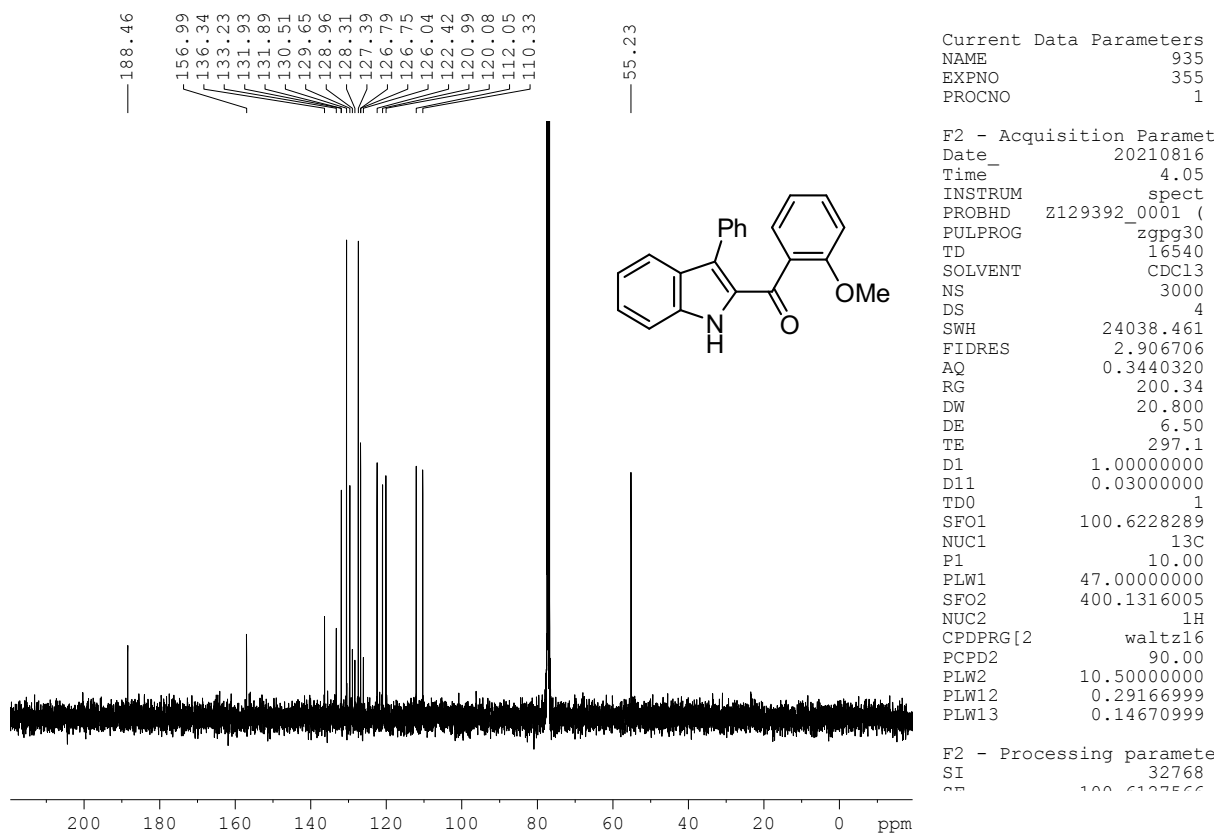

$^{13}\text{C}\{^1\text{H}\}$  NMR (100 MHz,  $\text{CDCl}_3$ , 24 °C) of the compound **3q**

### (4-fluorophenyl)(3-phenyl-1H-indol-2-yl)methanone: 3r

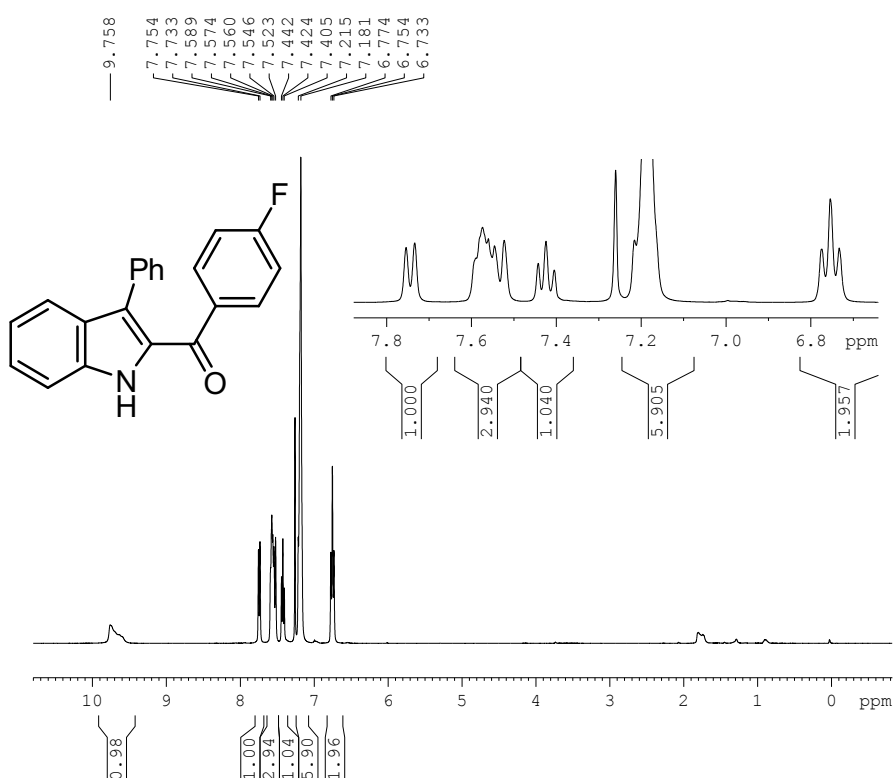

Current Data Parameters  
NAME M649  
EXPNO 143  
PROCNO 1

F2 - Acquisition Parameters  
Date\_ 20230105  
Time\_ 22.19 h  
INSTRUM spect  
PROBHD Z129392\_0001 (  
PULPROG zg30  
TD 65536  
SOLVENT CDCl3  
NS 16  
DS 2  
SWH 8012.820 Hz  
FIDRES 0.244532 Hz  
AQ 4.0894465 sec  
RG 138.85  
DW 62.400 usec  
DE 6.50 usec  
TE 297.1 K  
D1 0.50000000 sec  
TD0 1  
SFO1 400.1320007 MHz  
NUC1 1H  
P1 15.00 usec  
PLW1 10.50000000 W

F2 - Processing parameters  
SI 65536  
SF 400.1300094 MHz  
WDW EM  
SSB 0  
LB 0.30 Hz  
GB 0  
PC 1.00

### <sup>1</sup>H NMR (400 MHz, CDCl<sub>3</sub>, 24 °C) of the compound 3r

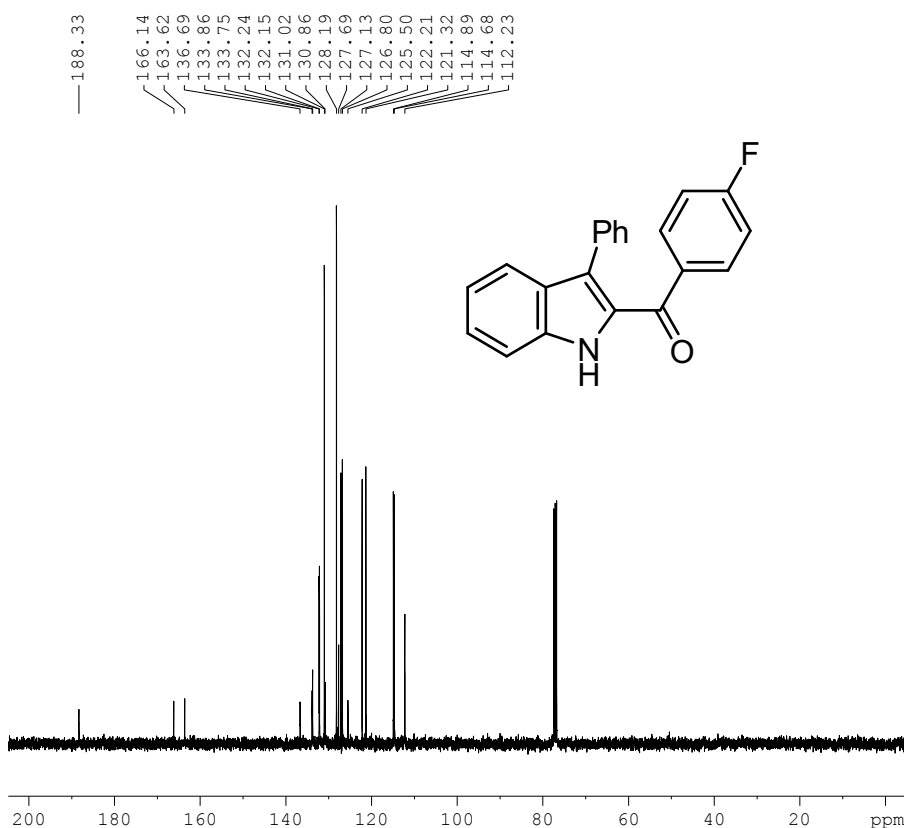

Current Data Parameters  
NAME M649  
EXPNO 144  
PROCNO 1

F2 - Acquisition Parameters  
Date\_ 20230105  
Time\_ 22.26 h  
INSTRUM spect  
PROBHD Z129392\_0001 (  
PULPROG zgpg30  
TD 16540  
SOLVENT CDCl3  
NS 256  
DS 4  
SWH 24038.461 H  
FIDRES 2.906706 H  
AQ 0.3440320 s  
RG 200.34  
DW 20.800 u  
DE 6.50 u  
TE 297.3 K  
D1 1.00000000 s  
D11 0.03000000 s  
TD0 1  
SFO1 100.6228289 M  
NUC1 13C  
P1 10.00 u  
PLW1 47.00000000 W  
SFO2 400.1316005 M  
NUC2 1H  
CPDPRG[2] waltz16  
PCPD2 90.00 u  
PLW2 10.50000000 W  
PLW12 0.29166999 W  
PLW13 0.14670999 W

F2 - Processing parameter  
ST 32768

### <sup>13</sup>C{<sup>1</sup>H} NMR (100 MHz, CDCl<sub>3</sub>, 24 °C) of the compound 3r

### (3-phenyl-1H-indol-2-yl)(4-(trifluoromethyl)phenyl)methanone: 3s

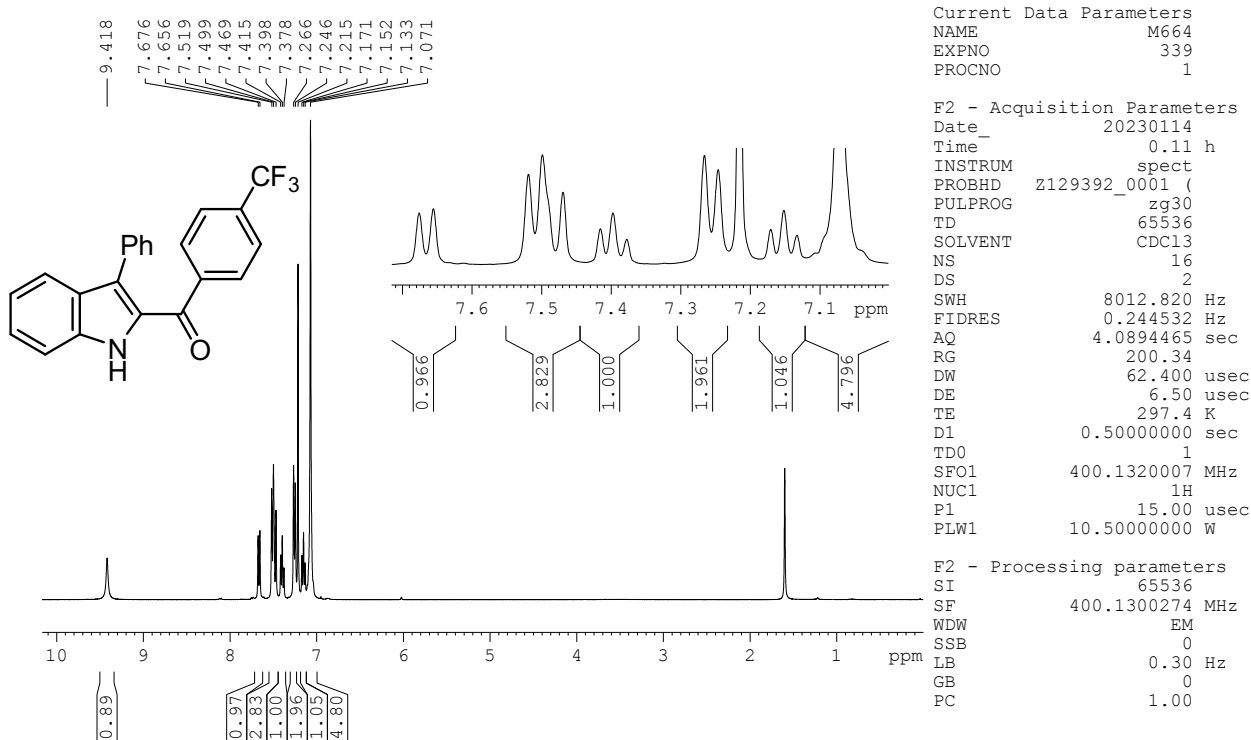

<sup>1</sup>H NMR (400 MHz, CDCl<sub>3</sub>, 24 °C) of the compound 3s

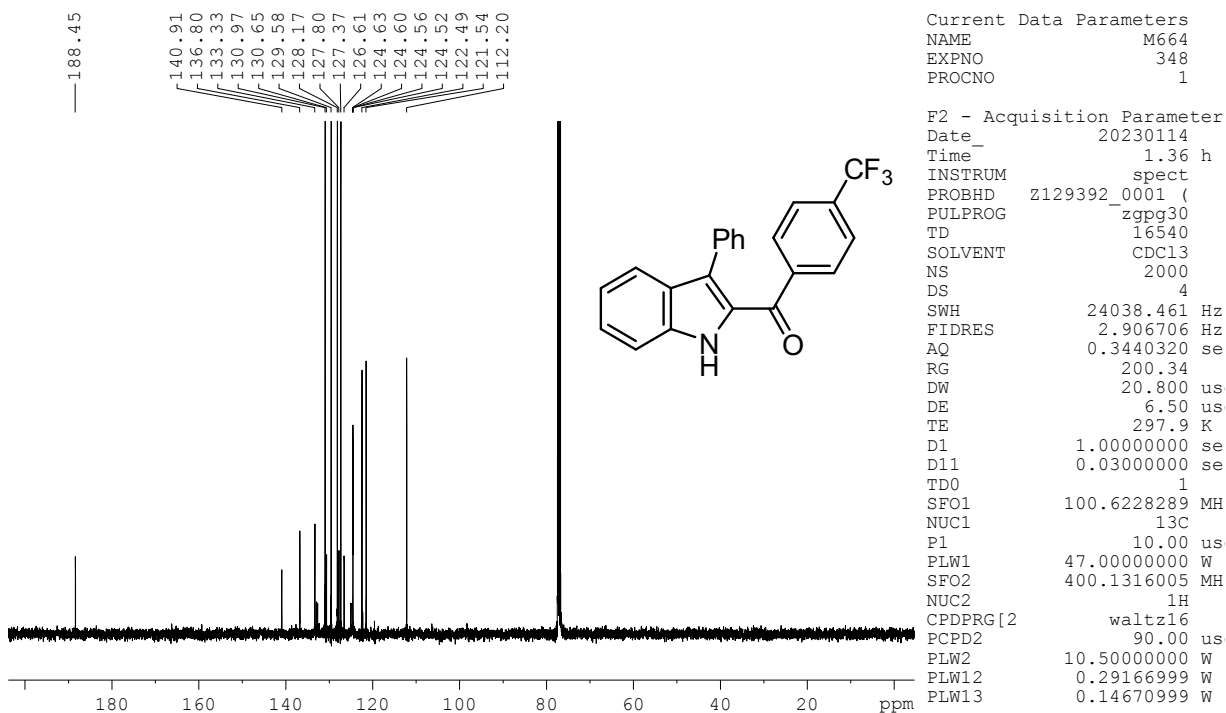

<sup>13</sup>C{<sup>1</sup>H} NMR (100 MHz, CDCl<sub>3</sub>, 24 °C) of the compound 3s

(4-nitrophenyl)(3-phenyl-1H-indol-2-yl)methanone: **3t**

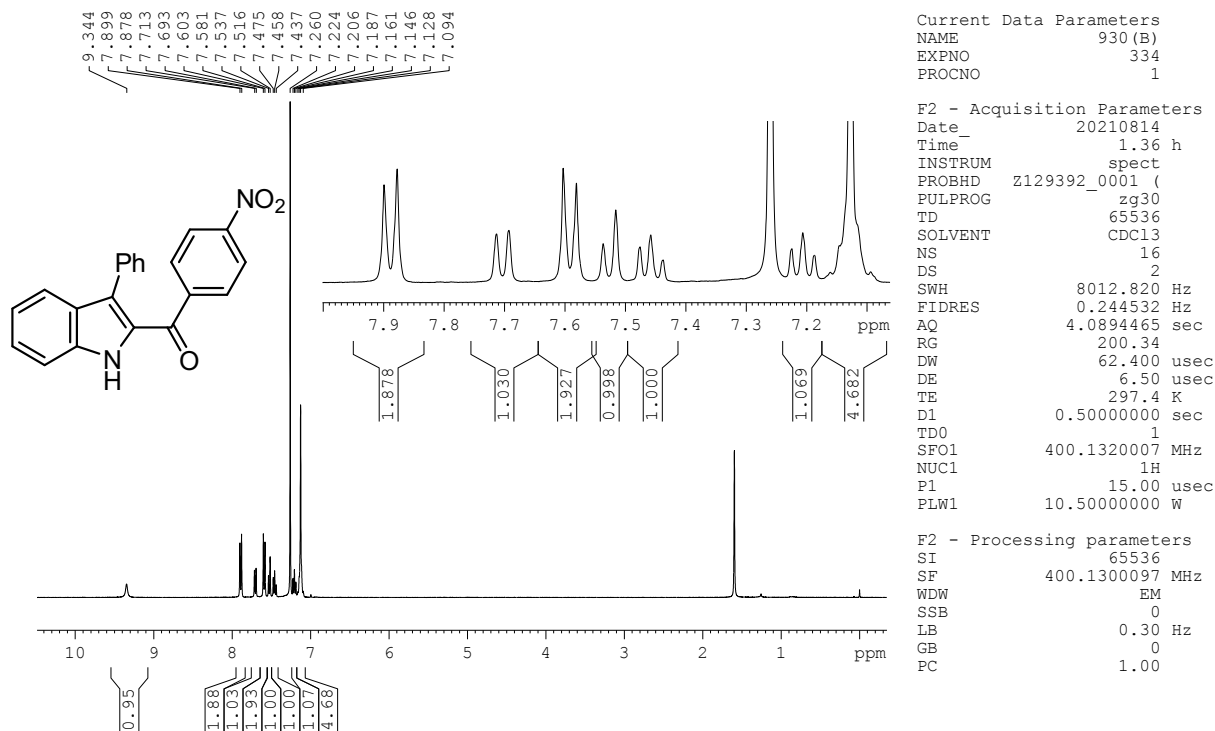

<sup>1</sup>H NMR (400 MHz, CDCl<sub>3</sub>, 24 °C) of the compound **3t**

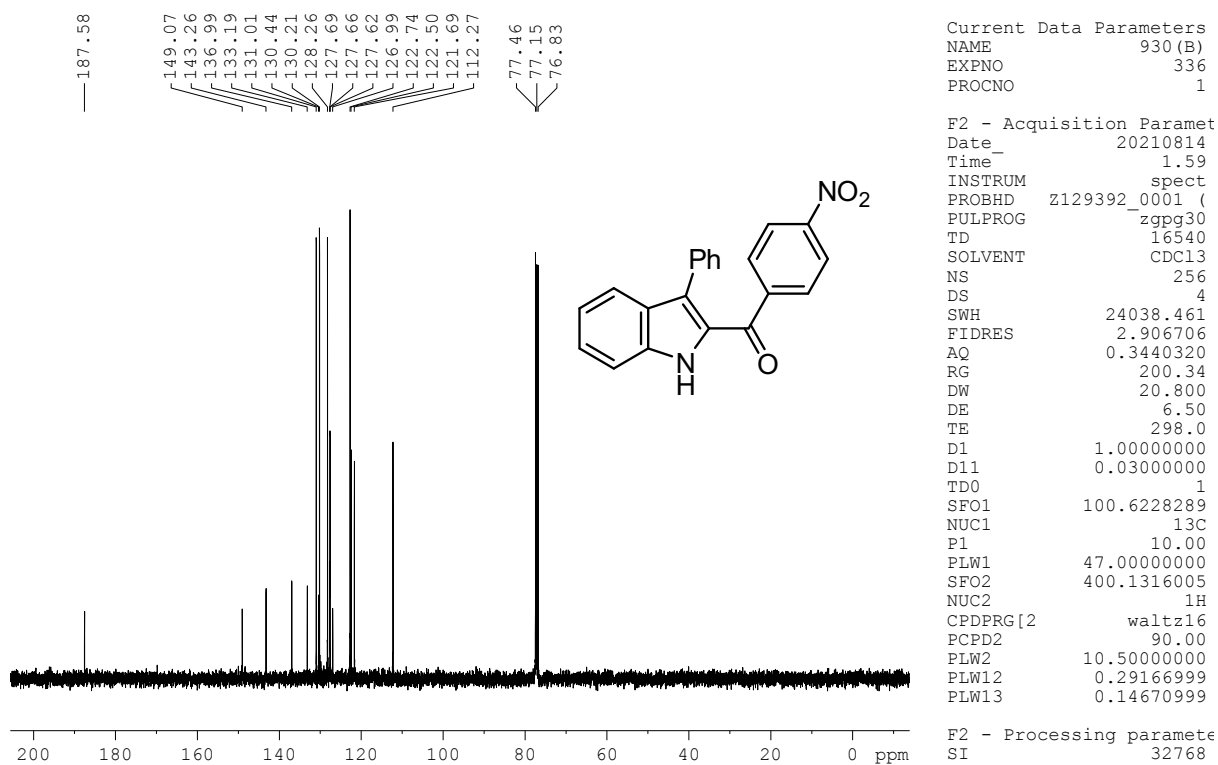

<sup>13</sup>C{<sup>1</sup>H} NMR (100 MHz, CDCl<sub>3</sub>, 24 °C) of the compound **3t**

**furan-2-yl(3-phenyl-1H-indol-2-yl)methanone: 3u**

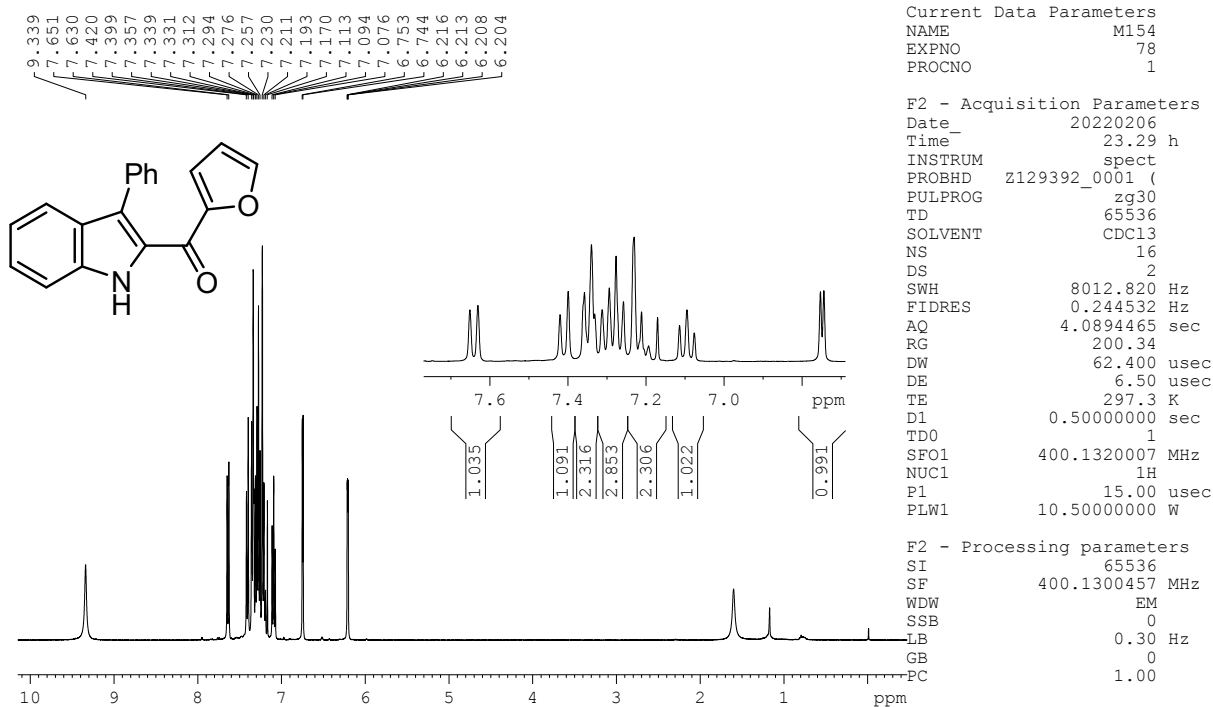

**<sup>1</sup>H NMR (400 MHz, CDCl<sub>3</sub>, 24 °C) of the compound 3u**

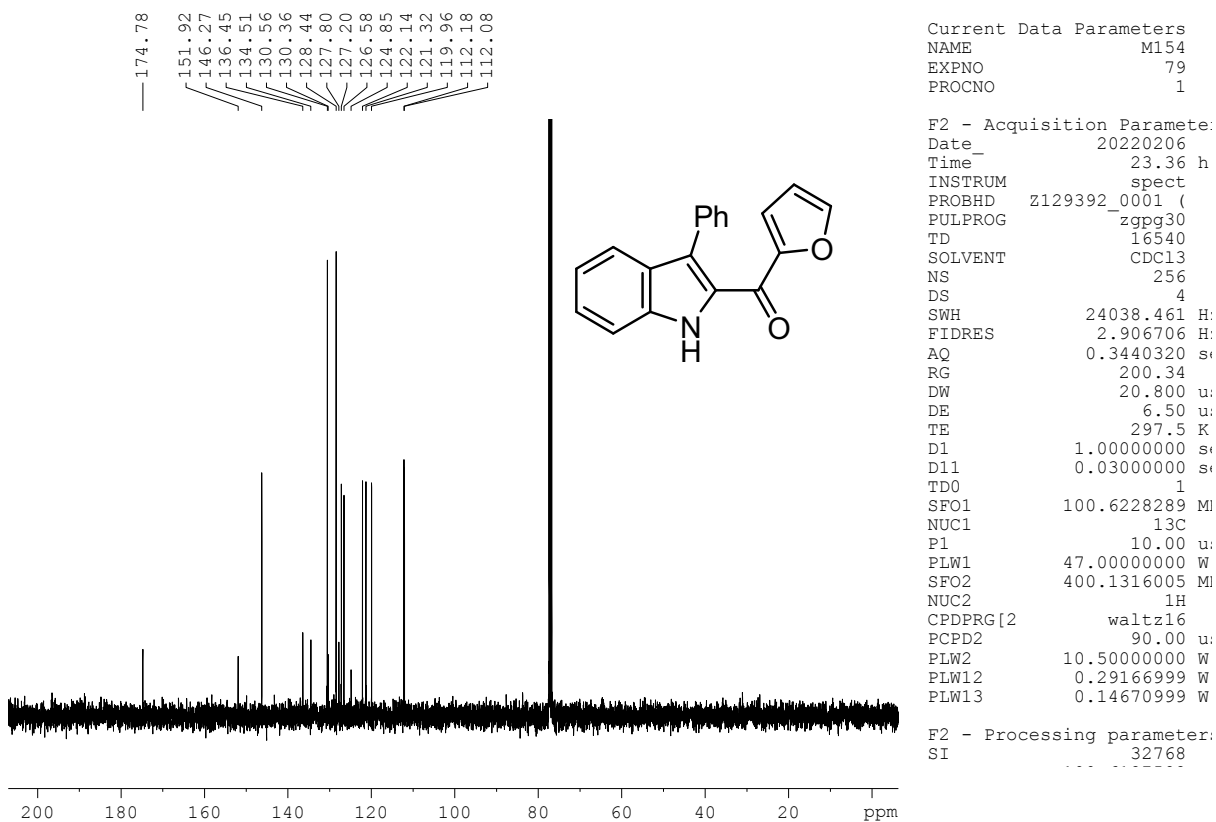

**<sup>13</sup>C{<sup>1</sup>H} NMR (100 MHz, CDCl<sub>3</sub>, 24 °C) of the compound 3u**



## 2-phenyl-1-(3-phenyl-1H-indol-2-yl)ethan-1-one:3v

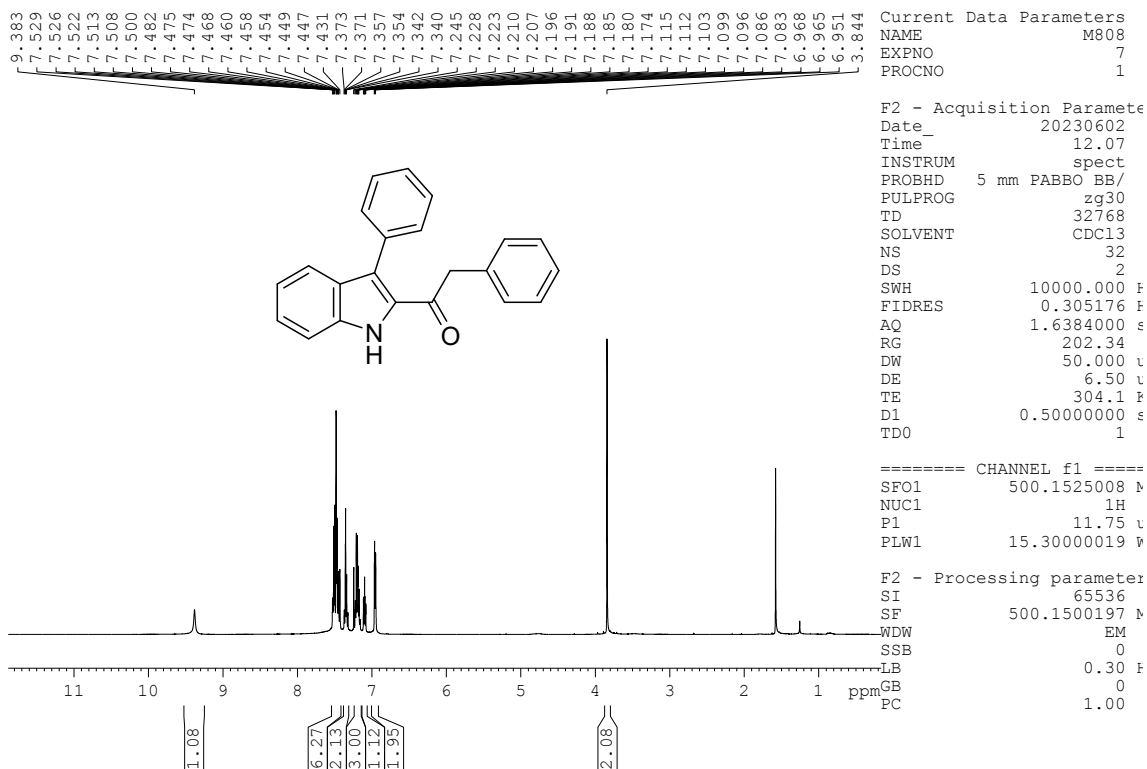

<sup>1</sup>H NMR (500 MHz, CDCl<sub>3</sub>, 24 °C) of the compound **3v**

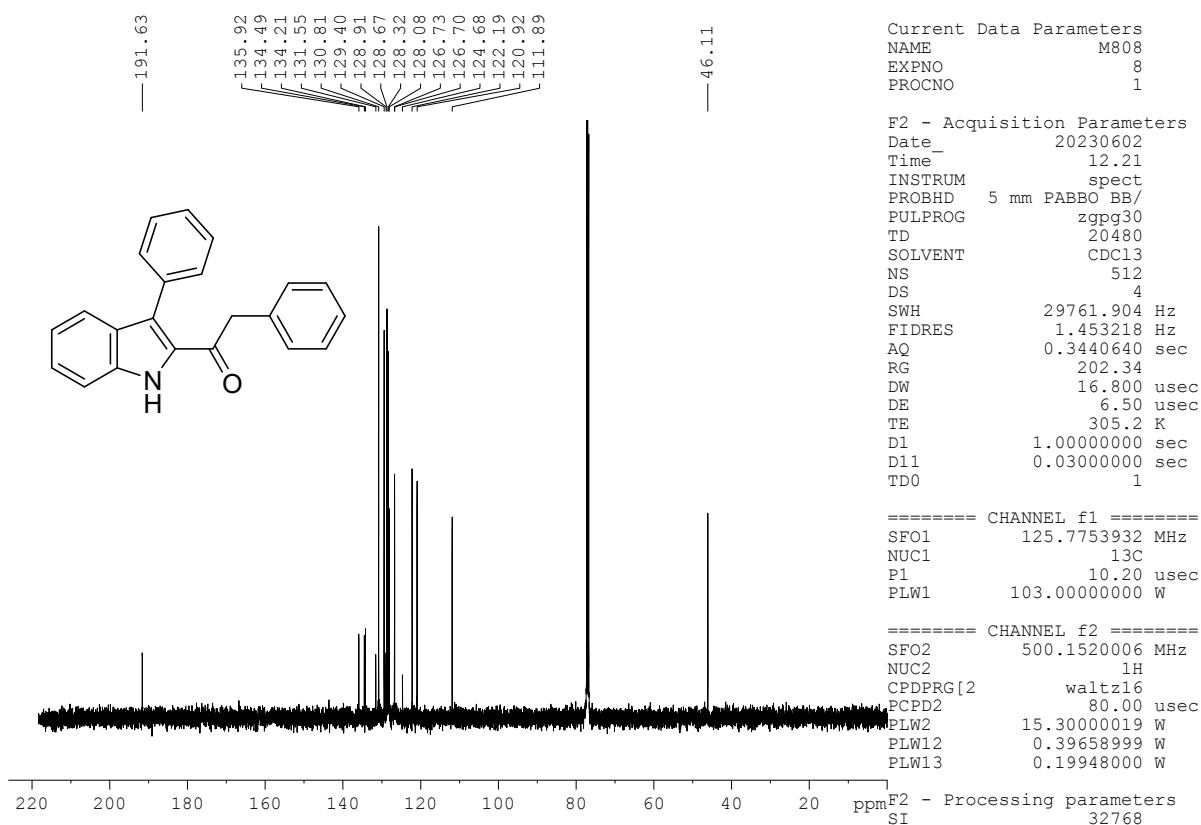

<sup>13</sup>C{<sup>1</sup>H} NMR (125 MHz, CDCl<sub>3</sub>, 24 °C) of the compound **3v**

### 1-(3-phenyl-1H-indol-2-yl)hexan-1-one: 3w

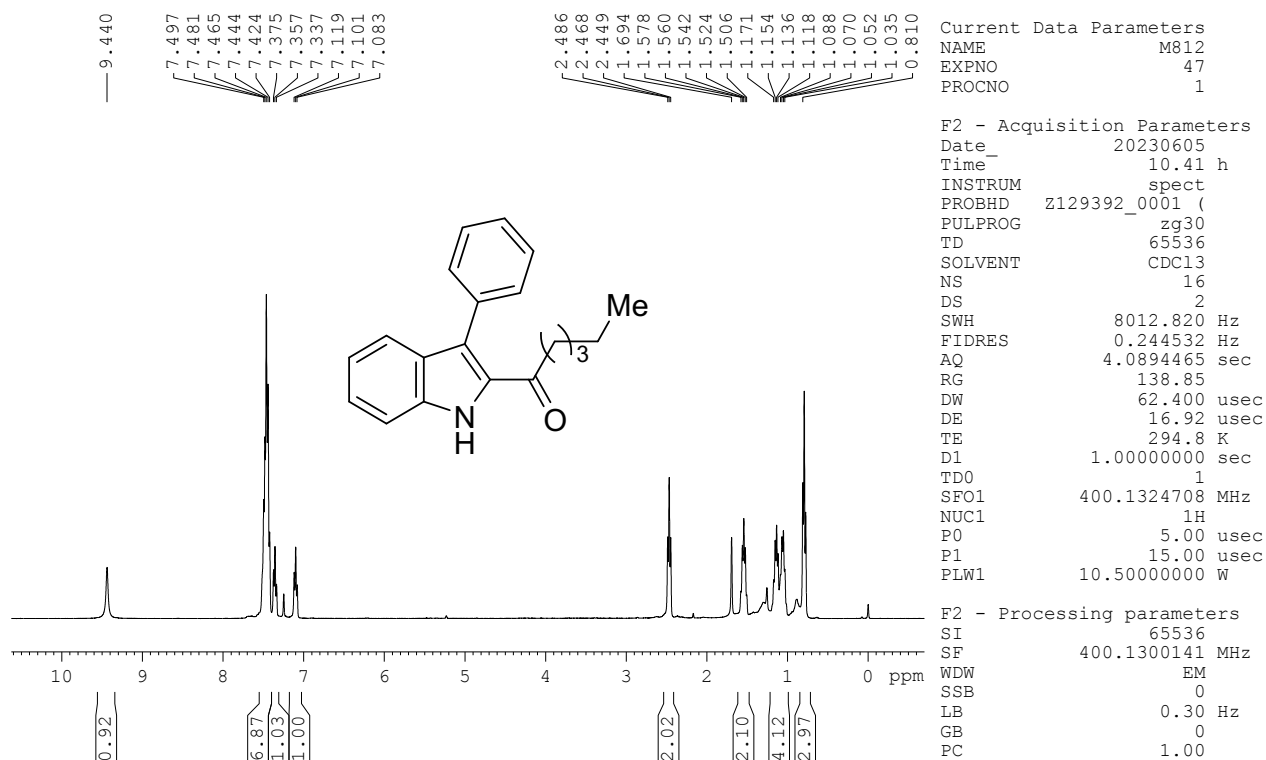

<sup>1</sup>H NMR (400 MHz, CDCl<sub>3</sub>, 24 °C) of the compound 3w

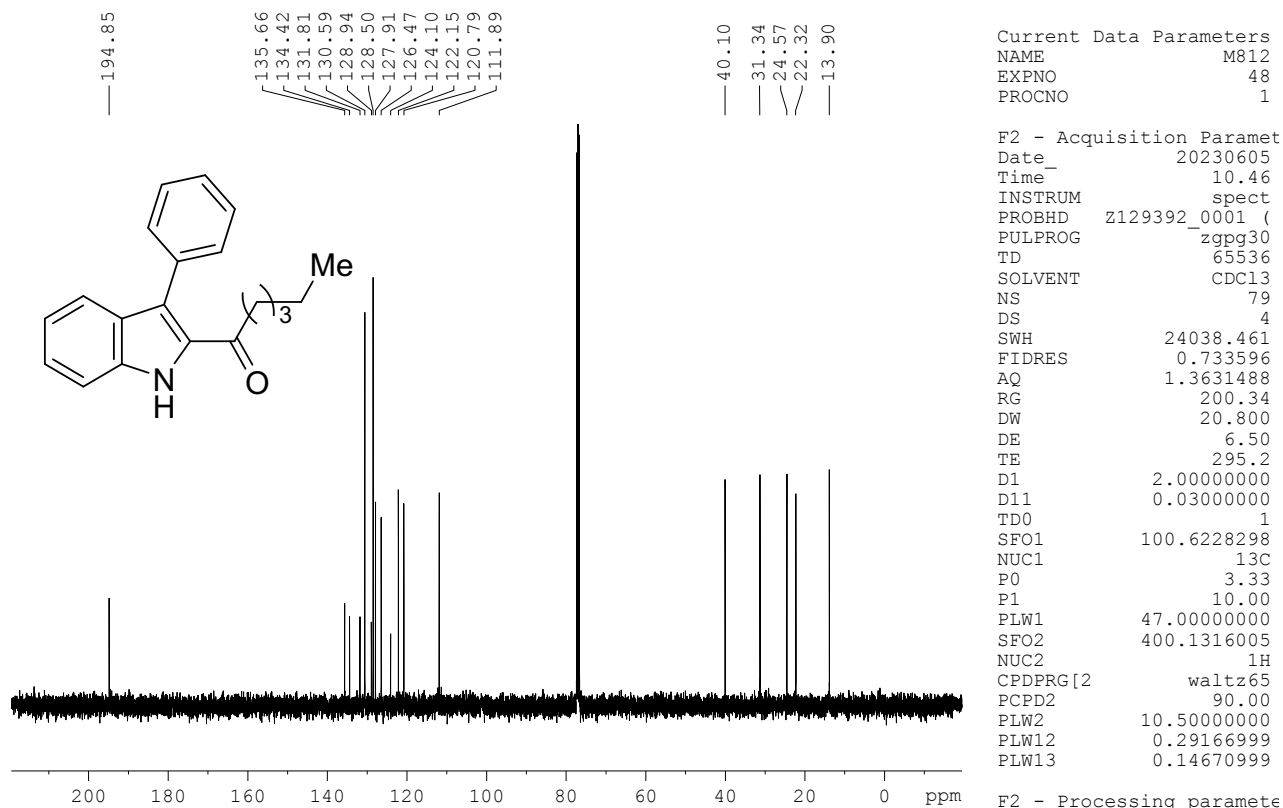

<sup>13</sup>C{<sup>1</sup>H} NMR (100 MHz, CDCl<sub>3</sub>, 24 °C) of the compound 3w

## 2-((2-acetylphenyl)amino)-1,2-diphenylethan-1-one: 5

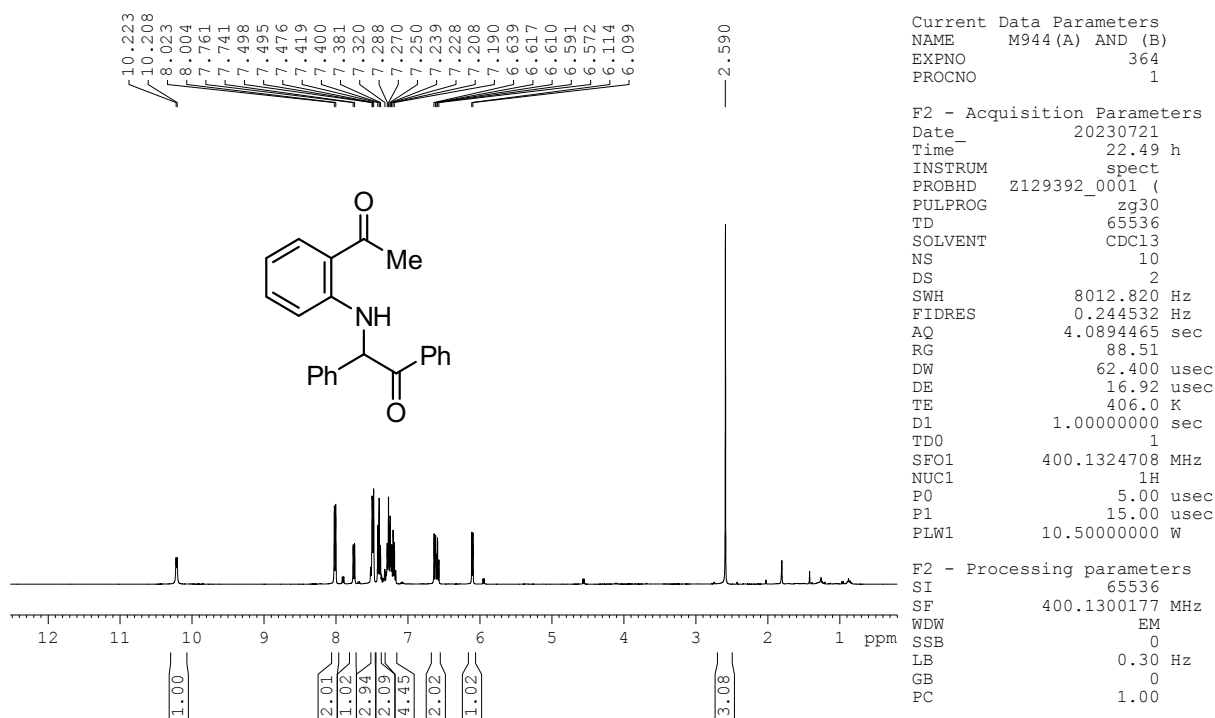

<sup>1</sup>H NMR (400 MHz, CDCl<sub>3</sub>, 24 °C) of the compound 5

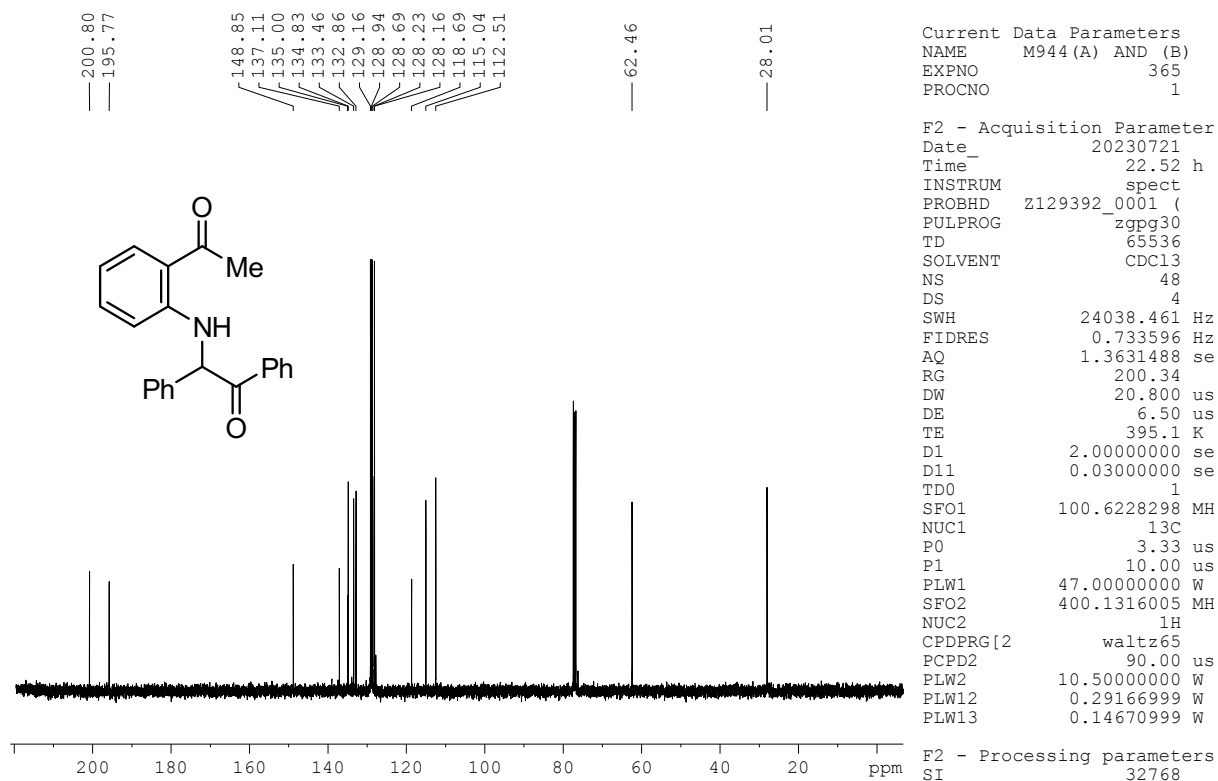

<sup>13</sup>C NMR (400 MHz, CDCl<sub>3</sub>, 24 °C) of the compound 5

### 4-bromo-2-((2-oxo-1,2-diphenylethyl)amino)benzaldehyde: 5'

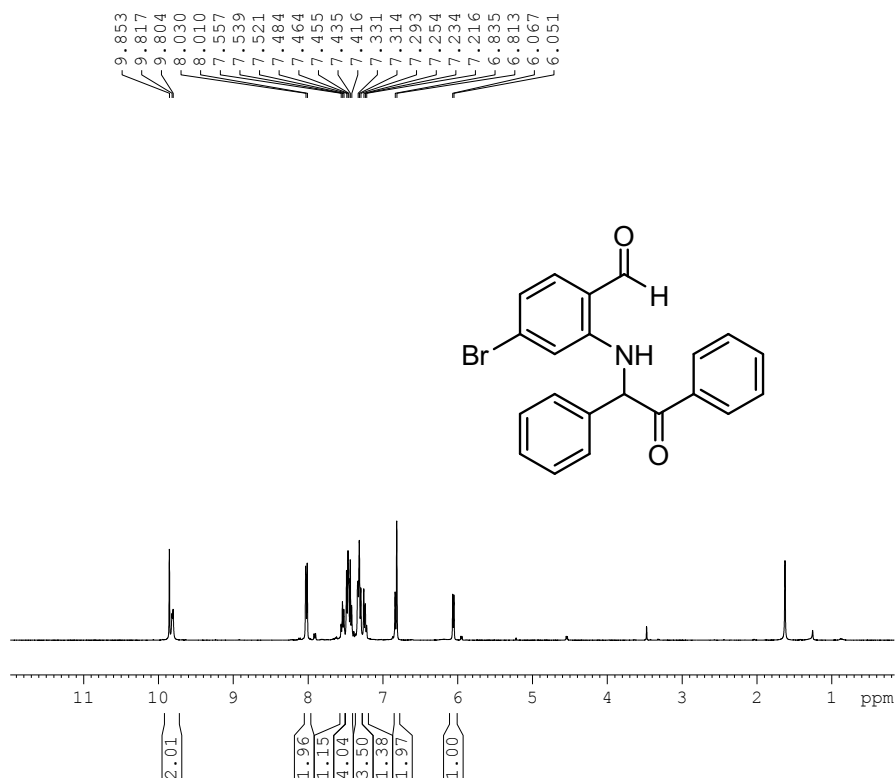

Current Data Parameters  
 NAME MM101(2)  
 EXPNO 19  
 PROCNO 1

F2 - Acquisition Parameters  
 Date\_ 20231002  
 Time 20.45 h  
 INSTRUM spect  
 PROBHD Z129392\_0001 (  
 PULPROG zg30  
 TD 65536  
 SOLVENT CDCl3  
 NS 16  
 DS 2  
 SWH 8012.820 Hz  
 FIDRES 0.244532 Hz  
 AQ 4.0894465 sec  
 RG 200.34  
 DW 62.400 usec  
 DE 16.92 usec  
 TE 300.5 K  
 D1 1.00000000 sec  
 TD0 1  
 SFO1 400.1324708 MHz  
 NUC1 1H  
 P0 5.00 usec  
 P1 15.00 usec  
 PLW1 10.50000000 W

F2 - Processing parameters  
 SI 65536  
 SF 400.1300113 MHz  
 WDW EM  
 SSB 0  
 LB 0.30 Hz  
 GB 0  
 PC 1.00

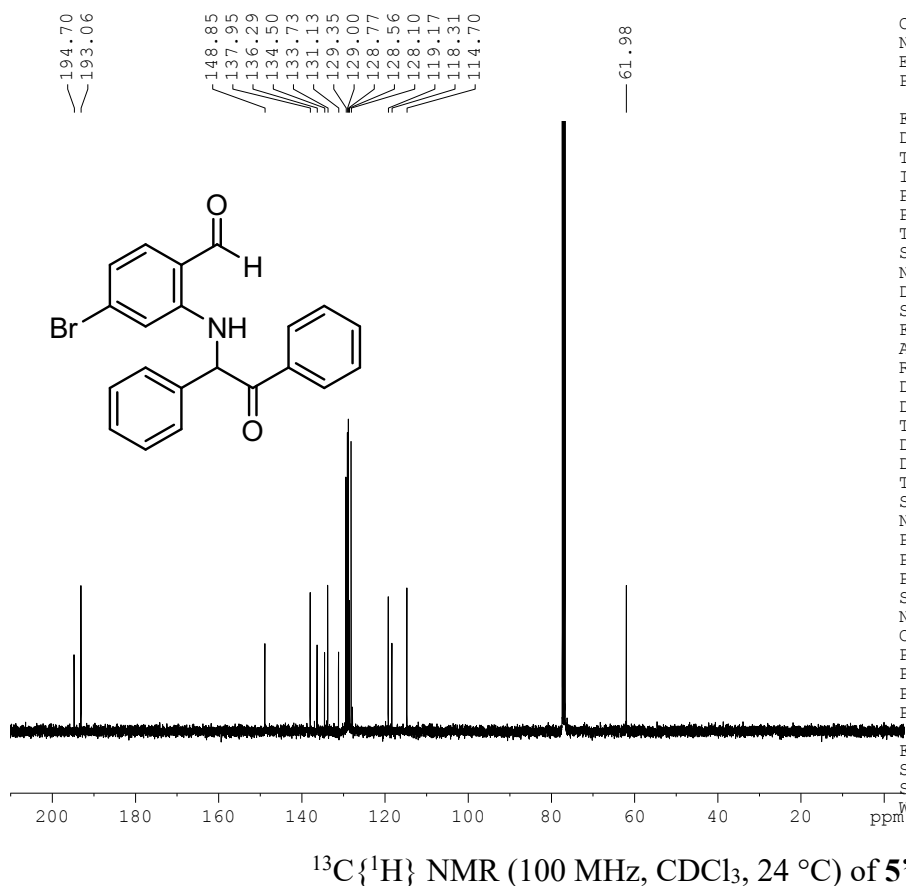

Current Data Parameters  
 NAME MM101(2)  
 EXPNO 525  
 PROCNO 1

F2 - Acquisition Parameters  
 Date\_ 20231001  
 Time 2.34 h  
 INSTRUM spect  
 PROBHD Z129392\_0001 (  
 PULPROG zgpg30  
 TD 65536  
 SOLVENT CDCl3  
 NS 256  
 DS 4  
 SWH 24038.461 Hz  
 FIDRES 0.733596 Hz  
 AQ 1.3631488 sec  
 RG 200.34  
 DW 20.800 usec  
 DE 6.50 usec  
 TE 298.8 K  
 D1 2.00000000 sec  
 D11 0.03000000 sec  
 TD0 1  
 SFO1 100.6228298 MHz  
 NUC1 13C  
 P0 3.33 usec  
 P1 10.00 usec  
 PLW1 47.00000000 W  
 SFO2 400.1316005 MHz  
 NUC2 1H  
 CPDPRG[2] waltz65  
 PCPD2 90.00 usec  
 PLW2 10.50000000 W  
 PLW12 0.29166999 W  
 PLW13 0.14670999 W

F2 - Processing parameters  
 SI 32768  
 SF 100.6127685 MHz  
 WDW EM

## Benzil

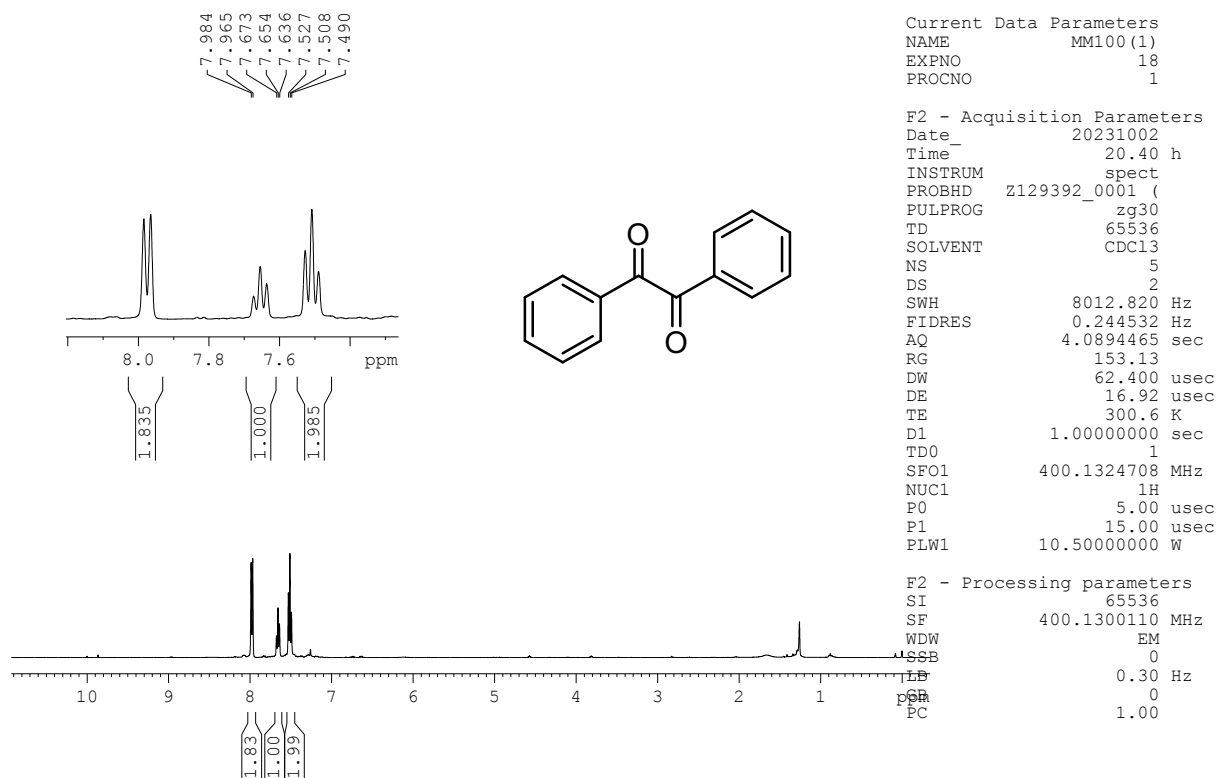

<sup>1</sup>H NMR (400 MHz, CDCl<sub>3</sub>, 24 °C) of Benzil

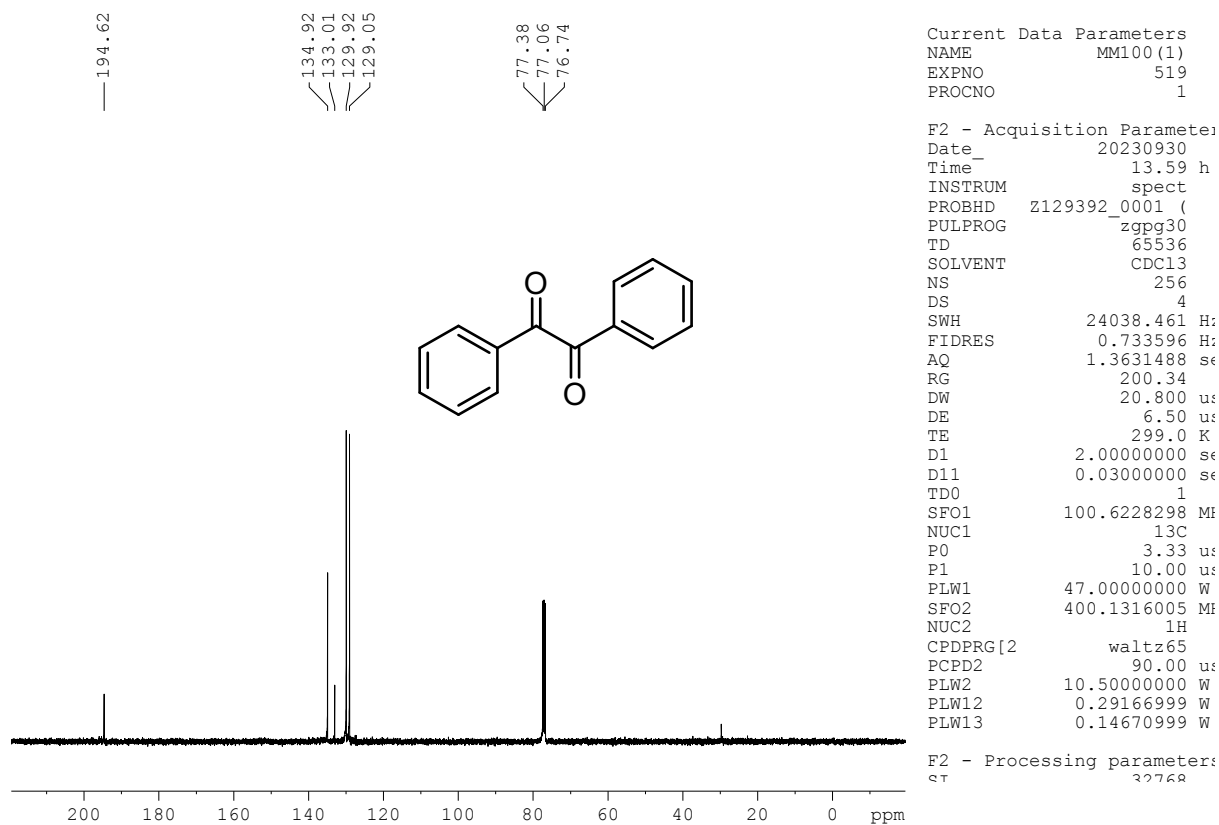

<sup>13</sup>C{<sup>1</sup>H} NMR (100 MHz, CDCl<sub>3</sub>, 24 °C) of Benzil

phenyl(2-phenyl-1H-indol-3-yl)methanone: **6a**

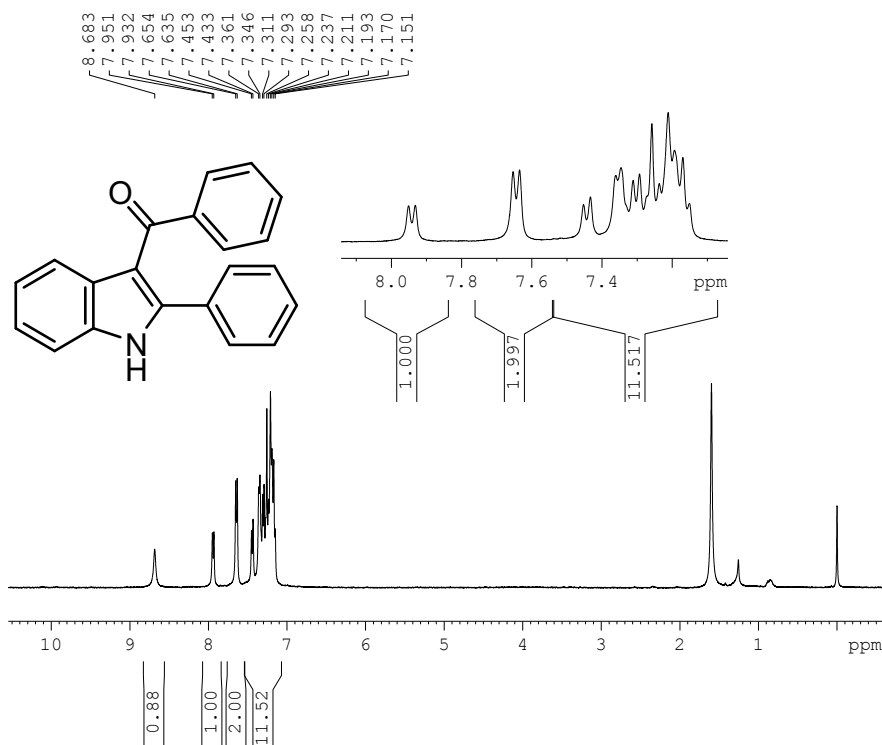

Current Data Parameters  
 NAME 1017  
 EXPNO 460  
 PROCNO 1

F2 - Acquisition Parameters  
 Date\_ 20211020  
 Time\_ 3.02 h  
 INSTRUM spect  
 PROBHD Z129392\_0001 (  
 PULPROG zg30  
 TD 65536  
 SOLVENT CDC13  
 NS 16  
 DS 2  
 SWH 8012.820 Hz  
 FIDRES 0.244532 Hz  
 AQ 4.0894465 sec  
 RG 200.34  
 DW 62.400 usec  
 DE 6.50 usec  
 TE 297.6 K  
 D1 0.50000000 sec  
 TD0 1  
 SFO1 400.1320007 MHz  
 NUC1 1H  
 P1 15.00 usec  
 PLW1 10.50000000 W

F2 - Processing parameters  
 SI 65536  
 SF 400.1300100 MHz  
 WDW EM  
 SSB 0  
 LB 0.30 Hz  
 GB 0  
 PC 1.00

<sup>13</sup>C{<sup>1</sup>H} NMR (100 MHz, CDCl<sub>3</sub>, 24 °C) of the compound **6a**

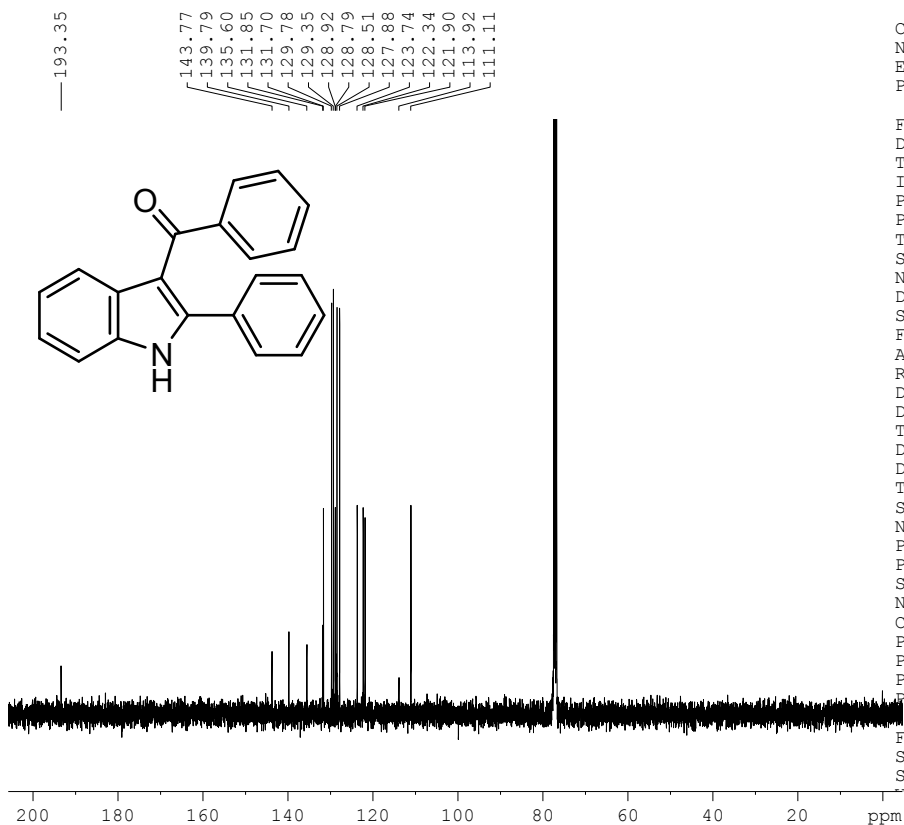

Current Data Parameters  
 NAME 1017  
 EXPNO 463  
 PROCNO 1

F2 - Acquisition Parameters  
 Date\_ 20211020  
 Time\_ 4.21 h  
 INSTRUM spect  
 PROBHD Z129392\_0001 (  
 PULPROG zgpg30  
 TD 16540  
 SOLVENT CDC13  
 NS 3000  
 DS 4  
 SWH 24038.461 Hz  
 FIDRES 2.906706 Hz  
 AQ 0.3440320 sec  
 RG 200.34  
 DW 20.800 usec  
 DE 6.50 usec  
 TE 298.3 K  
 D1 1.00000000 sec  
 D11 0.03000000 sec  
 TD0 1  
 SFO1 100.6228289 MHz  
 NUC1 13C  
 P1 10.00 usec  
 PLW1 47.00000000 W  
 SFO2 400.1316005 MHz  
 NUC2 1H  
 CPDPRG[2] waltz16  
 PCPD2 90.00 usec  
 PLW2 10.50000000 W  
 PLW12 0.29166999 W  
 PLW13 0.14670999 W

F2 - Processing parameters  
 SI 32768  
 SF 100.6127566 MHz

<sup>13</sup>C{<sup>1</sup>H} NMR (100 MHz, CDCl<sub>3</sub>, 24 °C) of the compound **6a**

(5-methoxy-2-phenyl-1H-indol-3-yl)(phenyl)methanone: **6b**

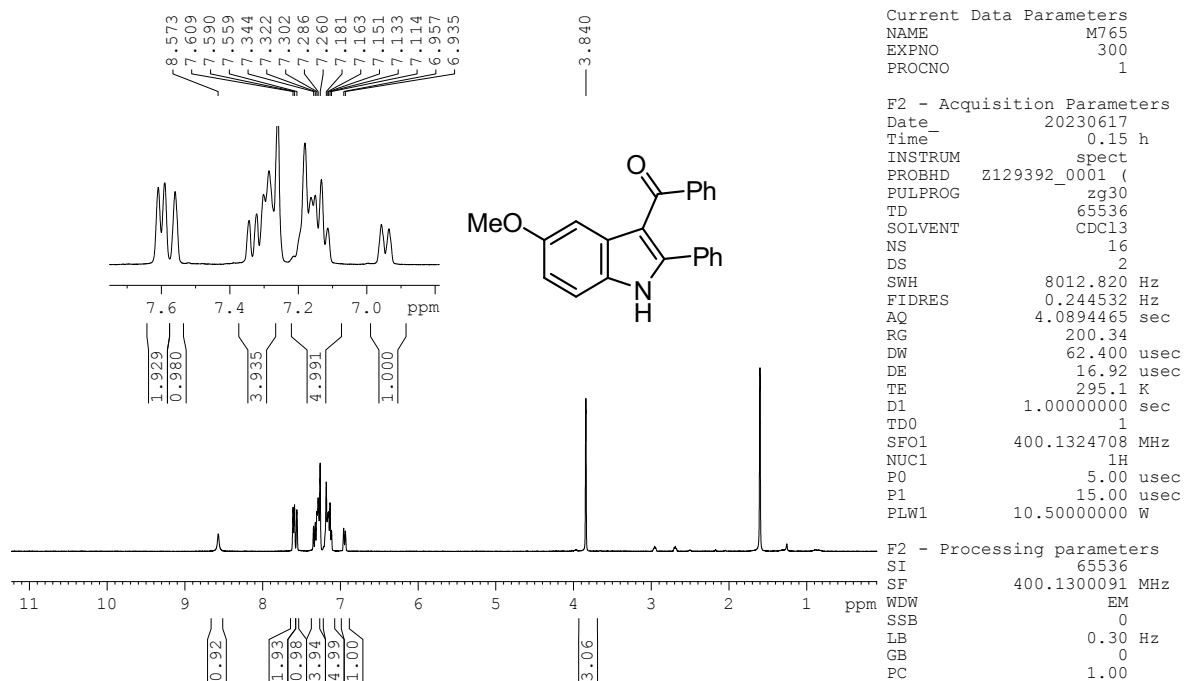

$^1\text{H}$  NMR (400 MHz,  $\text{CDCl}_3$ , 24 °C) of the compound **6b**

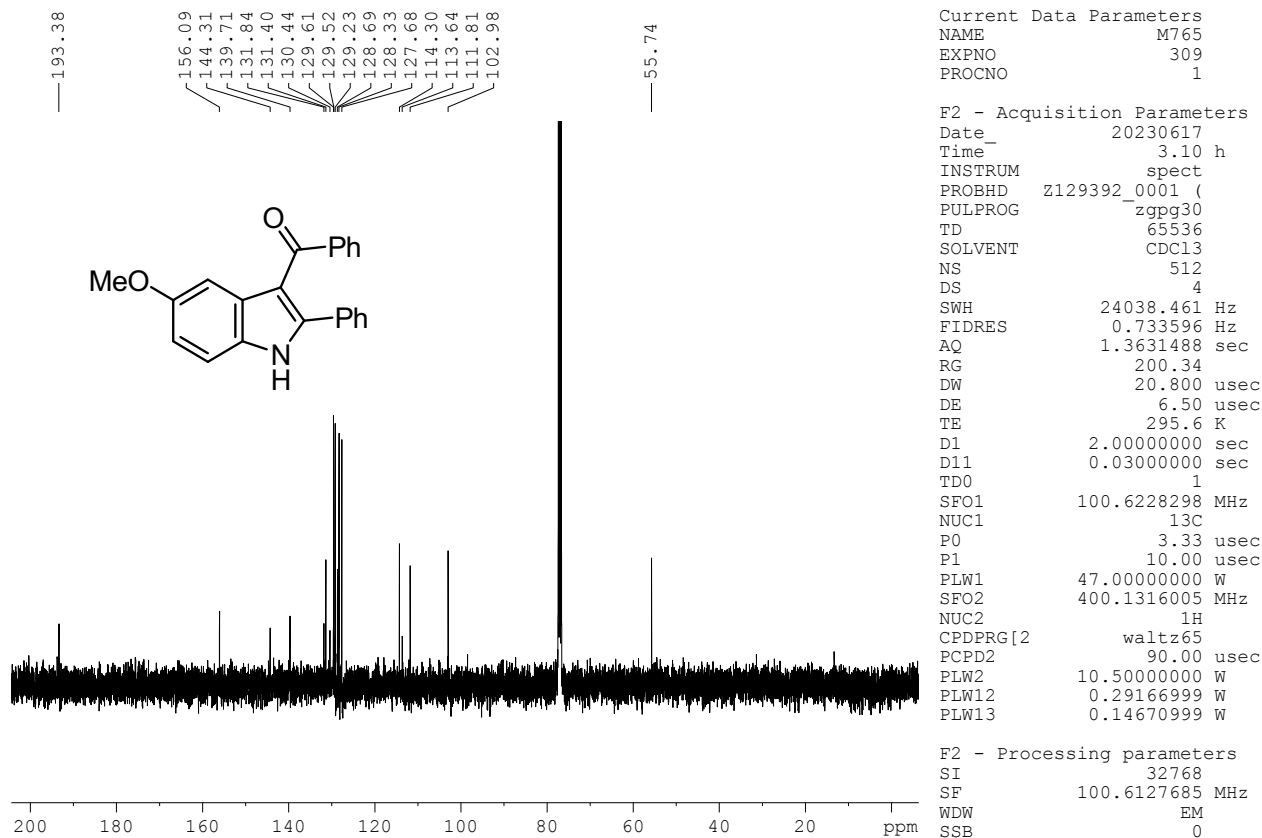

$^{13}\text{C}\{^1\text{H}\}$  NMR (100 MHz,  $\text{CDCl}_3$ , 24 °C) of the compound **6b**

(5-chloro-2-phenyl-1H-indol-3-yl)(phenyl)methanone: **6c**

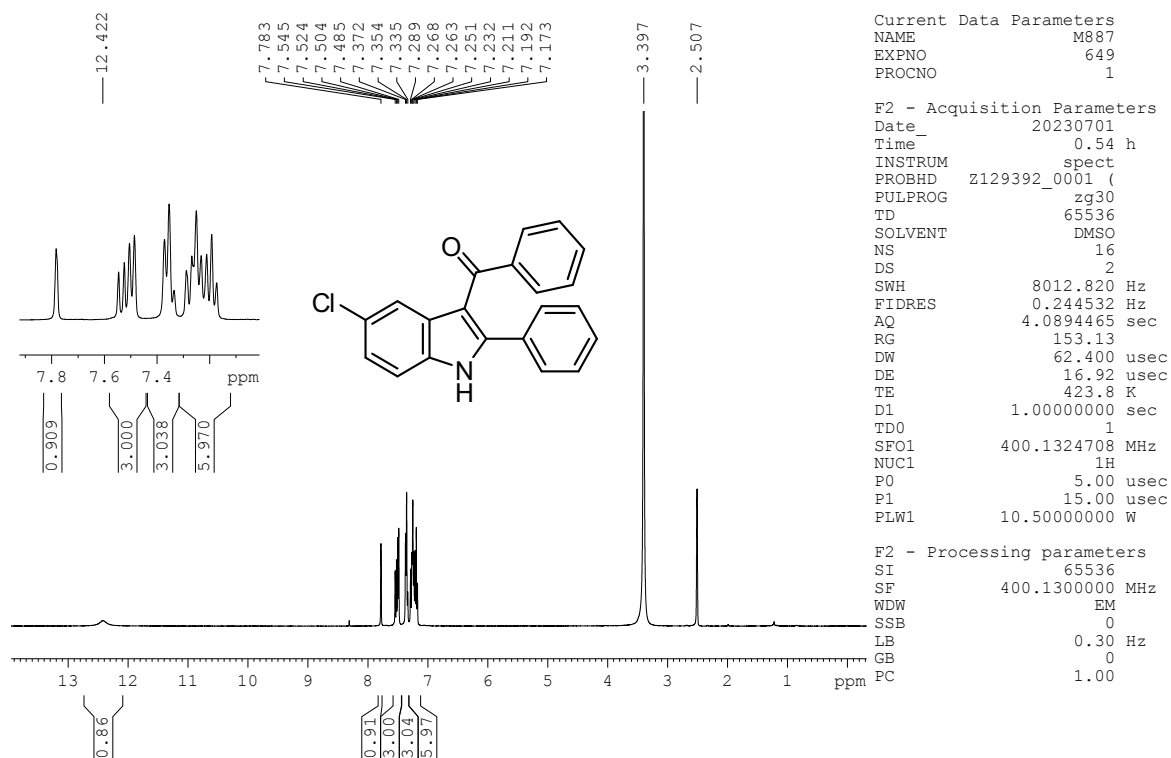

<sup>1</sup>H NMR (400 MHz, DMSO-d<sub>6</sub>, 24 °C) of the compound **6c**

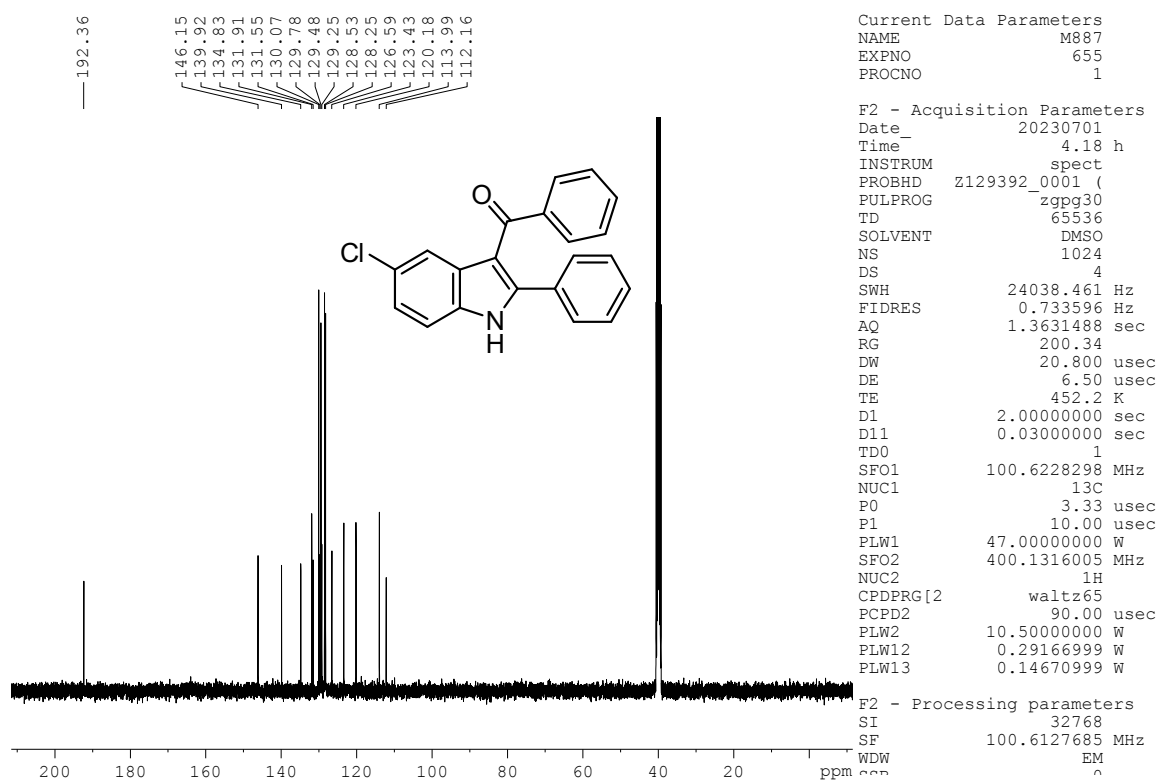

<sup>13</sup>C{<sup>1</sup>H} NMR (100 MHz, DMSO-d<sub>6</sub>, 24 °C) of the compound **6c**



### (5-bromo-2-phenyl-1H-indol-3-yl)(phenyl)methanone: **6d**

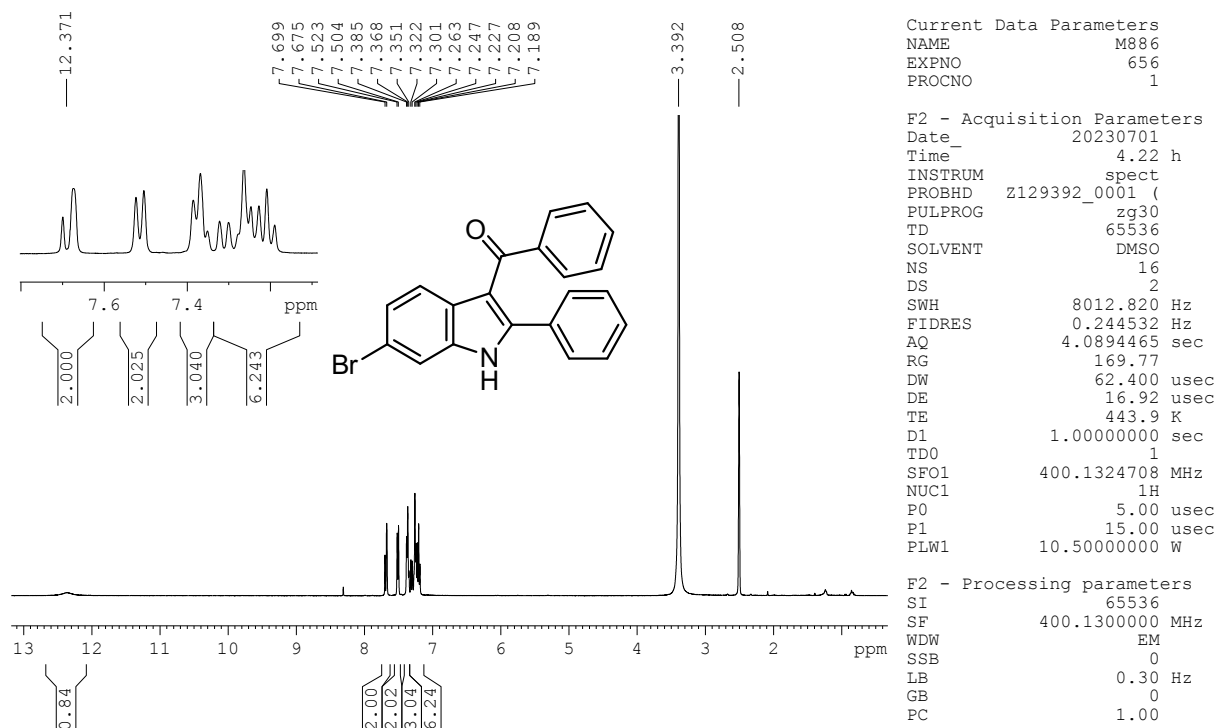

<sup>1</sup>H NMR (400 MHz, DMSO-d<sub>6</sub>, 24 °C) of the compound **6d**

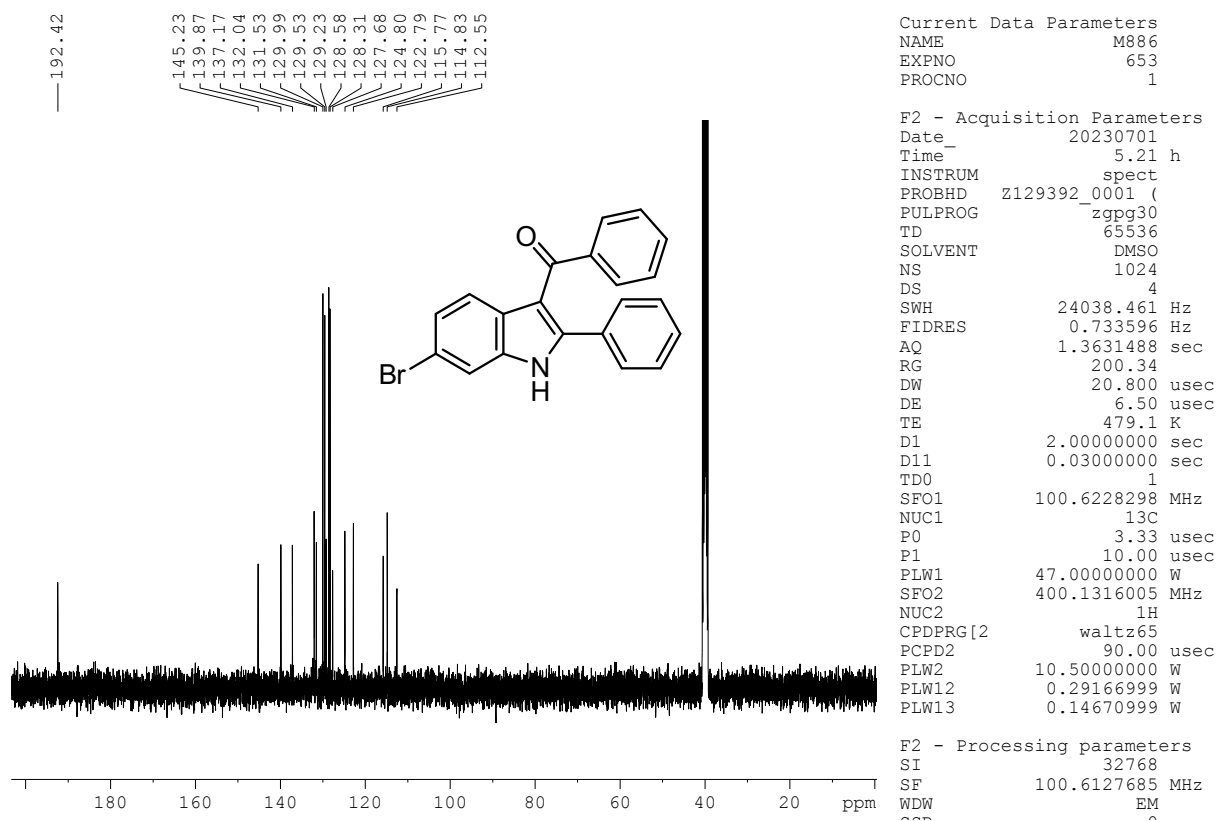

<sup>13</sup>C {<sup>1</sup>H} NMR (100 MHz, DMSO-d<sub>6</sub>, 24 °C) of the compound **6d**

**methyl 3-benzoyl-2-phenyl-1H-indole-6-carboxylate: 6e**

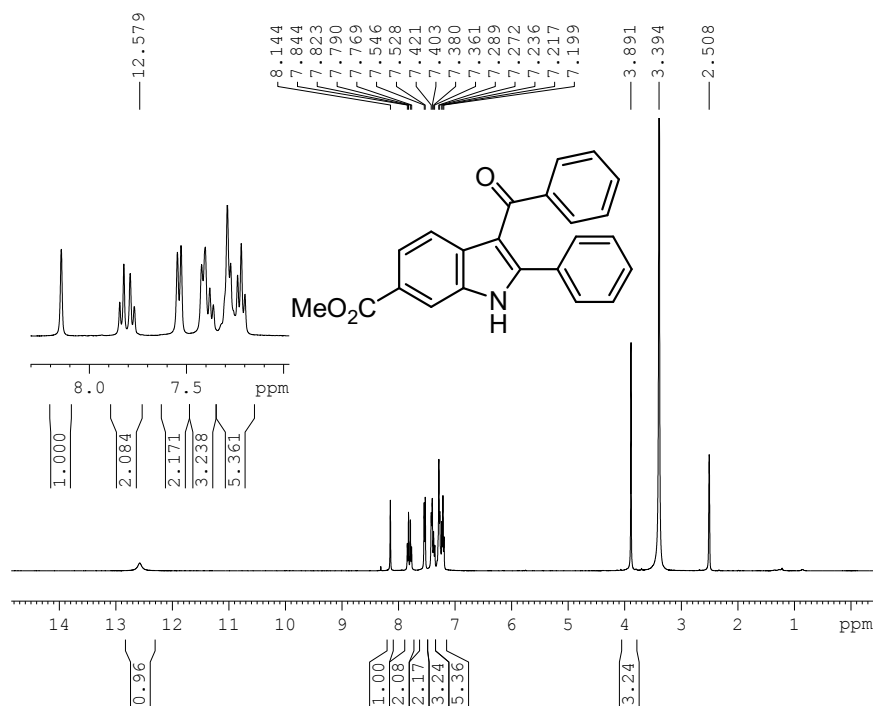

Current Data Parameters  
 NAME M889  
 EXPNO 13  
 PROCNO 1

F2 - Acquisition Parameters  
 Date\_ 20230702  
 Time\_ 3.18 h  
 INSTRUM spect  
 PROBHD Z129392\_0001 ( )  
 PULPROG zg30  
 TD 65536  
 SOLVENT DMSO  
 NS 16  
 DS 2  
 SWH 8012.820 Hz  
 FIDRES 0.244532 Hz  
 AQ 4.0894465 sec  
 RG 138.85  
 DW 62.400 usec  
 DE 16.92 usec  
 TE 489.0 K  
 D1 1.00000000 sec  
 TD0 1  
 SFO1 400.1324708 MHz  
 NUC1 1H  
 P0 5.00 usec  
 P1 15.00 usec  
 PLW1 10.50000000 W

F2 - Processing parameters  
 SI 65536  
 SF 400.1300000 MHz  
 WDW EM  
 SSB 0  
 LB 0.30 Hz  
 GB 0  
 PC 1.00

<sup>1</sup>H NMR (400 MHz, DMSO-d<sub>6</sub>, 24 °C) of the compound **6e**

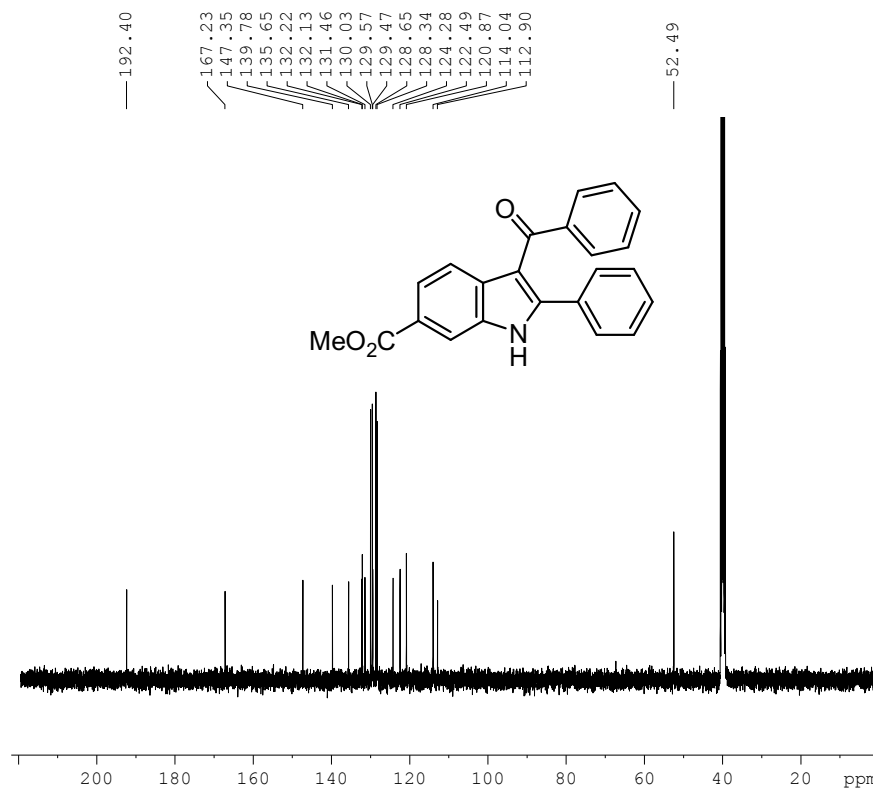

Current Data Parameters  
 NAME M889  
 EXPNO 14  
 PROCNO 1

F2 - Acquisition Parameters  
 Date\_ 20230702  
 Time\_ 4.21 h  
 INSTRUM spect  
 PROBHD Z129392\_0001 ( )  
 PULPROG zgpg30  
 TD 65536  
 SOLVENT DMSO  
 NS 512  
 DS 4  
 SWH 24038.461 Hz  
 FIDRES 0.733596 Hz  
 AQ 1.3631488 sec  
 RG 200.34  
 DW 20.800 usec  
 DE 6.50 usec  
 TE 464.7 K  
 D1 2.00000000 sec  
 D11 0.03000000 sec  
 TD0 1  
 SFO1 100.6228298 MHz  
 NUC1 13C  
 P0 3.33 usec  
 P1 10.00 usec  
 PLW1 47.00000000 W  
 SFO2 400.1316005 MHz  
 NUC2 1H  
 CPDPRG[2] waltz65  
 PCPD2 90.00 usec  
 PLW2 10.50000000 W  
 PLW12 0.29166999 W  
 PLW13 0.14670999 W

F2 - Processing parameters  
 SI 32768  
 SF 100.6127685 MHz

<sup>13</sup>C{<sup>1</sup>H} NMR (100 MHz, DMSO-d<sub>6</sub>, 24 °C) of the compound **6e**

### (6-nitro-2-phenyl-1H-indol-3-yl)(phenyl)methanone: 6f

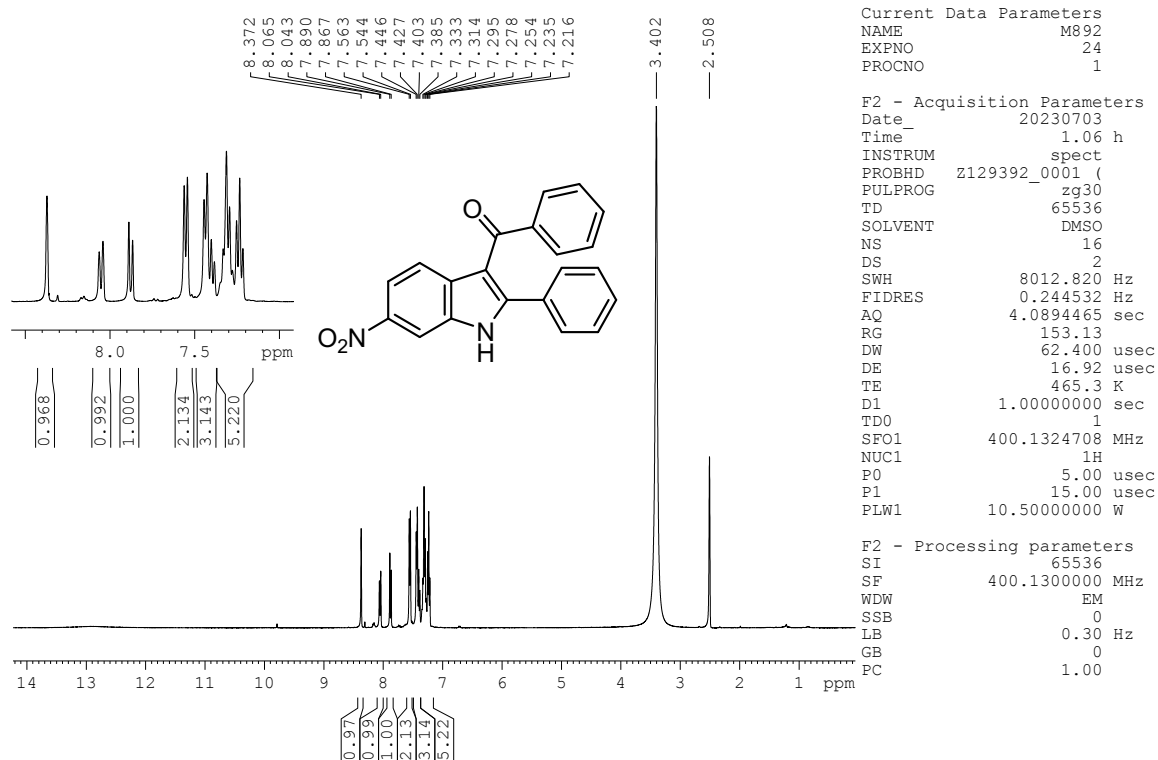

### <sup>1</sup>H NMR (400 MHz, DMSO-d<sub>6</sub>, 24 °C) of the compound 6f

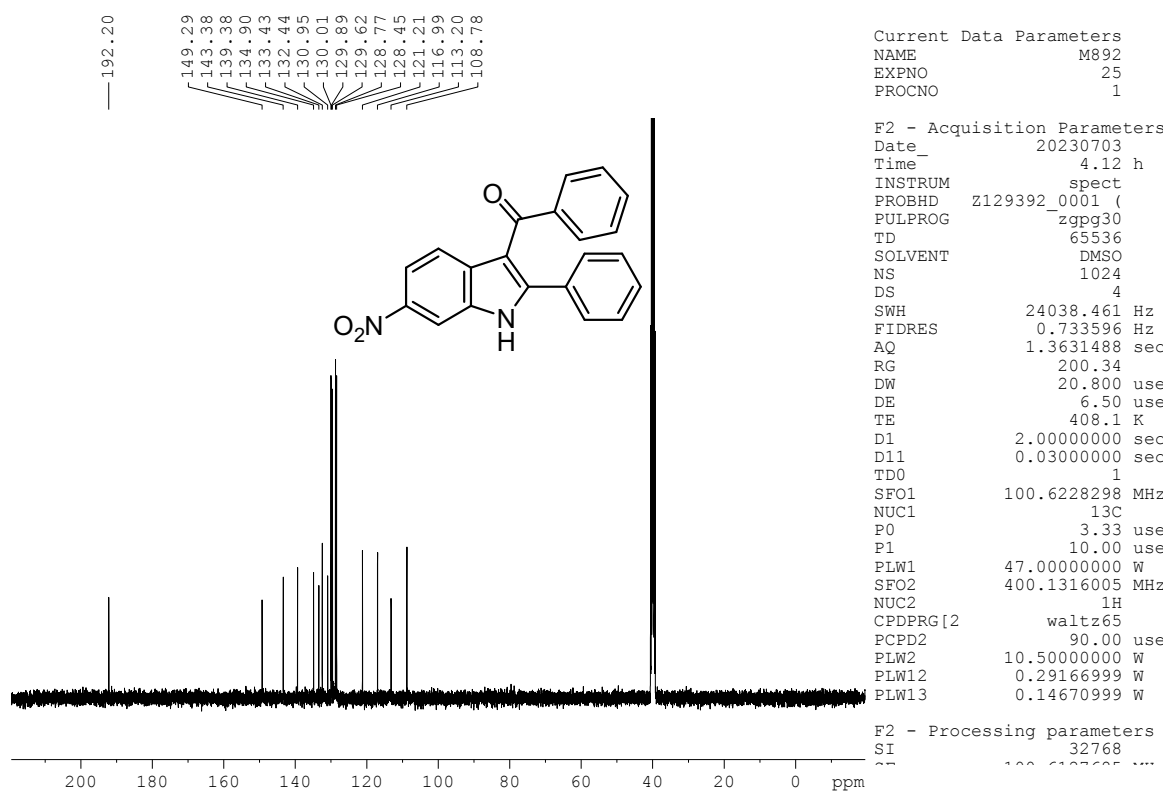

### <sup>13</sup>C{<sup>1</sup>H} NMR (100 MHz, DMSO-d<sub>6</sub>, 24 °C) of the compound 6f

**p-tolyl(2-(p-tolyl)-1H-indol-3-yl)methanone: 6g**

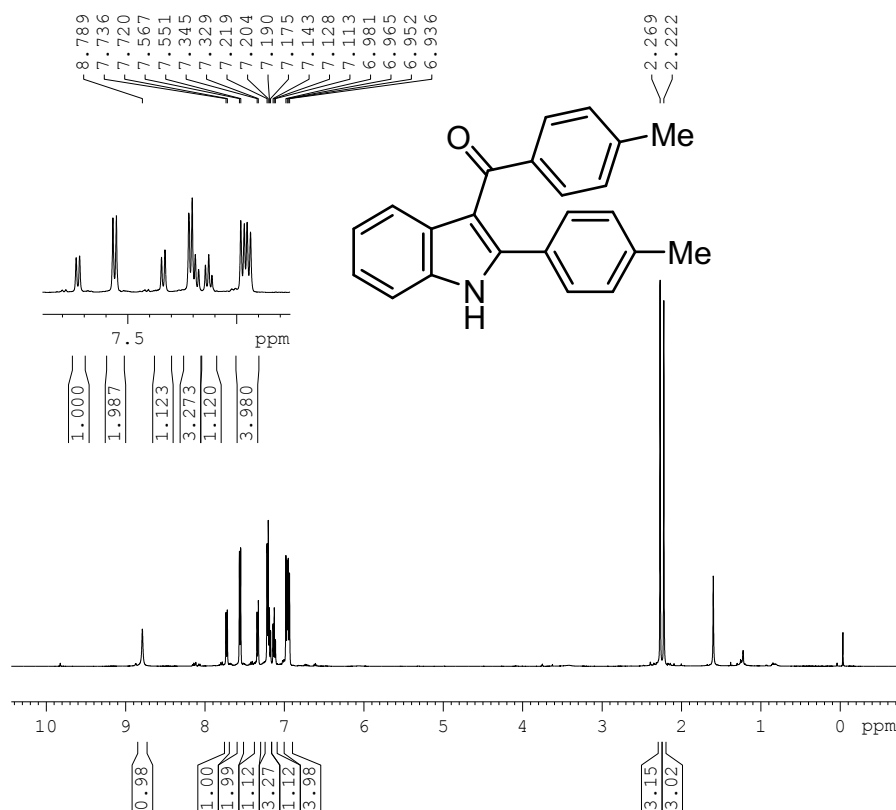

Current Data Parameters  
 NAME M732  
 EXPNO 170  
 PROCNO 1

F2 - Acquisition Parameter  
 Date\_ 20230328  
 Time 11.36  
 INSTRUM spect  
 PROBHD 5 mm PABBO BB/  
 PULPROG zg30  
 TD 32768  
 SOLVENT CDCl3  
 NS 32  
 DS 2  
 SWH 10000.000 Hz  
 FIDRES 0.305176 Hz  
 AQ 1.6384000 se  
 RG 124.08  
 DW 50.000 us  
 DE 6.50 us  
 TE 302.9 K  
 D1 0.50000000 se  
 TD0 1

==== CHANNEL f1 =====  
 SFO1 500.1525008 MH  
 NUC1 1H  
 P1 11.75 us  
 PLW1 15.30000019 W

F2 - Processing parameters  
 SI 65536  
 SF 500.1500336 MH  
 WDW EM  
 SSB 0  
 LB 0.30 Hz  
 GB 0  
 PC 1.00

**<sup>1</sup>H NMR (500 MHz, CDCl<sub>3</sub>, 24 °C) of the compound 6g**

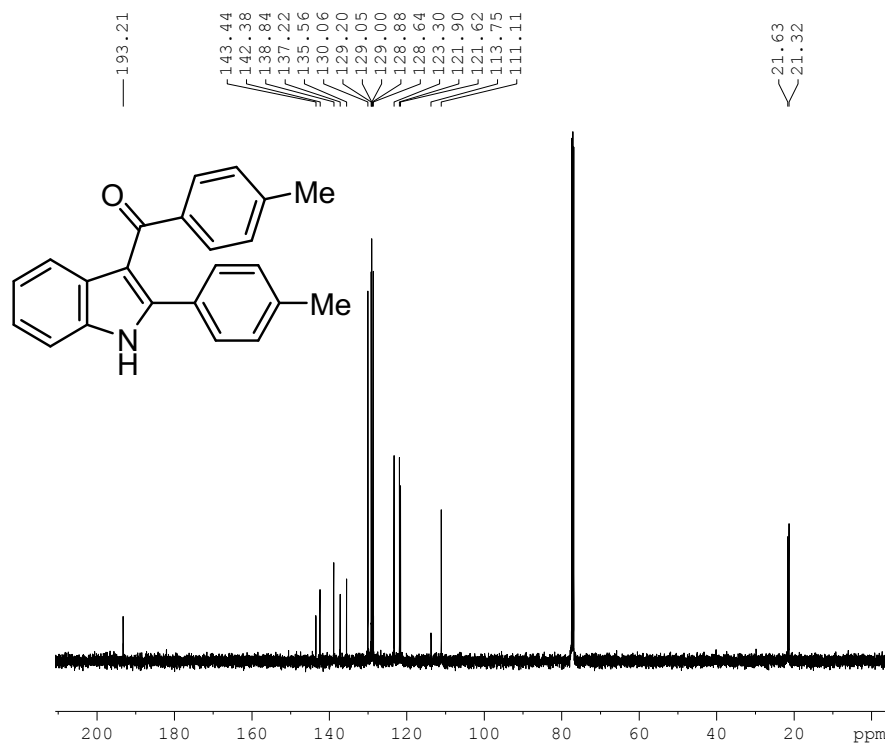

Current Data Parameters  
 NAME M732  
 EXPNO 171  
 PROCNO 1

F2 - Acquisition Parameters  
 Date\_ 20230328  
 Time 11.49  
 INSTRUM spect  
 PROBHD 5 mm PABBO BB/  
 PULPROG zgpg30  
 TD 20480  
 SOLVENT CDCl3  
 NS 512  
 DS 4  
 SWH 29761.904 Hz  
 FIDRES 1.453218 Hz  
 AQ 0.3440640 sec  
 RG 202.34  
 DW 16.800 usec  
 DE 6.50 usec  
 TE 303.7 K  
 D1 1.00000000 sec  
 D11 0.03000000 sec  
 TD0 1

==== CHANNEL f1 =====  
 SFO1 125.7753932 MHz  
 NUC1 13C  
 P1 10.20 usec  
 PLW1 103.00000000 W

==== CHANNEL f2 =====  
 SFO2 500.1520006 MHz  
 NUC2 1H  
 CPDPRG[2] waltz16  
 PCPD2 80.00 usec  
 PLW2 15.30000019 W  
 PLW12 0.39658999 W  
 PTW13 0.19448000 W

**<sup>13</sup>C{<sup>1</sup>H} NMR (125 MHz, CDCl<sub>3</sub>, 24 °C) of the compound 6g**

**(3-bromophenyl)(2-(3-bromophenyl)-1H-indol-3-yl)methanone: 6h**

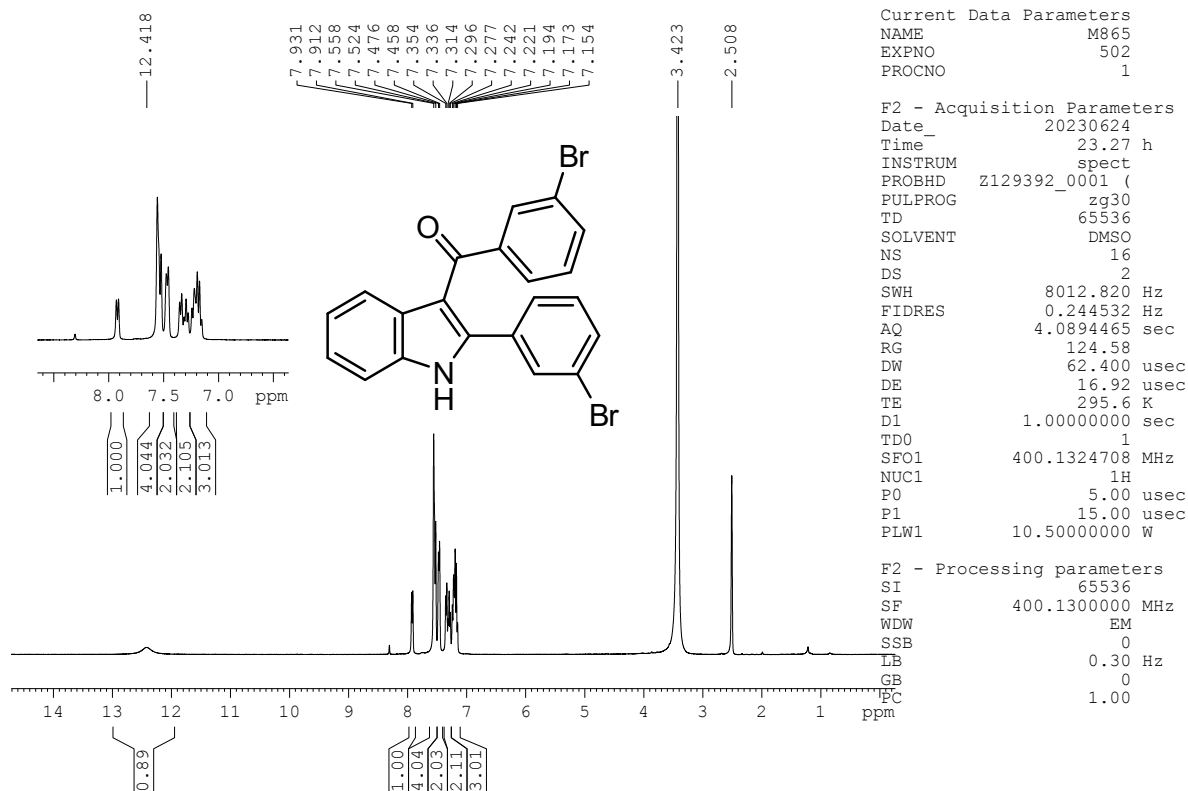

**<sup>1</sup>H NMR (400 MHz, DMSO-d<sub>6</sub>, 24 °C) of the compound 6h**

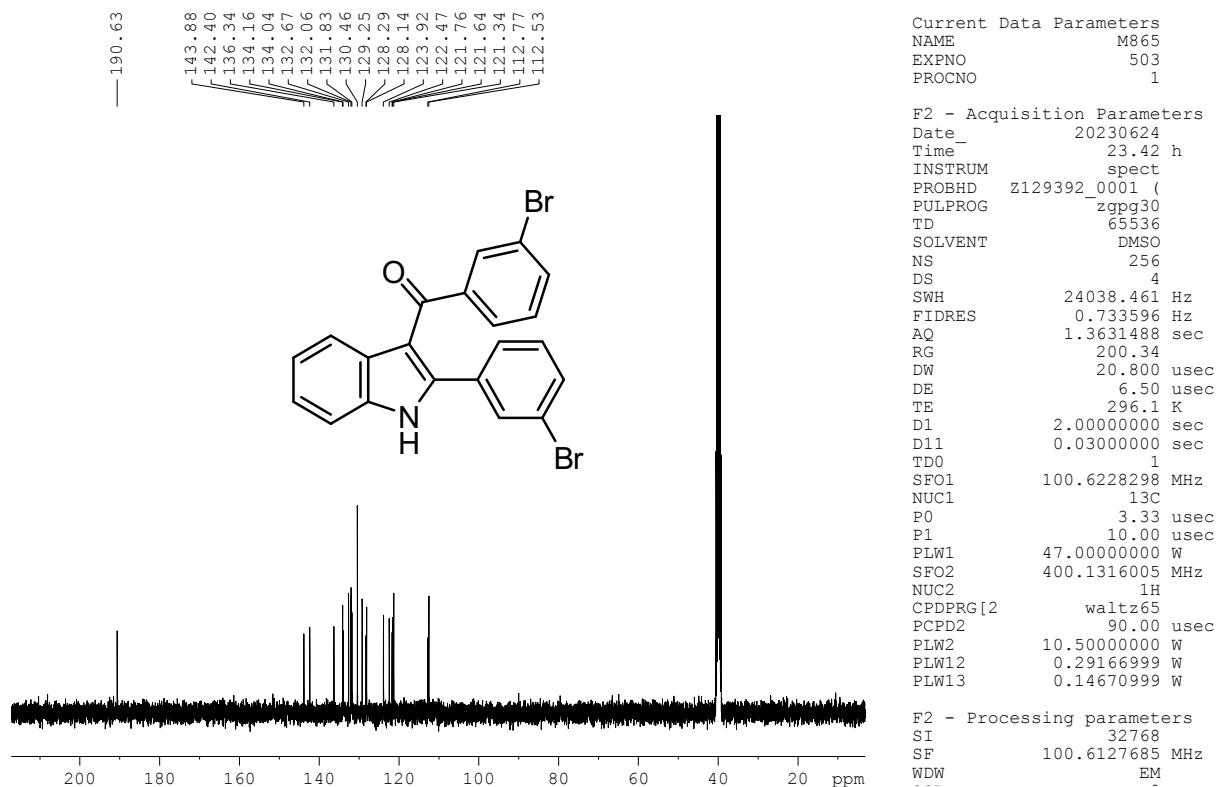

**<sup>13</sup>C {<sup>1</sup>H} NMR (100 MHz, DMSO-d<sub>6</sub>, 24 °C) of the compound 6h**

**1-(2-methyl-1H-indol-3-yl)ethan-1-one: 6i**

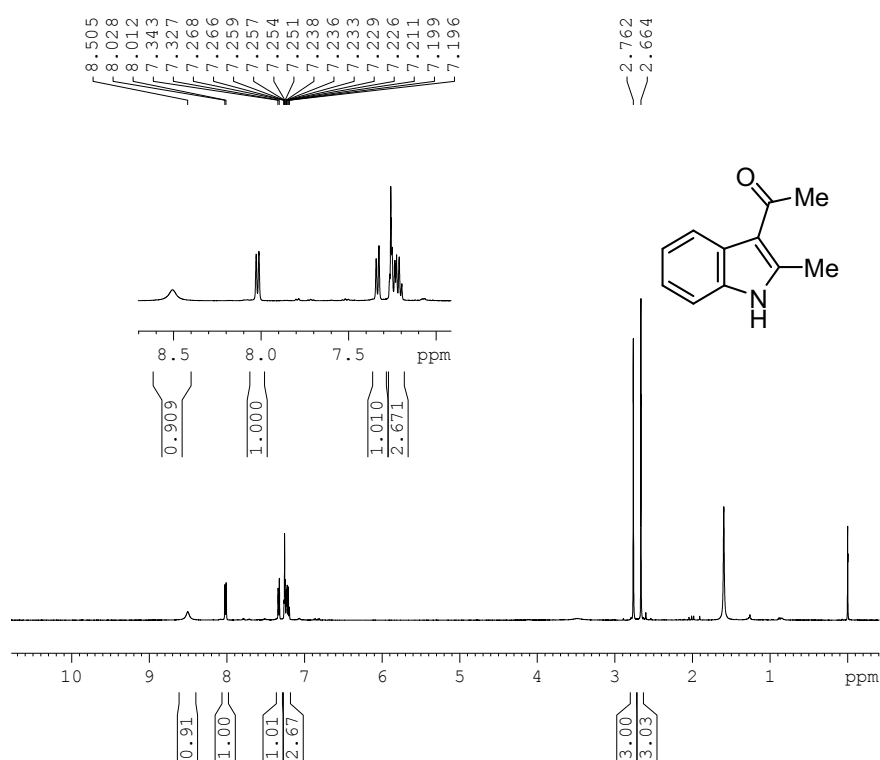

Current Data Parameters  
 NAME M735  
 EXPNO 35  
 PROCNO 1

F2 - Acquisition Parameters  
 Date\_ 20230405  
 Time\_ 22.33  
 INSTRUM spect  
 PROBHD 5 mm PABBO BB/  
 PULPROG zg30  
 TD 32768  
 SOLVENT CDCl3  
 NS 32  
 DS 2  
 SWH 10000.000 Hz  
 FIDRES 0.305176 Hz  
 AQ 1.6384000 sec  
 RG 202.34  
 DW 50.000 usec  
 DE 6.50 usec  
 TE 305.3 K  
 D1 0.50000000 sec  
 TD0 1

===== CHANNEL f1 =====  
 SFO1 500.1525008 MHz  
 NUC1 1H  
 P1 11.75 usec  
 PLW1 15.30000019 W

F2 - Processing parameters  
 SI 65536  
 SF 500.1500115 MHz  
 WDW EM  
 SSB 0  
 LB 0.30 Hz  
 GB 0  
 PC 1.00

<sup>1</sup>H NMR (500 MHz, CDCl<sub>3</sub>, 24 °C) of the compound **6i**

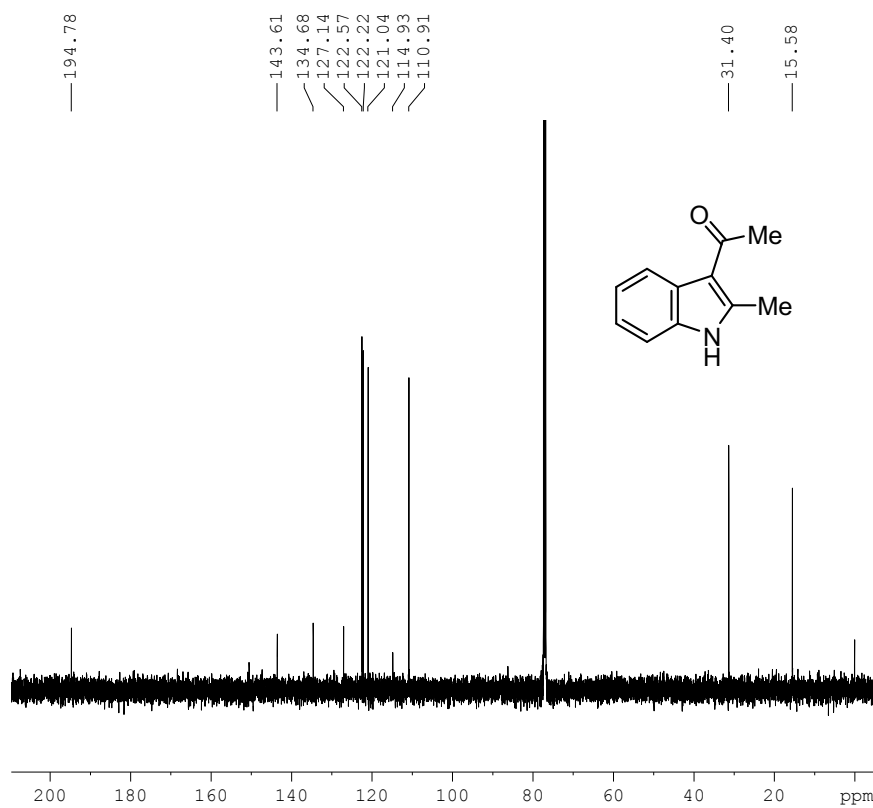

Current Data Parameters  
 NAME M735  
 EXPNO 36  
 PROCNO 1

F2 - Acquisition Parameters  
 Date\_ 20230405  
 Time\_ 23.22  
 INSTRUM spect  
 PROBHD 5 mm PABBO BB/  
 PULPROG zgpg30  
 TD 20480  
 SOLVENT CDCl3  
 NS 2000  
 DS 4  
 SWH 29761.904 Hz  
 FIDRES 1.453218 Hz  
 AQ 0.3440640 sec  
 RG 202.34  
 DW 16.800 usec  
 DE 6.50 usec  
 TE 306.3 K  
 D1 1.00000000 sec  
 D11 0.03000000 sec  
 TD0 1

===== CHANNEL f1 =====  
 SFO1 125.7753932 MHz  
 NUC1 13C  
 P1 10.20 usec  
 PLW1 103.00000000 W

===== CHANNEL f2 =====  
 SFO2 500.1520006 MHz  
 NUC2 1H  
 CPDPRG[2] waltz16  
 PCPD2 80.00 usec  
 PLW2 15.30000019 W  
 PLW12 0.39658999 W  
 PLW13 0.19948000 W

F2 - Processing parameters  
 ST 32768

<sup>13</sup>C{<sup>1</sup>H} NMR (125 MHz, CDCl<sub>3</sub>, 24 °C) of the compound **6i**

**1-(2-phenyl-1H-indol-3-yl)ethan-1-one: 6j**

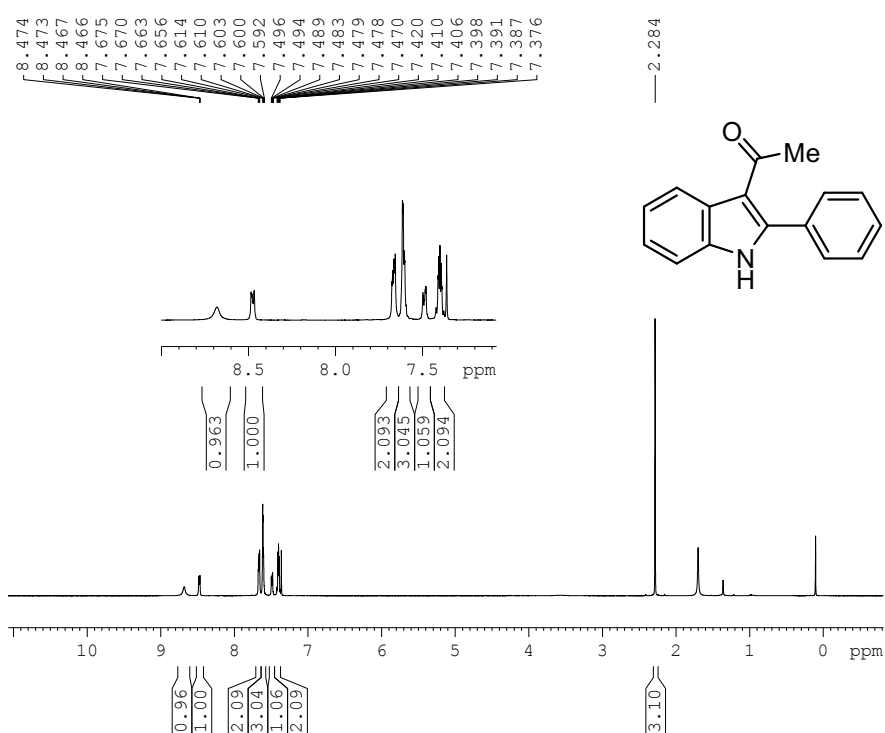

Current Data Parameters  
 NAME M736  
 EXPNO 193  
 PROCNO 1

F2 - Acquisition Parameters  
 Date\_ 20230331  
 Time\_ 9.41  
 INSTRUM spect  
 PROBHD 5 mm PABBO BB/  
 PULPROG zg30  
 TD 32768  
 SOLVENT CDC13  
 NS 32  
 DS 2  
 SWH 10000.000 Hz  
 FIDRES 0.305176 Hz  
 AQ 1.6384000 sec  
 RG 202.34  
 DW 50.000 usec  
 DE 6.50 usec  
 TE 303.2 K  
 D1 0.50000000 sec  
 TD0 1

===== CHANNEL f1 =====  
 SFO1 500.1525008 MHz  
 NUC1 1H  
 P1 11.75 usec  
 PLW1 15.30000019 W

F2 - Processing parameters  
 SI 65536  
 SF 500.1499619 MHz  
 WDW EM  
 SSB 0  
 LB 0.30 Hz  
 GB 0  
 PC 1.00

**<sup>1</sup>H NMR (500 MHz, CDCl<sub>3</sub>, 24 °C) of the compound 6j**

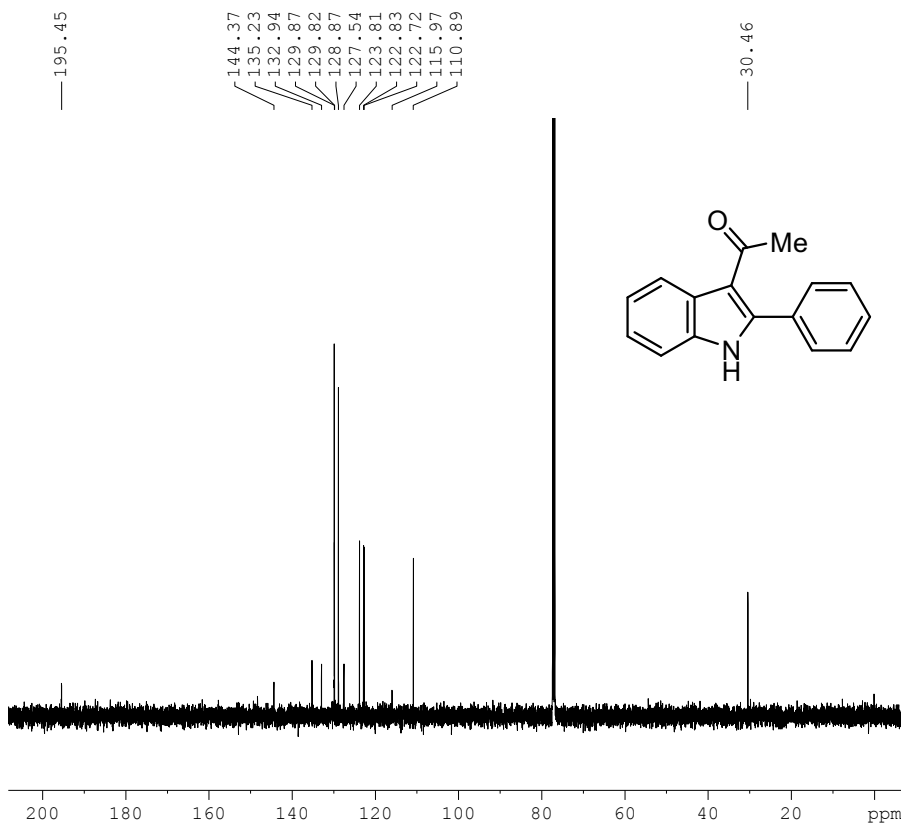

Current Data Parameters  
 NAME M736  
 EXPNO 194  
 PROCNO 1

F2 - Acquisition Paramete  
 Date\_ 20230331  
 Time\_ 9.55  
 INSTRUM spect  
 PROBHD 5 mm PABBO BB/  
 PULPROG zgpg30  
 TD 20480  
 SOLVENT CDC13  
 NS 512  
 DS 4  
 SWH 29761.904 H  
 FIDRES 1.453218 H  
 AQ 0.3440640 s  
 RG 202.34  
 DW 16.800 u  
 DE 6.50 u  
 TE 304.2 K  
 D1 1.00000000 s  
 D11 0.03000000 s  
 TD0 1

===== CHANNEL f1 =====  
 SFO1 125.7753932 M  
 NUC1 13C  
 P1 10.20 u  
 PLW1 103.00000000 W

===== CHANNEL f2 =====  
 SFO2 500.1520006 M  
 NUC2 1H  
 CPDPRG[2] waltz16  
 PCPD2 80.00 u  
 PLW2 15.30000019 W  
 PLW12 0.39658999 W  
 PLW13 0.19948000 W

**<sup>13</sup>C{<sup>1</sup>H} NMR (125 MHz, CDCl<sub>3</sub>, 24 °C) of the compound 6j**

(2-methyl-1H-indol-3-yl)(phenyl)methanone: 6j'

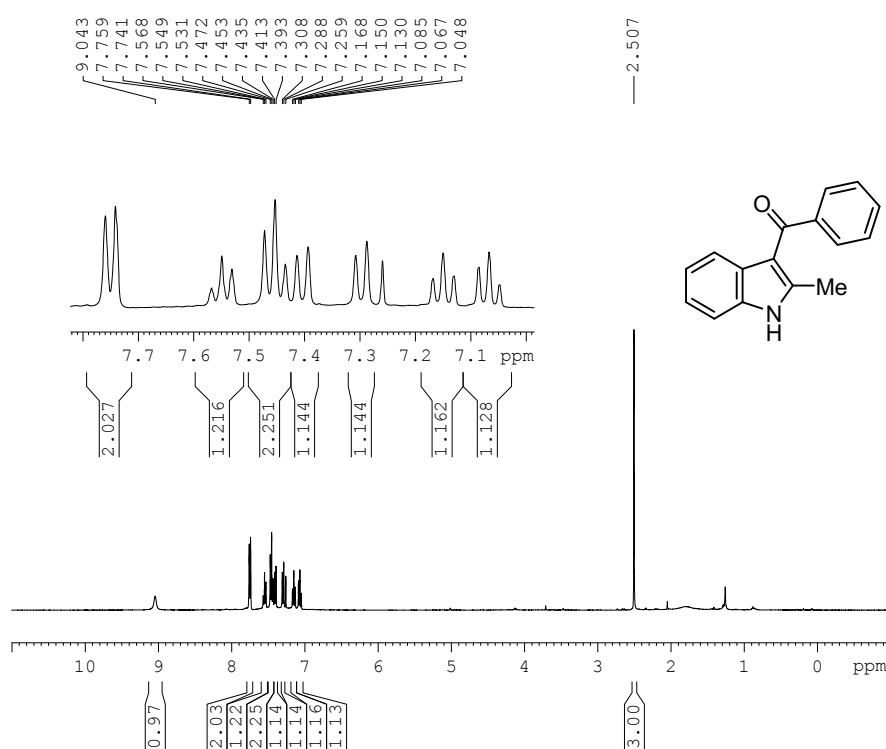

Current Data Parameters  
NAME 1084(C)  
EXPNO 248  
PROCNO 1

F2 - Acquisition Parameters  
Date\_ 20211213  
Time\_ 23.20 h  
INSTRUM spect  
PROBHD Z129392\_0001 (  
PULPROG zg30  
TD 65536  
SOLVENT CDCl3  
NS 16  
DS 2  
SWH 8012.820 Hz  
FIDRES 0.244532 Hz  
AQ 4.0894465 sec  
RG 200.34  
DW 62.400 usec  
DE 6.50 usec  
TE 297.8 K  
D1 0.50000000 sec  
TD0 1  
SFO1 400.1320007 MHz  
NUC1 1H  
P1 15.00 usec  
PLW1 10.50000000 W

F2 - Processing parameters  
SI 65536  
SF 400.1300099 MHz  
WDW EM  
SSB 0  
LB 0.30 Hz  
GB 0  
PC 1.00

<sup>1</sup>H NMR (400 MHz, CDCl<sub>3</sub>, 24 °C) of the compound 6j'

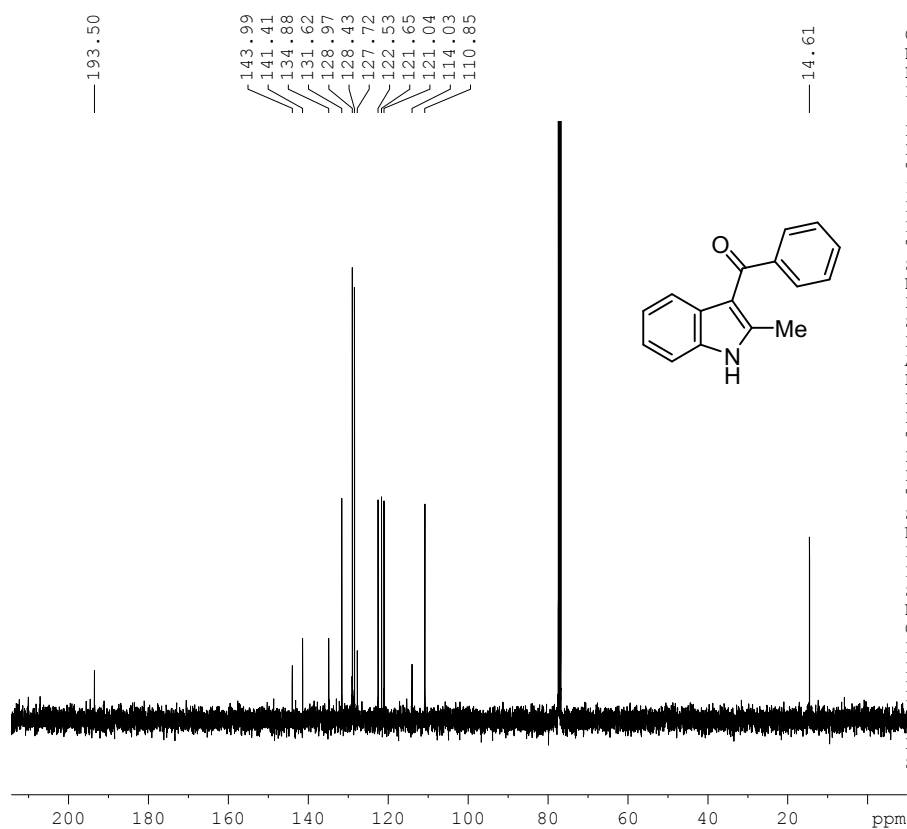

Current Data Parameters  
NAME 1084(C)  
EXPNO 249  
PROCNO 1

F2 - Acquisition Parameters  
Date\_ 20211213  
Time\_ 23.26 h  
INSTRUM spect  
PROBHD Z129392\_0001 (  
PULPROG zgpg30  
TD 16540  
SOLVENT CDCl3  
NS 256  
DS 4  
SWH 24038.461 Hz  
FIDRES 2.906706 Hz  
AQ 0.3440320 sec  
RG 200.34  
DW 20.800 usec  
DE 6.50 usec  
TE 298.4 K  
D1 1.00000000 sec  
D11 0.03000000 sec  
TD0 1  
SFO1 100.6228289 MHz  
NUC1 13C  
P1 10.00 usec  
PLW1 47.00000000 W  
SFO2 400.1316005 MHz  
NUC2 1H  
CPDPRG[2] waltz16  
PCPD2 90.00 usec  
PLW2 10.50000000 W  
PLW12 0.29166999 W  
PLW13 0.14670999 W

F2 - Processing parameters  
SI 32768

<sup>13</sup>C{<sup>1</sup>H} NMR (100 MHz, CDCl<sub>3</sub>, 24 °C) of the compound 6j'



# 1-phenyl-3H-pyrrolo[1,2-a]indole-2-carbaldehyde 7

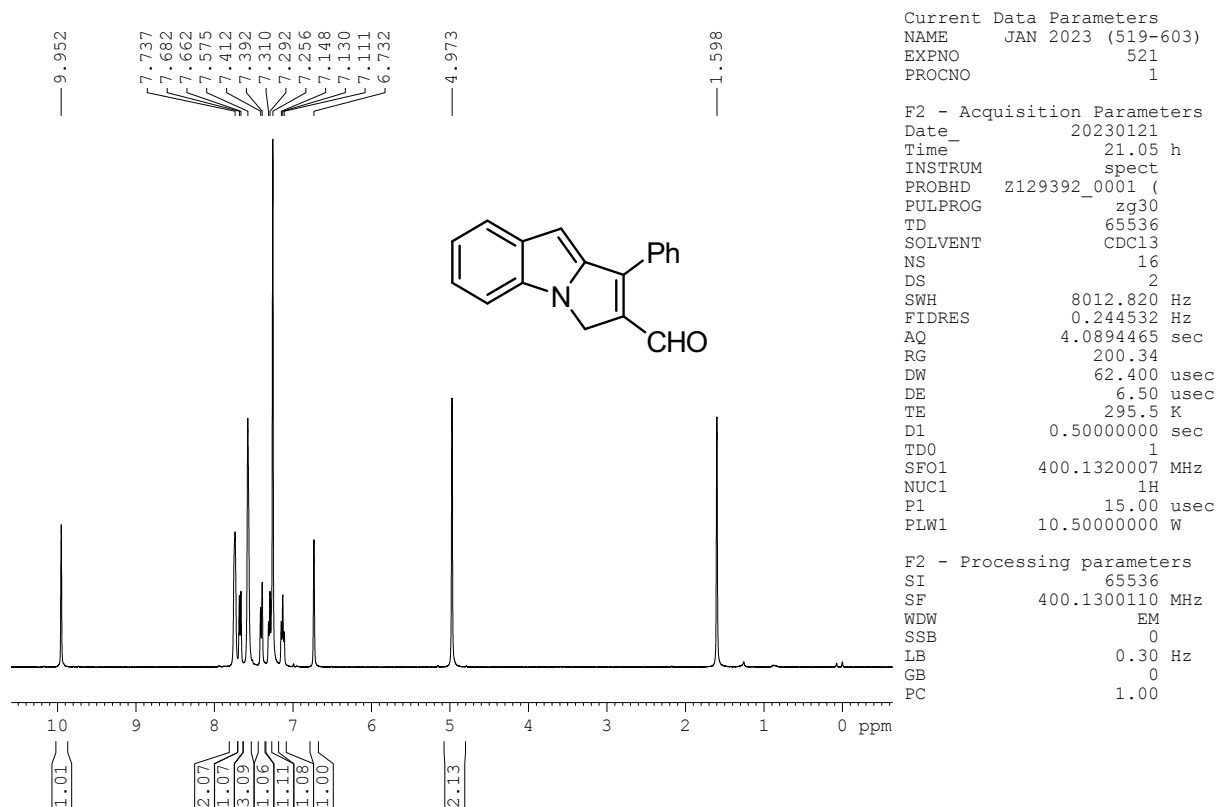

<sup>1</sup>H NMR (400 MHz, CDCl<sub>3</sub>, 24 °C) of the compound 7

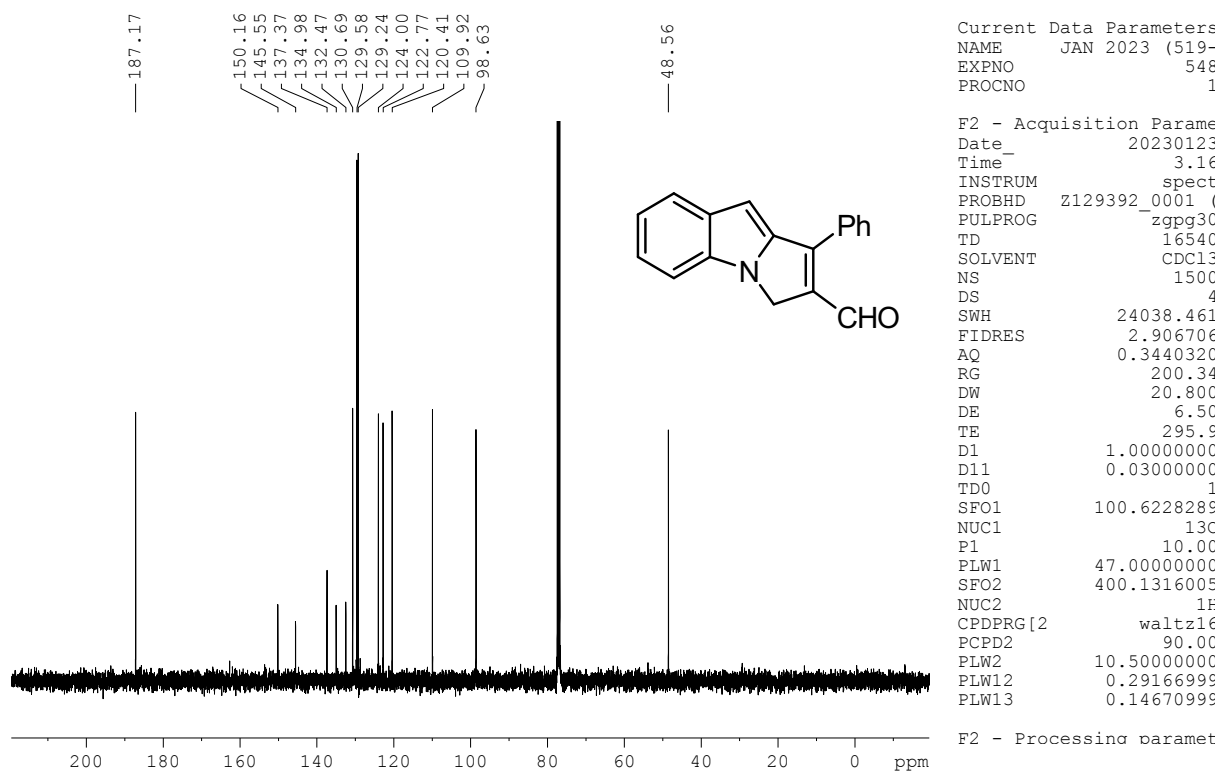

<sup>13</sup>C{<sup>1</sup>H} NMR (100 MHz, CDCl<sub>3</sub>, 24 °C) of the compound 7

(6-methyl-3-phenethyl-1H-indol-2-yl)(phenyl)methanone: 3x

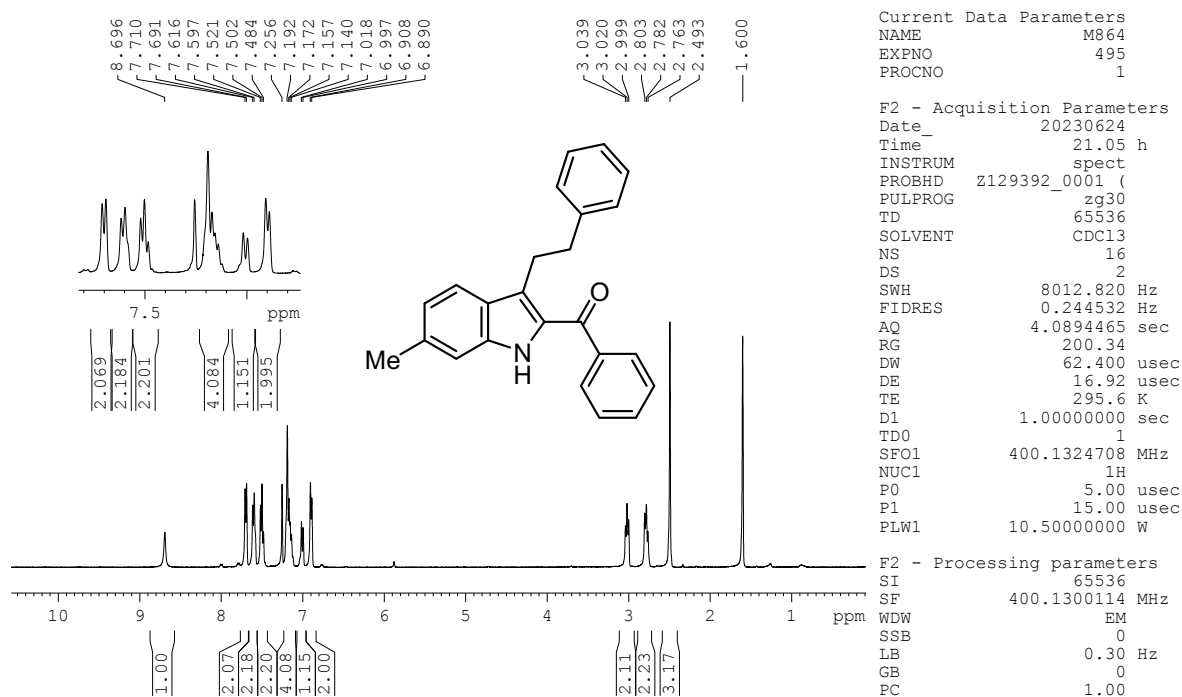

<sup>1</sup>H NMR (400 MHz, CDCl<sub>3</sub>, 24 °C) of the compound 3x

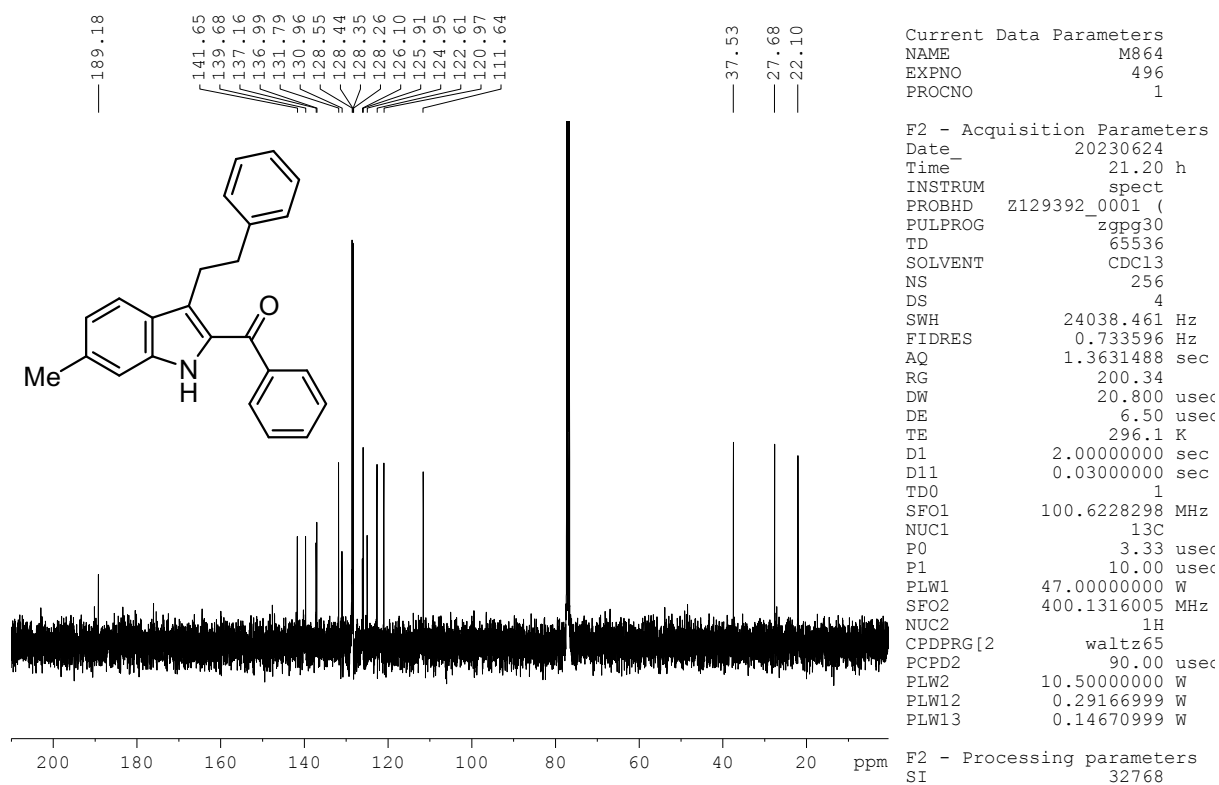

<sup>13</sup>C{<sup>1</sup>H} NMR (100 MHz, CDCl<sub>3</sub>, 24 °C) of the compound 3x

**methyl 2-benzoyl-6-methyl-3-phenethyl-1H-indole-5-carboxylate: 9**

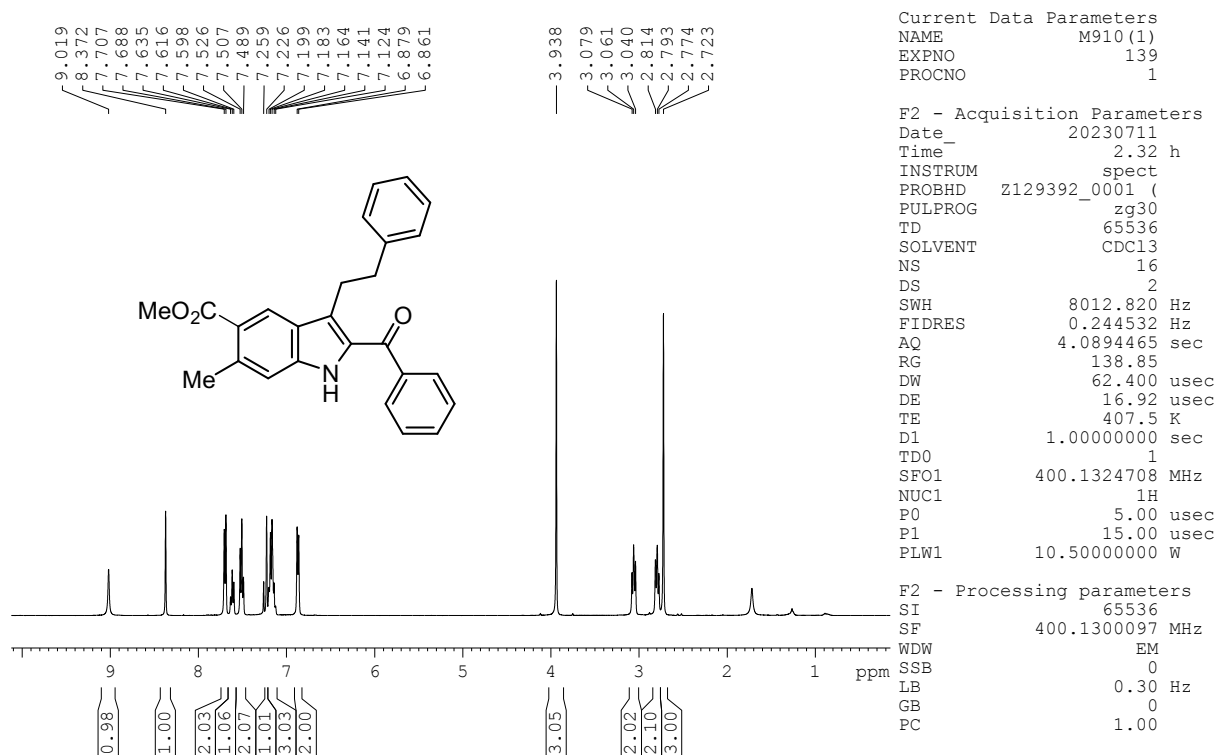

<sup>1</sup>H NMR (400 MHz, CDCl<sub>3</sub>, 24 °C) of the compound 9

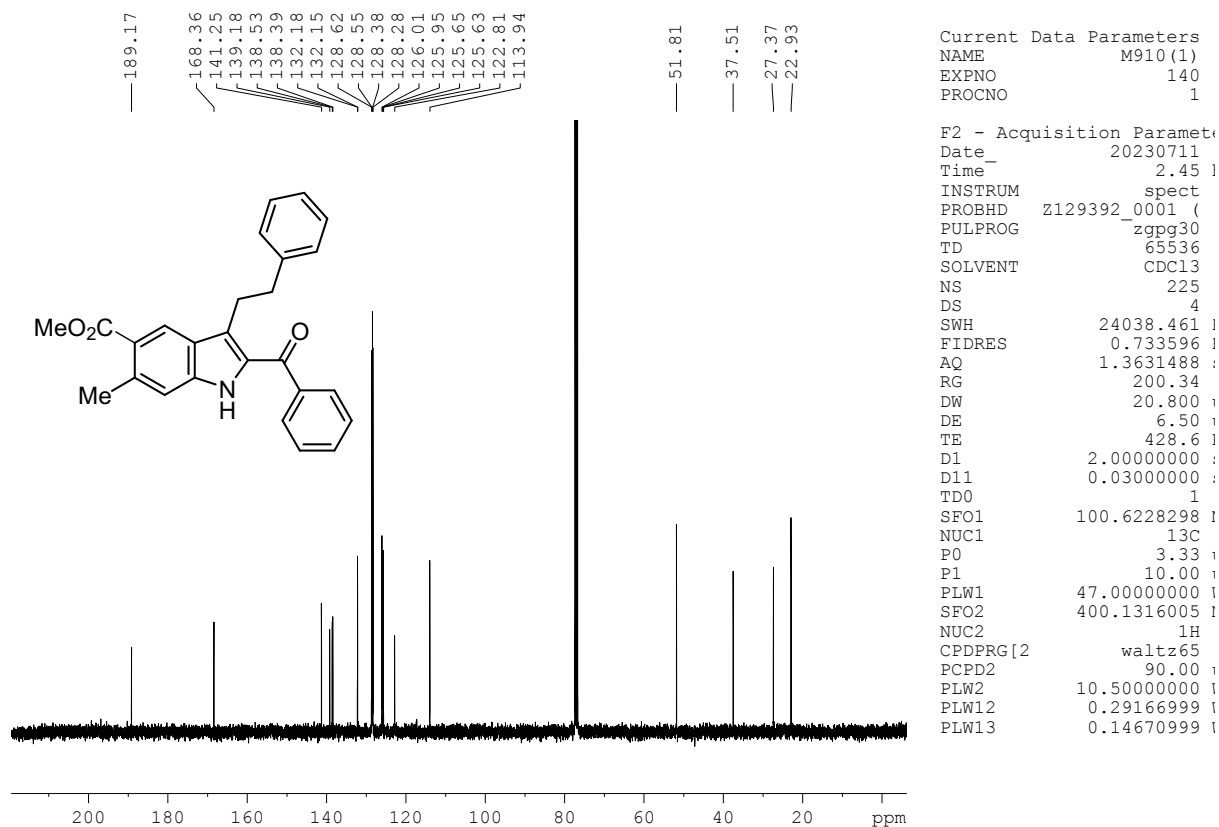

<sup>13</sup>C{<sup>1</sup>H} NMR (100 MHz, CDCl<sub>3</sub>, 24 °C) of the compound 9

## 2-benzoyl-6-methyl-3-phenethyl-1H-indole-5-carboxylic acid: 10

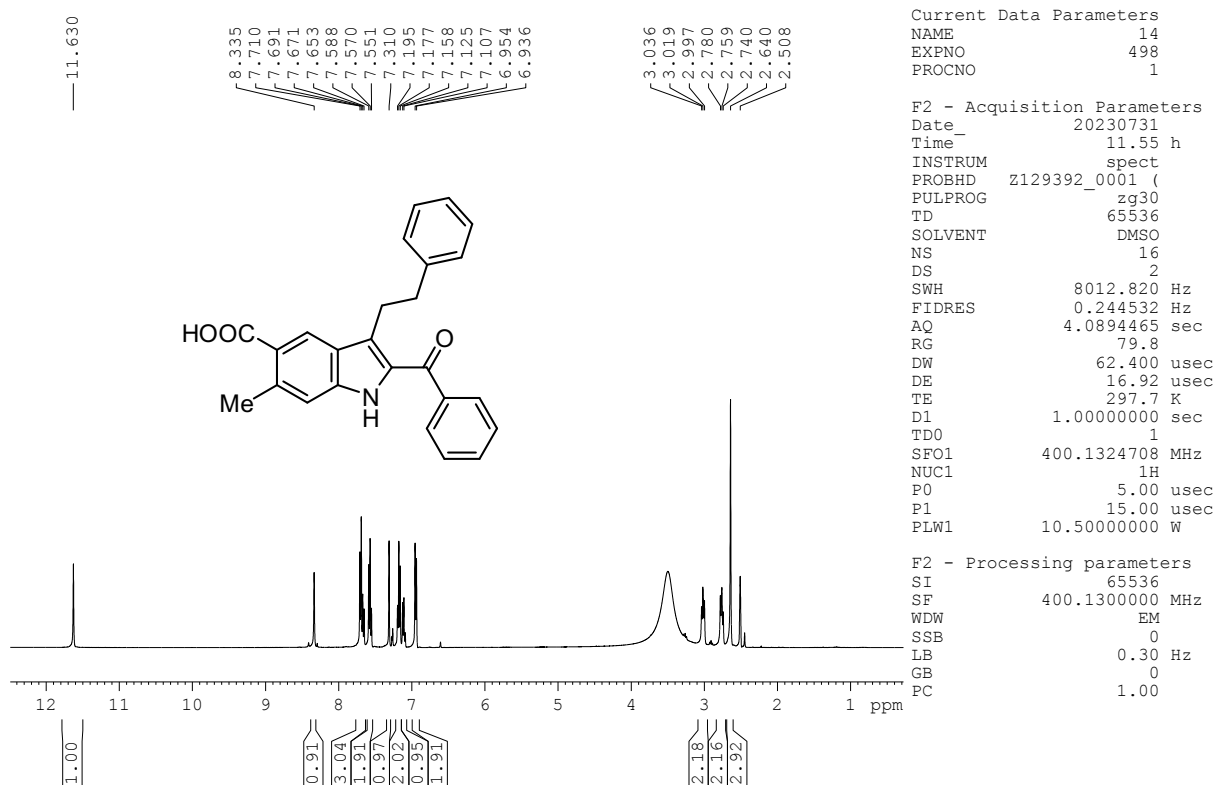

<sup>1</sup>H NMR (400 MHz, DMSO-d<sub>6</sub>, 24 °C) of the compound 10

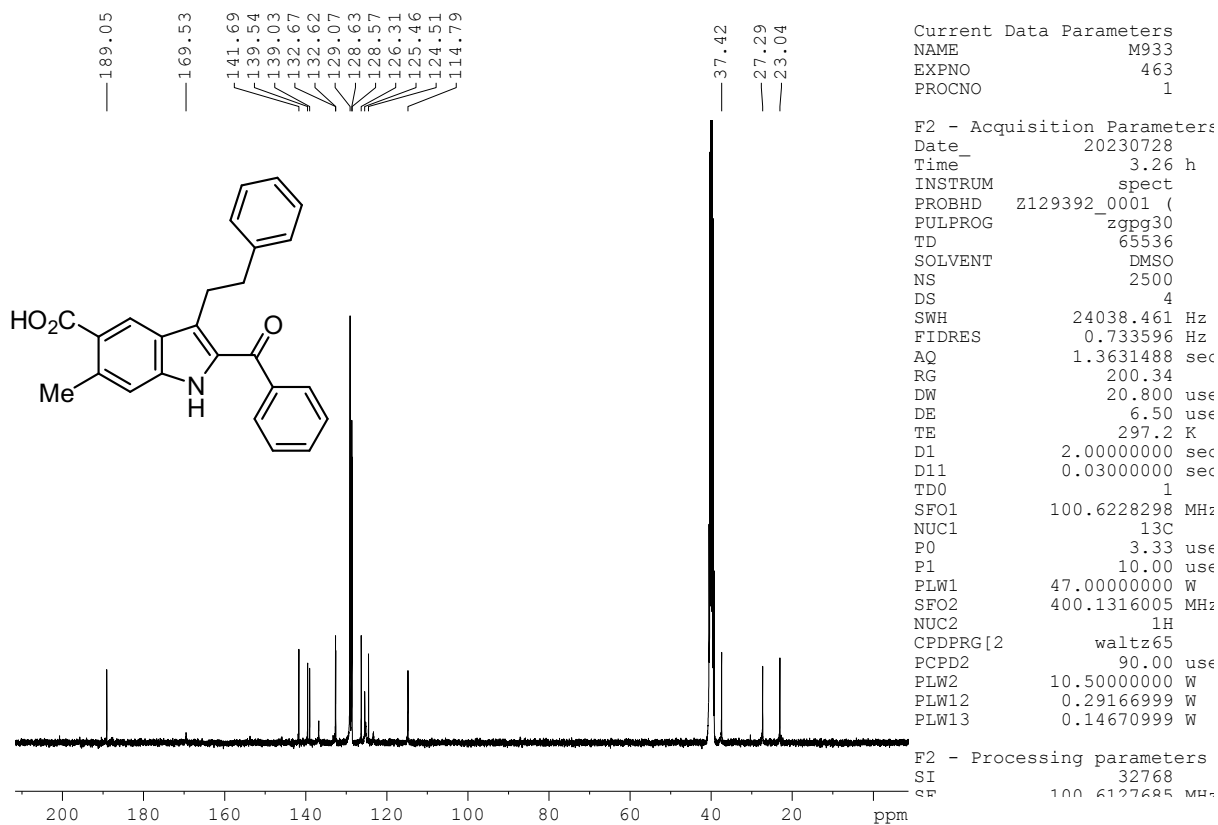

<sup>13</sup>C{<sup>1</sup>H} NMR (100 MHz, DMSO-d<sub>6</sub>, 24 °C) of the compound 10

## 10. XRD data of 3g, 6i, and 6j

### a. Single crystal XRD data of 3g:

| DATA                                  | 3g                                                                                                                                                                       |
|---------------------------------------|--------------------------------------------------------------------------------------------------------------------------------------------------------------------------|
| Molecular Structure (ORTEP Structure) | 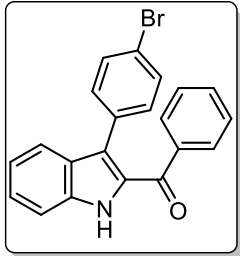<br> |
| Formula                               | C <sub>21</sub> H <sub>14</sub> BrNO                                                                                                                                     |
| Formula weight                        | 376.24                                                                                                                                                                   |
| Color                                 | Brownish white                                                                                                                                                           |
| Temperature/K                         | 296(2)                                                                                                                                                                   |
| Radiation                             | Mo K $\alpha$                                                                                                                                                            |
| Wavelength/Å                          | 0.71073                                                                                                                                                                  |
| Crystal system                        | Triclinic                                                                                                                                                                |
| Space group                           | P -1                                                                                                                                                                     |
| <i>a</i> (Å)                          | 8.6408(5)                                                                                                                                                                |
| <i>b</i> (Å)                          | 9.9341(5)                                                                                                                                                                |
| <i>c</i> (Å)                          | 10.3685(5)                                                                                                                                                               |
| $\alpha$ (°)                          | 98.203(2)                                                                                                                                                                |
| $\beta$ (°)                           | 101.166(2)                                                                                                                                                               |
| $\gamma$ (°)                          | 103.107(2)                                                                                                                                                               |
| Volume (Å <sup>3</sup> )              | 834.05(8)                                                                                                                                                                |
| <i>Z</i>                              | 2                                                                                                                                                                        |
| Density (g/mL)                        | 1.498                                                                                                                                                                    |

|                                                                                     |                |
|-------------------------------------------------------------------------------------|----------------|
| $\mu$ (1/mm)                                                                        | 2.470          |
| $F$ (000)                                                                           | 380            |
| $\theta$ (min, max)                                                                 | 2.49 to 26.21  |
| No. of unique reflns                                                                | 12302          |
| No. of parameters                                                                   | 222            |
| $R_{\text{obs}}$ , $wR_{2_{\text{obs}}}$                                            | 0.0302, 0.0727 |
| $\Delta\rho_{\text{min}}$ , $\Delta\rho_{\text{max}}$ ( $\text{e}\text{\AA}^{-3}$ ) | 0.0390, 0.0769 |
| Goof                                                                                | 1.040          |

**b. Single crystal XRD data of 6i:**

| DATA                                  | 6i                                                                                  |
|---------------------------------------|-------------------------------------------------------------------------------------|
| Molecular Structure (ORTEP Structure) | 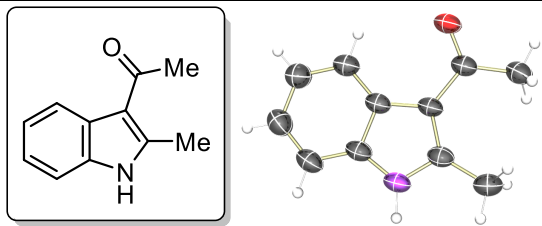 |
| Formula                               | $\text{C}_{11}\text{H}_{11}\text{NO}$                                               |
| Formula weight                        | 173.21                                                                              |
| Color                                 | Yellowish white                                                                     |
| Temperature/K                         | 296(2)                                                                              |
| Radiation                             | Mo $K\alpha$                                                                        |
| Wavelength/ $\text{\AA}$              | 1.54178                                                                             |
| Crystal system                        | monoclinic                                                                          |
| Space group                           | $C 2/c$                                                                             |
| $a$ ( $\text{\AA}$ )                  | 13.5293(7)                                                                          |
| $b$ ( $\text{\AA}$ )                  | 7.3263(3)                                                                           |
| $c$ ( $\text{\AA}$ )                  | 19.0986(9)                                                                          |
| $\alpha$ ( $^\circ$ )                 | 90                                                                                  |

|                                                               |                |
|---------------------------------------------------------------|----------------|
| $\beta$ (°)                                                   | 99.741(3)      |
| $\gamma$ (°)                                                  | 90             |
| Volume (Å <sup>3</sup> )                                      | 1865.75(15)    |
| Z                                                             | 8              |
| Density (g/mL)                                                | 1.233          |
| $\mu$ (1/mm)                                                  | 0.632          |
| F (000)                                                       | 736            |
| $\theta$ (min, max)                                           | 4.70 to 71.47  |
| No. of unique reflns                                          | 13865          |
| No. of parameters                                             | 124            |
| R <sub>obs</sub> , wR <sub>2_obs</sub>                        | 0.0568, 0.1576 |
| $\Delta\rho_{\min}$ , $\Delta\rho_{\max}$ (eÅ <sup>-3</sup> ) | 0.0693, 0.1763 |
| Goof                                                          | 1.065          |

**c. Single crystal XRD data of 6j:**

| DATA                                  | 6j                                                                                   |
|---------------------------------------|--------------------------------------------------------------------------------------|
| Molecular Structure (ORTEP Structure) | 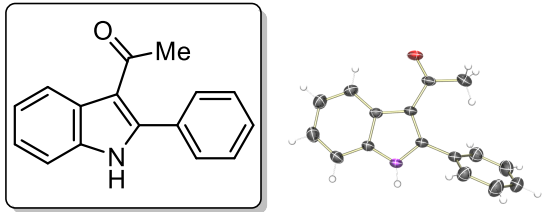 |
| Formula                               | C <sub>16</sub> H <sub>13</sub> NO                                                   |
| Formula weight                        | 235.27                                                                               |
| Color                                 | Yellowish white                                                                      |
| Temperature/K                         | 296(2)                                                                               |
| Radiation                             | Mo K $\alpha$                                                                        |
| Wavelength/Å                          | 0.71073                                                                              |
| Crystal system                        | triclinic                                                                            |

|                                                                        |                 |
|------------------------------------------------------------------------|-----------------|
| Space group                                                            | P -1            |
| $a$ (Å)                                                                | 7.4062(4)       |
| $b$ (Å)                                                                | 7.8098(5)       |
| $c$ (Å)                                                                | 10.9025(6)      |
| $\alpha$ (°)                                                           | 101.137(2)      |
| $\beta$ (°)                                                            | 93.235(2)       |
| $\gamma$ (°)                                                           | 96.394(2)       |
| Volume (Å <sup>3</sup> )                                               | 612.92(6)       |
| $Z$                                                                    | 2               |
| Density (g/mL)                                                         | 1.275           |
| $\mu$ (1/mm)                                                           | 0.080           |
| $F(000)$                                                               | 248             |
| $\theta$ (min, max)                                                    | 3.242 to 33.143 |
| No. of unique reflns                                                   | 39332           |
| No. of parameters                                                      | 166             |
| $R_{\text{obs}}, wR_2_{\text{obs}}$                                    | 0.0575, 0.1773  |
| $\Delta\rho_{\text{min}}, \Delta\rho_{\text{max}}$ (eÅ <sup>-3</sup> ) | 0.0832, 0.2091  |
| Goof                                                                   | 1.013           |
